# Supplementary material for: Gestational weight gain and adverse pregnancy outcomes: a prospective cohort study
Source: PubMed Central journal article supplement — BMJ Open. 2020 Sep 2;10(9):e038187. doi: 10.1136/bmjopen-2020-038187 (PMC7470642; doi:10.1136/bmjopen-2020-038187), 2020-09-02
Supplement: bmjopen-2020-038187.draft_revisions.pdf [file bmjopen-2020-038187.draft_revisions.pdf]

# BMJ Open

BMJ Open is committed to open peer review. As part of this commitment we make the peer review history of every article we publish publicly available.

When an article is published we post the peer reviewers' comments and the authors' responses online. We also post the versions of the paper that were used during peer review. These are the versions that the peer review comments apply to.

The versions of the paper that follow are the versions that were submitted during the peer review process. They are not the versions of record or the final published versions. They should not be cited or distributed as the published version of this manuscript.

BMJ Open is an open access journal and the full, final, typeset and author-corrected version of record of the manuscript is available on our site with no access controls, subscription charges or pay-per-view fees (<http://bmjopen.bmj.com>).

If you have any questions on BMJ Open's open peer review process please email [info.bmjopen@bmj.com](mailto:info.bmjopen@bmj.com)

# BMJ Open

## Gestational weight gain and adverse pregnancy outcomes: a prospective cohort study

|                               |                                                                                                                                                                                                                                                                                                                                                                                                                                                                                                                                                                                                                                                                                                                                                                                 |
|-------------------------------|---------------------------------------------------------------------------------------------------------------------------------------------------------------------------------------------------------------------------------------------------------------------------------------------------------------------------------------------------------------------------------------------------------------------------------------------------------------------------------------------------------------------------------------------------------------------------------------------------------------------------------------------------------------------------------------------------------------------------------------------------------------------------------|
| Journal:                      | <i>BMJ Open</i>                                                                                                                                                                                                                                                                                                                                                                                                                                                                                                                                                                                                                                                                                                                                                                 |
| Manuscript ID                 | bmjopen-2020-038187                                                                                                                                                                                                                                                                                                                                                                                                                                                                                                                                                                                                                                                                                                                                                             |
| Article Type:                 | Original research                                                                                                                                                                                                                                                                                                                                                                                                                                                                                                                                                                                                                                                                                                                                                               |
| Date Submitted by the Author: | 02-Mar-2020                                                                                                                                                                                                                                                                                                                                                                                                                                                                                                                                                                                                                                                                                                                                                                     |
| Complete List of Authors:     | Wu, Yuelin; Shanghai First Maternity and infant hospital, Department of Obstetrics<br>Wan, Sheng; Shanghai First Maternity and infant hospital, Department of Obstetrics<br>Gu, Shengyi; Xinhua Hospital, Shanghai Jiao Tong University School of Medicine, Department of Obstetrics and Gynecology<br>Mou, Zhengqian; Xinhua Hospital, Shanghai Jiao Tong University School of Medicine, Department of Obstetrics and Gynecology<br>Dong, Lingling; Shanghai First Maternity and infant hospital, Department of Obstetrics<br>Luo, Zhong-Cheng; Lunenfeld-Tanenbaum Research Institute, Obstetrics and Gynecology, Mount Sinai Hospital<br>Zhang, Jun ; Shanghai Jiao Tong University,<br>Hua, Xiaolin; Shanghai First Maternity and infant hospital, Department of Obstetrics |
| Keywords:                     | EPIDEMIOLOGY, Maternal medicine < OBSTETRICS, Fetal medicine < OBSTETRICS, OBSTETRICS                                                                                                                                                                                                                                                                                                                                                                                                                                                                                                                                                                                                                                                                                           |
|                               |                                                                                                                                                                                                                                                                                                                                                                                                                                                                                                                                                                                                                                                                                                                                                                                 |

SCHOLARONE™  
Manuscripts

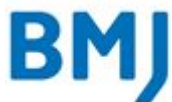

I, the Submitting Author has the right to grant and does grant on behalf of all authors of the Work (as defined in the below author licence), an exclusive licence and/or a non-exclusive licence for contributions from authors who are: i) UK Crown employees; ii) where BMJ has agreed a CC-BY licence shall apply, and/or iii) in accordance with the terms applicable for US Federal Government officers or employees acting as part of their official duties; on a worldwide, perpetual, irrevocable, royalty-free basis to BMJ Publishing Group Ltd ("BMJ") its licensees and where the relevant Journal is co-owned by BMJ to the co-owners of the Journal, to publish the Work in this journal and any other BMJ products and to exploit all rights, as set out in our [licence](#).

The Submitting Author accepts and understands that any supply made under these terms is made by BMJ to the Submitting Author unless you are acting as an employee on behalf of your employer or a postgraduate student of an affiliated institution which is paying any applicable article publishing charge ("APC") for Open Access articles. Where the Submitting Author wishes to make the Work available on an Open Access basis (and intends to pay the relevant APC), the terms of reuse of such Open Access shall be governed by a Creative Commons licence – details of these licences and which [Creative Commons](#) licence will apply to this Work are set out in our licence referred to above.

Other than as permitted in any relevant BMJ Author's Self Archiving Policies, I confirm this Work has not been accepted for publication elsewhere, is not being considered for publication elsewhere and does not duplicate material already published. I confirm all authors consent to publication of this Work and authorise the granting of this licence.

# Gestational weight gain and adverse pregnancy outcomes: a prospective cohort study

Yuelin Wu, MA<sup>1#</sup>, Sheng Wan, MD<sup>1#</sup>, Shengyi Gu, MA<sup>2</sup>, Zhengqian Mou, MA<sup>2</sup>, Lingling Dong,

MA<sup>1</sup>, Zhongcheng Lou, PhD<sup>3</sup>, Jun Zhang, PhD<sup>2\*</sup>, Xiaolin Hua, MD<sup>1\*</sup>

1. Department of Obstetrics, Shanghai First Maternity and infant hospital, Shanghai Tongji University School of Medicine, Shanghai, China
2. Department of Obstetrics and Gynecology, Xinhua Hospital, Shanghai Jiao Tong University School of Medicine, Shanghai, China
3. Lunenfeld-Tanenbaum Research Institute, Obstetrics and Gynecology, Mount Sinai Hospital, Department of Obstetrics and Gynecology, University of Toronto, Toronto, Canada

**#These authors contributed equally to this work.**

**\*Correspondence:**

**Xiaolin Hua, MD**

Department of Obstetrics, Shanghai First Maternity and infant hospital, Shanghai Tongji

University School of Medicine, Shanghai, China

2699 West Gaoke Road, Shanghai, China 201204

Tel: 021-20261000

1  
2  
3  
4 Fax: 021-20261000  
5

6  
7 Email: xiaolin\_hua@tongji.edu.cn  
8  
9

10  
11  
12 **Jun Zhang, PhD**  
13

14 Department of Obstetrics and Gynecology, Xinhua Hospital, Shanghai Jiao Tong University  
15

16  
17 School of Medicine  
18

19  
20 1665 Kongjiang Road, Shanghai, China 200092  
21

22  
23 Tel: 021-25078999  
24

25  
26 Fax: 021-25078293  
27

28  
29 Email: zhangjun@xinhumed.com.cn  
30  
31  
32  
33  
34  
35  
36  
37  
38  
39  
40  
41  
42  
43  
44  
45  
46  
47  
48  
49  
50  
51  
52  
53  
54  
55  
56  
57  
58  
59  
60

## Abstract

**Objective** To assess the associations of gestational weight gain (GWG) in early, late with subsequent risks of adverse pregnancy outcomes in Chinese women.

**Design** Prospective cohort study.

**Setting** Shanghai, China.

**Participants** We studied 2670 nulliparous singleton pregnant women with complete data on weight gain in early ( $\leq 17$  weeks of gestation) and late ( $> 17$  weeks) pregnancy in the Shanghai Birth Cohort.

**Methods** GWG was standardized into z-scores by gestational age and categorized as low (z score  $< -1$ ), normal ( $-1$  to  $1$ ), and high ( $> 1$ ). The adjusted relative risks (aRRs) and 95% confidence intervals (CIs) were estimated in log-binomial regression models. Interaction effects were tested, and stratified analyses were performed where appropriate.

**Outcome measures** Adverse maternal and neonatal outcomes.

**Results** Independent from GWG in late pregnancy, higher GWG in early pregnancy

1  
2  
3  
4 was associated with higher risks of gestational diabetes mellitus, caesarean section, and  
5  
6  
7  
8 prolonged hospitalization (all  $P < 0.05$ ). Higher GWG in late pregnancy was  
9  
10  
11 independently associated with higher risks of caesarean section, large for gestational  
12  
13  
14 age, and macrosomia (all  $P < 0.05$ ). In addition, the risk of gestational hypertension  
15  
16  
17 increased significantly with increased total GWG. The effects of GWG in late  
18  
19  
20 pregnancy on maternal and neonatal outcomes were significantly different between  
21  
22  
23 women bearing a female vs. male fetus.  
24  
25  
26  
27  
28

29 **Conclusion** The associations with pregnancy outcomes differ for GWG in early and  
30  
31  
32 late pregnancy. There might be sex dimorphism in the impacts of late GWG on perinatal  
33  
34  
35  
36  
37 outcomes.  
38  
39

40 **Keywords** gestational weight gain, pregnancy outcomes, z-scores, fetal sex  
41  
42  
43  
44  
45  
46  
47  
48  
49  
50  
51  
52  
53  
54  
55  
56  
57  
58  
59  
60

## Strengths and limitations of this study

- The SBC database contains detailed clinical data including pre-pregnancy weight, weight measurements during pregnancy and last pregnancy weight measurements. This made it possible to study GWG in both early and late pregnancy.
- Our use of GWG z-scores instead of original weight gain to account for the gestational-age-dependent nature of GWG allowed us to disentangle the effects of GWG from the effects of gestational duration (a shorter pregnancy duration should be correlated to less weight gain).
- We only investigated the short-term perinatal outcomes. Further studies on long-term outcomes would provide important evidence regarding the associations between chronic diseases and events during the intrauterine phase.



## Introduction

Gestational weight gain (GWG) has been associated with pregnancy outcomes.

Insufficient weight gain has been linked with increased risks of low birth weight, small

for gestational age (SGA) and preterm birth, while excessive weight gain has been

associated with large for gestational age (LGA), gestational diabetes mellitus (GDM),

preeclampsia, preterm birth, caesarean section, infant mortality and childhood obesity<sup>[1-</sup>

<sup>2]</sup>. However, although women are routinely weighed in clinical settings and receive

gestational weight gain advice<sup>[3-4]</sup>, a high proportion of pregnant women who gained

above or below GWG weight ranges recommended by the guidelines<sup>[5]</sup>. Based on data

from 23 studies involving more than 1.3 million women, GWG was below or above

Institute of Medicine (IOM) guidelines<sup>[5]</sup> in 23% and 47% of pregnancies,

respectively<sup>[1]</sup>, and the prevalence of excess gestational weight gain appears to be on

the rise <sup>[6]</sup>.

It is well established that total GWG affects pregnancy outcomes<sup>[7]</sup>. Some studies

suggest that GWG during early pregnancy may be more important than late GWG for

certain pregnancy outcomes such as GDM and adverse cardio-metabolic profile in the

1  
2  
3  
4 offspring<sup>[8-11]</sup>. Overall, studies examining associations of early GWG with perinatal  
5  
6  
7  
8 outcomes have been relatively few in numbers, and these studies have often not  
9  
10  
11 accounted for the effects of weight gain in other periods of pregnancy<sup>[12]</sup>.  
12

13  
14  
15 In a prospective pregnancy cohort, we sought to explore in a homogenous Chinese  
16  
17  
18 population the associations of GWG during early and late pregnancy with maternal and  
19  
20  
21 neonatal outcomes  
22

## 23 24 25 26 **Materials and Methods**

### 27 28 29 30 *Study design and data source*

31  
32  
33  
34 This prospective cohort study is based on the recently developed Shanghai Birth Cohort  
35  
36  
37 (SBC) which has been described in detail elsewhere<sup>[13]</sup>. Briefly, the SBC cohort  
38  
39  
40 recruited 4127 women in pre-conception care (701) or early antenatal care (3426) in  
41  
42  
43 Shanghai upon signing an informed consent form commencing on September 1st, 2013,  
44  
45  
46  
47 resulting in 3699 live births. The collected data included maternal demographical  
48  
49  
50 characteristics, health behaviors, reproductive history, as well as clinical information  
51  
52  
53 related to pregnancy, birth and pregnancy outcomes. This study was approved by  
54  
55  
56  
57  
58  
59 Xinhua Hospital Research Ethics Committee, Shanghai Jiao Tong University School of  
60

1  
2  
3  
4 Medicine (reference number: XHEC-F-NSFC-2018-122).  
5  
6  
7

8 ***Study population***  
9

10  
11  
12 The present study included all singleton pregnancies in women with age  $\geq 20$  years who  
13  
14  
15  
16 started antenatal care before 17 weeks' gestation and delivered at  $\geq 28$  weeks of  
17  
18  
19 gestation with data available on weight gains in early and late gestation in the SBC  
20  
21  
22 cohort.  
23  
24

25  
26 Gestational age was estimated based on the date of last menstruation period and  
27  
28 confirmed by first trimester ultrasound dating. Eligible women must have data available  
29  
30 on self-reported pre-pregnancy weight (kg), measured weight and height (cm) in early  
31  
32 pregnancy (17 weeks of gestation or less), and measured weight in the last week before  
33  
34 delivery. Subjects with implausible weights at early pregnancy ( $< 30$  kg or  $> 350$  kg) or  
35  
36 implausible gestational weight-gain measurements (z-score  $< -4.0$  or  $> 4.0$ ) were  
37  
38 excluded, similar to the method of Johansson et al<sup>[14]</sup>. Women with major pre-  
39  
40 pregnancy illnesses such as pre-gestational diabetes, hypo- or hyper-thyroidism  
41  
42 (affecting GWG)<sup>[15]</sup> and heart/liver/kidney diseases were also excluded. A total of 2670  
43  
44  
45  
46  
47  
48  
49  
50  
51  
52  
53  
54  
55  
56  
57  
58 pregnancies constituted the final study sample. Figure 1 illustrates the flowchart in the  
59  
60

1  
2  
3  
4 selection of study subjects.  
5  
6  
7

### 8 ***Weight measurements*** 9

10  
11  
12 Pre-pregnancy weight (kg) was based on self-reports, while weight at early pregnancy  
13  
14 and at delivery was measured to the nearest 0.1 kg using the routinely available  
15  
16 electronic weighing device in the prenatal care clinics. Height (cm) at the first prenatal  
17  
18 visit was measured to the nearest 0.1 cm using the routinely available electronic  
19  
20 stadiometer in the hospital. Pre-pregnancy body mass index (BMI; kg/m<sup>2</sup>) was  
21  
22 calculated as pre-pregnancy weight (kg) divided by height (m)<sup>2</sup> and categorized as  
23  
24 underweight (<18.5 kg/m<sup>2</sup>), normal weight (18.5-24.9 kg/m<sup>2</sup>), overweight (25.0-29.9  
25  
26 kg/m<sup>2</sup>), and obese (≥ 30.0 kg/m<sup>2</sup>)<sup>[16]</sup>.  
27  
28  
29  
30  
31  
32  
33  
34  
35  
36  
37  
38  
39

40  
41 Early pregnancy in this study was defined as gestational age ≤17 weeks so as to include  
42  
43 virtually all women who started the first antenatal care in the hospital <sup>[17]</sup>. The 2009  
44  
45 Institute of Medicine (IOM) recommendations suggested that women should gain 0.5-  
46  
47 2 kg in early pregnancy<sup>[5]</sup> and the 50<sup>th</sup> centile GWG for women at gestational age ≤17  
48  
49 weeks was below 2 kg according to the INTERGROWTH-21<sup>st</sup> Project<sup>[2]</sup>. We examined  
50  
51 gestational weight gain (GWG) in early pregnancy (weight ≤17 weeks minus pre-  
52  
53  
54  
55  
56  
57  
58  
59  
60

1  
2  
3  
4 pregnancy weight) and late pregnancy (last measured weight before delivery minus  
5  
6  
7  
8 measured weight at  $\leq 17$  weeks). Total GWG was calculated as last measured weight  
9  
10  
11 before delivery minus pre-pregnancy weight. All GWG values were standardized into  
12  
13  
14 z-scores, using BMI category-specific values from the study cohort. The means and  
15  
16  
17 standard deviations (SD) of GWGs in early pregnancy and late pregnancy were used to  
18  
19  
20 convert the GWG values into z-scores. All GWG z-scores were first examined as  
21  
22  
23 continuous variables, and then categorized as  $< -1.0$  (low),  $-1.0$  to  $+1.0$  (normal) and  $>$   
24  
25  
26  $+1.0$  (high) in data analyses. The analyses for GWG in early pregnancy were restricted  
27  
28  
29 to women whose GWGs in late pregnancy were normal ( $-1.0$  to  $+1.0$ ). Similarly, the  
30  
31  
32 analyses for late pregnancy weight gain were restricted to women with weight gain  
33  
34  
35 value in early pregnancy within  $-1.0$  to  $+1.0$ .  
36  
37  
38  
39  
40  
41  
42  
43

### 44 ***Covariates***

45  
46  
47 Co-variables included fetal sex, maternal age (20 to 34,  $\geq 35$  years), parity (0,  $\geq 1$ ), pre-  
48  
49  
50 pregnancy body mass index (BMI) categories (underweight, normal, overweight/obese),  
51  
52  
53 alcohol/tobacco use (yes or no), GDM (yes or no), gestational hypertension (yes or no)  
54  
55  
56 and length of gestation (28 to 36,  $\geq 37$  weeks)  
57  
58  
59  
60

## ***Outcomes***

The outcomes included gestational diabetes mellitus (GDM), gestational hypertension, caesarean section, preterm birth, neonatal intensive care unit (NICU) admission, neonatal prolonged hospitalization ( $\geq 5$  days), severe neonatal outcomes, neonatal hyperbilirubinemia (12 mg/dL), LGA, SGA, macrosomia ( $>4000$  g) and low birthweight ( $<2500$  g).

All women received a 75 g oral glucose tolerance test (OGTT) during 24-28 weeks of gestation. GDM was diagnosed according to the IADPSG criteria: if anyone of the glucose values fell at or above the following thresholds: fasting 5.1 mmol/L, 1 hour 10.0 mmol/L, 2 hour 8.5 mmol/L. Gestational hypertension was defined as de novo hypertension (systolic blood pressure  $\geq 140$  mmHg or diastolic blood pressure  $\geq 90$  mmHg) after 20 weeks' gestation. Preterm birth was defined as gestational age at delivery  $<37$  weeks. SGA was defined as birth weight  $\leq 10^{\text{th}}$  percentile, and LGA as birth weight  $\geq 90^{\text{th}}$  percentile according to Chinese sex- and gestational age-specific birth weight standards<sup>[18]</sup>. Severe neonatal outcomes included death, 5 minute APGAR score  $<7$ , hypoglycemia ( $<40$  mg/dL), sepsis, cardiopulmonary resuscitation or

1  
2  
3  
4 ventilator support within 24 hours after birth, severe respiratory disorders (respiratory  
5  
6  
7  
8 distress syndrome or transient tachypnea of the newborn), serious birth defects, seizures,  
9  
10  
11 necrotizing enterocolitis, and hypoxic-ischemic encephalopathy.  
12  
13  
14

### 15 *Statistical analyses*

16  
17  
18  
19 Maternal demographic characteristics and clinical factors were compared among  
20  
21  
22 gestational weight gain below. Continuous variables were described by mean  $\pm$   
23  
24  
25 standard deviation (SD) or median (interquartile range, IQR). Categorical variables  
26  
27  
28 were described by counts and percentages (%). Analysis of variance or Kruskal-Wallis  
29  
30  
31  
32  
33  
34  
35  
36  
37  
38  
39  
40  
41  
42  
43  
44  
45  
46  
47  
48  
49  
50  
51  
52  
53  
54  
55  
56  
57  
58  
59  
60  
H tests were performed for continuous data, and chi-square tests or Fisher's exact tests  
were performed for categorical data.

The incidences of adverse pregnancy outcomes were examined among three GWG  
groups. Multivariate log-binomial regression models were used to estimate the  
unadjusted relative risks (RRs), adjusted relative risks (ARRs) and 95% confidence  
intervals (CIs) of adverse pregnancy outcomes across GWG groups. Regression model  
for maternal outcomes were adjusted for only co-variables with  $p < 0.2$  (maternal age,  
parity, pre-pregnancy BMI, alcohol/tobacco use, fetal sex and length of gestation).

1  
2  
3  
4 Neonatal outcomes models were further adjusted for GDM and PIH in addition to the  
5  
6  
7  
8 aforementioned factors. Effects between weight gain and fetal sex and other covariates  
9  
10  
11 on adverse neonatal outcomes were also tested. Interaction effects between GWG and  
12  
13  
14 fetal sex and other covariates (parity, maternal pre-pregnancy BMI, maternal age) on  
15  
16  
17 adverse maternal and neonatal outcomes were also tested.  
18  
19

20  
21  
22 All analyses were performed using the Statistical Analysis System (SAS) for Windows,  
23  
24  
25 version 9.4 (SAS Institute, Cary, NC).  $P < 0.05$  was considered statistically significant.  
26  
27  
28

### 29 *Patient and public involvement*

30  
31  
32  
33 No patients were involved in the design, or conduct, or reporting, or dissemination plans  
34  
35  
36  
37 of our research.  
38  
39

## 40 **Results**

### 41 *Study population and characteristics*

42  
43  
44  
45 A total of 2670 pregnant women met the study inclusion criteria. Of these, 1605 women  
46  
47  
48  
49 gained average weight in late pregnancy (z-score -1 to +1), weight gain above ( $< -1.0$ )  
50  
51  
52  
53 or below ( $> +1.0$ ) average in early pregnancy accounted for 11.6% respectively; 1717  
54  
55  
56  
57 women with average weight gain in early pregnancy, 14.4% and 13.7% gained above  
58  
59  
60



1  
2  
3  
4 and below average in late, respectively (Figure 1).  
5  
6  
7

8 Table 1 shows the characteristics of all pregnant women in the study. The  
9  
10  
11 characteristics of the study population stratified by maternal weight gain in early as  
12  
13  
14 well as late pregnancy are presented in Table S1-2.  
15  
16  
17

### 18 ***Weight gain during early pregnancy***

19  
20  
21  
22  
23 The risks of maternal and neonatal outcomes for GWG in early pregnancy are presented  
24  
25  
26 in Figure 2A and Table S3. Lower GWG was not significantly associated with  
27  
28  
29 pregnancy outcomes, compared with the average GWG. In contrast, the risks of GDM  
30  
31  
32 (aRR=1.66; 95% CI: 1.11-2.48), caesarean section (aRR=1.21; 95% CI: 1.05-1.39) and  
33  
34  
35 prolonged hospitalization (aRR=1.56; 95% CI: 1.03-2.38) were higher in the group  
36  
37  
38 with GWG above average in early pregnancy. No significant interactions between  
39  
40  
41  
42  
43  
44  
45  
46  
47  
48  
49  
50  
51  
52  
53  
54  
55  
56  
57  
58  
59  
60  
61  
62  
63  
64  
65  
66  
67  
68  
69  
70  
71  
72  
73  
74  
75  
76  
77  
78  
79  
80  
81  
82  
83  
84  
85  
86  
87  
88  
89  
90  
91  
92  
93  
94  
95  
96  
97  
98  
99  
100  
101  
102  
103  
104  
105  
106  
107  
108  
109  
110  
111  
112  
113  
114  
115  
116  
117  
118  
119  
120  
121  
122  
123  
124  
125  
126  
127  
128  
129  
130  
131  
132  
133  
134  
135  
136  
137  
138  
139  
140  
141  
142  
143  
144  
145  
146  
147  
148  
149  
150  
151  
152  
153  
154  
155  
156  
157  
158  
159  
160  
161  
162  
163  
164  
165  
166  
167  
168  
169  
170  
171  
172  
173  
174  
175  
176  
177  
178  
179  
180  
181  
182  
183  
184  
185  
186  
187  
188  
189  
190  
191  
192  
193  
194  
195  
196  
197  
198  
199  
200  
201  
202  
203  
204  
205  
206  
207  
208  
209  
210  
211  
212  
213  
214  
215  
216  
217  
218  
219  
220  
221  
222  
223  
224  
225  
226  
227  
228  
229  
230  
231  
232  
233  
234  
235  
236  
237  
238  
239  
240  
241  
242  
243  
244  
245  
246  
247  
248  
249  
250  
251  
252  
253  
254  
255  
256  
257  
258  
259  
260  
261  
262  
263  
264  
265  
266  
267  
268  
269  
270  
271  
272  
273  
274  
275  
276  
277  
278  
279  
280  
281  
282  
283  
284  
285  
286  
287  
288  
289  
290  
291  
292  
293  
294  
295  
296  
297  
298  
299  
300  
301  
302  
303  
304  
305  
306  
307  
308  
309  
310  
311  
312  
313  
314  
315  
316  
317  
318  
319  
320  
321  
322  
323  
324  
325  
326  
327  
328  
329  
330  
331  
332  
333  
334  
335  
336  
337  
338  
339  
340  
341  
342  
343  
344  
345  
346  
347  
348  
349  
350  
351  
352  
353  
354  
355  
356  
357  
358  
359  
360  
361  
362  
363  
364  
365  
366  
367  
368  
369  
370  
371  
372  
373  
374  
375  
376  
377  
378  
379  
380  
381  
382  
383  
384  
385  
386  
387  
388  
389  
390  
391  
392  
393  
394  
395  
396  
397  
398  
399  
400  
401  
402  
403  
404  
405  
406  
407  
408  
409  
410  
411  
412  
413  
414  
415  
416  
417  
418  
419  
420  
421  
422  
423  
424  
425  
426  
427  
428  
429  
430  
431  
432  
433  
434  
435  
436  
437  
438  
439  
440  
441  
442  
443  
444  
445  
446  
447  
448  
449  
450  
451  
452  
453  
454  
455  
456  
457  
458  
459  
460  
461  
462  
463  
464  
465  
466  
467  
468  
469  
470  
471  
472  
473  
474  
475  
476  
477  
478  
479  
480  
481  
482  
483  
484  
485  
486  
487  
488  
489  
490  
491  
492  
493  
494  
495  
496  
497  
498  
499  
500  
501  
502  
503  
504  
505  
506  
507  
508  
509  
510  
511  
512  
513  
514  
515  
516  
517  
518  
519  
520  
521  
522  
523  
524  
525  
526  
527  
528  
529  
530  
531  
532  
533  
534  
535  
536  
537  
538  
539  
540  
541  
542  
543  
544  
545  
546  
547  
548  
549  
550  
551  
552  
553  
554  
555  
556  
557  
558  
559  
560  
561  
562  
563  
564  
565  
566  
567  
568  
569  
570  
571  
572  
573  
574  
575  
576  
577  
578  
579  
580  
581  
582  
583  
584  
585  
586  
587  
588  
589  
590  
591  
592  
593  
594  
595  
596  
597  
598  
599  
600  
601  
602  
603  
604  
605  
606  
607  
608  
609  
610  
611  
612  
613  
614  
615  
616  
617  
618  
619  
620  
621  
622  
623  
624  
625  
626  
627  
628  
629  
630  
631  
632  
633  
634  
635  
636  
637  
638  
639  
640  
641  
642  
643  
644  
645  
646  
647  
648  
649  
650  
651  
652  
653  
654  
655  
656  
657  
658  
659  
660  
661  
662  
663  
664  
665  
666  
667  
668  
669  
670  
671  
672  
673  
674  
675  
676  
677  
678  
679  
680  
681  
682  
683  
684  
685  
686  
687  
688  
689  
690  
691  
692  
693  
694  
695  
696  
697  
698  
699  
700  
701  
702  
703  
704  
705  
706  
707  
708  
709  
710  
711  
712  
713  
714  
715  
716  
717  
718  
719  
720  
721  
722  
723  
724  
725  
726  
727  
728  
729  
730  
731  
732  
733  
734  
735  
736  
737  
738  
739  
740  
741  
742  
743  
744  
745  
746  
747  
748  
749  
750  
751  
752  
753  
754  
755  
756  
757  
758  
759  
760  
761  
762  
763  
764  
765  
766  
767  
768  
769  
770  
771  
772  
773  
774  
775  
776  
777  
778  
779  
780  
781  
782  
783  
784  
785  
786  
787  
788  
789  
790  
791  
792  
793  
794  
795  
796  
797  
798  
799  
800  
801  
802  
803  
804  
805  
806  
807  
808  
809  
810  
811  
812  
813  
814  
815  
816  
817  
818  
819  
820  
821  
822  
823  
824  
825  
826  
827  
828  
829  
830  
831  
832  
833  
834  
835  
836  
837  
838  
839  
840  
841  
842  
843  
844  
845  
846  
847  
848  
849  
850  
851  
852  
853  
854  
855  
856  
857  
858  
859  
860  
861  
862  
863  
864  
865  
866  
867  
868  
869  
870  
871  
872  
873  
874  
875  
876  
877  
878  
879  
880  
881  
882  
883  
884  
885  
886  
887  
888  
889  
890  
891  
892  
893  
894  
895  
896  
897  
898  
899  
900  
901  
902  
903  
904  
905  
906  
907  
908  
909  
910  
911  
912  
913  
914  
915  
916  
917  
918  
919  
920  
921  
922  
923  
924  
925  
926  
927  
928  
929  
930  
931  
932  
933  
934  
935  
936  
937  
938  
939  
940  
941  
942  
943  
944  
945  
946  
947  
948  
949  
950  
951  
952  
953  
954  
955  
956  
957  
958  
959  
960  
961  
962  
963  
964  
965  
966  
967  
968  
969  
970  
971  
972  
973  
974  
975  
976  
977  
978  
979  
980  
981  
982  
983  
984  
985  
986  
987  
988  
989  
990  
991  
992  
993  
994  
995  
996  
997  
998  
999  
1000

### 48 ***Weight gain during late pregnancy***

51  
52 Associations of GWG in late pregnancy with perinatal outcomes are presented in Figure  
53  
54  
55  
56 2B and Table S4. In contrast to early pregnancy, the odds for GDM and SGA decreased  
57  
58  
59 significantly with increased GWG in late pregnancy, whereas the risks for LGA and  
60

1  
2  
3  
4 macrosomia increased. Weight gain above average was correlated with a higher risk for  
5  
6  
7  
8 caesarean section (aRR=1.24; 95% CI: 1.09-1.41) in late pregnancy. In addition, higher  
9  
10  
11 GWG showed a protective effect against neonatal hyperbilirubinemia (aRR=0.64; 95%  
12  
13  
14  
15 CI: 0.43-0.94).

16  
17  
18 Significant interactions were identified between GWG in late pregnancy and fetal sex.  
19  
20  
21  
22 Figure 3 and Table S5 shows the associations of late pregnancy weight gain with  
23  
24  
25 pregnancy outcomes stratified by fetal sex. The risks for LGA and caesarean section  
26  
27  
28 significantly increased in women with higher GWG in late pregnancy, but the odds of  
29  
30  
31  
32  
33 GDM increased with less GWG, regardless of fetal sex. However, higher risks of  
34  
35  
36 gestational hypertension (aRR=2.31; 95% CI: 1.08-4.95) was only observed in women  
37  
38  
39 bearing a female fetus with higher GWG. Conversely, higher GWG in late pregnancy  
40  
41  
42 was associated with GDM (aRR=0.30; 95% CI: 0.10-0.96), neonatal  
43  
44  
45 hyperbilirubinemia (aRR=0.46; 95% CI: 0.24-0.89) and macrosomia (aRR=2.05; 95%  
46  
47  
48 CI: 1.27-3.31) for women having a boy, but not for women having a girl, indicating  
49  
50  
51  
52  
53 effect modifications by fetal sex. But when stratified by fetal sex, the lower risk of SGA  
54  
55  
56  
57 with higher GWG was no longer observed.  
58  
59  
60

### ***Total weight gain during pregnancy***

Figure 2C and Table S6 show results for pregnancy outcomes by total GWG. The effect sizes of GWG in late pregnancy on pregnancy outcomes were almost identical with the effect sizes of total GWG. Similar to late pregnancy, the risks for LGA, macrosomia and gestational hypertension increased significantly with increased total GWG. Higher GWG was also linked with a higher risk for caesarean section (aRR=1.78; 95% CI: 1.14-2.76). Moreover, total GWG below the average was associated with higher risks of GDM (aRR=1.51; 95% CI: 1.15-1.98) and SGA (aRR=1.53; 95% CI: 1.01-2.32). No significant interactions between total GWG and other covariates were observed.

## **Discussion**

### **Main Findings**

In this study, we found that the associations of gestational stage-specific weight gain with maternal and neonatal outcomes were different. Of those, independent of GWG in late pregnancy, higher GWG in early was associated with higher risks of GDM, caesarean section, and neonatal prolonged hospitalization ( $P < 0.05$ ).

### **Strengths and limitations**

1  
2  
3  
4 There are strengths in our study compared with other studies in the literature. First, the  
5  
6  
7  
8 SBC database contains detailed clinical data including pre-pregnancy weight, weight  
9  
10  
11 measurements during pregnancy and last pregnancy weight measurements. This made  
12  
13  
14 it possible to study GWG in both early and late pregnancy. In addition, our use of GWG  
15  
16  
17 z-scores instead of original weight gain to account for the gestational-age-dependent  
18  
19  
20 nature of GWG allowed us to disentangle the effects of GWG from the effects of  
21  
22  
23 gestational duration (a shorter pregnancy duration should be correlated to less weight  
24  
25  
26 gain)<sup>[14, 36]</sup>.  
27  
28  
29  
30  
31  
32

33 There are limitations in this study. We only investigated the short-term perinatal  
34  
35  
36 outcomes. Recently, researchers have linked an individual's susceptibility to chronic  
37  
38  
39 disease such as cardio-metabolic disease and obesity in later life to events during the  
40  
41  
42 intrauterine phase of development<sup>[8, 20, 37]</sup>. Further studies on long-term outcomes would  
43  
44  
45  
46  
47 provide important evidence regarding the associations between chronic diseases and  
48  
49  
50  
51 events during the intrauterine phase.  
52  
53

### 54 **Interpretation**

55  
56  
57 Associations between insufficient or excessive weight gain during the whole pregnancy  
58  
59  
60

1  
2  
3  
4 and maternal and child health outcomes have been well described<sup>[1-2, 7]</sup>. A meta-analysis  
5  
6  
7  
8 of pooled 1309136 participant data from 23 cohort studies showed that women who  
9  
10  
11 gained high weight were more likely to have LAG, caesarean section and macrosomia,  
12  
13  
14 while women who gained less were at an increased risk of SGA<sup>[1]</sup>. These findings are  
15  
16  
17  
18 in line with the association of maternal weight gain with adverse pregnancy outcomes  
19  
20  
21  
22 in our study.  
23  
24

25 There is growing recognition that the impacts of gestational stage-specific weight gain  
26  
27  
28 on pregnancy outcomes may vary<sup>[8-9, 19-21]</sup>. GWG in early pregnancy largely reflects  
29  
30  
31  
32 maternal fat deposition, whereas GWG thereafter is mainly attributed to maternal and  
33  
34  
35  
36 amniotic fluid expansion, and growth of the fetus, placenta and uterus<sup>[5]</sup>. In this context,  
37  
38  
39  
40 mothers with increased fat deposition during pregnancy may affect the adiposity of the  
41  
42  
43  
44 offspring by higher placental transfer of nutrients, such as glucose and free fatty acids,  
45  
46  
47  
48 which may lead to maternal pregnancy complications, such as GDM, and permanent  
49  
50  
51  
52 fetal and childhood adaptations in appetite, energy metabolism and neuro-endocrine  
53  
54  
55  
56 function <sup>[21-22]</sup>. Therefore, GWG in early pregnancy, prior to the development of  
57  
58  
59  
60 pregnancy outcomes, might be as or more important than GWG in late pregnancy with

1  
2  
3  
4 respect to pregnancy outcomes<sup>[9, 14]</sup>. A study of 5908 Netherlands mother-offspring  
5  
6  
7  
8 pairs reported that higher weight gain in early pregnancy was associated with an  
9  
10  
11 adverse cardio-metabolic profile in the offspring [odds ratio (OR)=1.19; 95% CI: 1.10-  
12  
13  
14 1.29]<sup>[8]</sup>. Similarly, a study of 5154 UK mother-offspring pairs showed that GWG in the  
15  
16  
17 first 14 weeks tended to be incrementally associated with offspring BMI, waist  
18  
19 circumference and fat mass in children at age 9 years, but after 14 weeks of gestation,  
20  
21  
22 only high levels of GWG were associated with offspring's adiposity measures,  
23  
24  
25  
26 highlighting the importance of the timing of weight gain in pregnancy<sup>[19]</sup>.  
27  
28  
29  
30  
31

32  
33 Studies to clarify the relationship between gestational stage-specific weight gain and  
34  
35  
36 adverse pregnancy outcomes have been sporadic. A study of Korean pregnant women  
37  
38  
39 found that GWG velocity at early pregnancy was significantly associated with GDM  
40  
41  
42 (OR=1.77), gestational hypertension (OR=2.80), cesarean section (OR = 1.65), LGA  
43  
44  
45 (OR = 1.77) and macrosomia (OR = 1.93)<sup>[12]</sup>. However, the analyses have not  
46  
47  
48  
49 accounted for the effects of weight gain in other periods of pregnancy. In contrast, our  
50  
51  
52  
53 analyses for early/late pregnancy GWG were restricted to women whose GWG z-scores  
54  
55  
56  
57 in other pregnancy stage were normal (-1.0 to +1.0), and thus the observed associations  
58  
59  
60

1  
2  
3  
4 are independent of GWG in different periods. Our data from a large population-based  
5  
6  
7  
8 Chinese cohort in Shanghai showed that higher, but not lower, maternal GWG in early  
9  
10  
11 pregnancy was associated with increased risks of adverse pregnancy outcomes,  
12  
13  
14 including GDM, caesarean section and prolonged hospitalization. In late pregnancy,  
15  
16  
17 low weight gain was associated with GDM as well as SGA, and high weight gain was  
18  
19  
20  
21  
22 associated with caesarean section, LGA and macrosomia

23  
24  
25 High GWG in early pregnancy has been associated with an increased risk of GDM,  
26  
27  
28 while there are some inconsistent data concerning the associations of GWG in second  
29  
30  
31 and third trimester or the whole pregnancy with GDM<sup>[11, 23-25]</sup>. Our study presented  
32  
33  
34 some consistent results with other studies<sup>[12, 23, 26]</sup> indicating that higher GWG in early  
35  
36  
37 pregnancy may increase the risk of developing GDM (aRR=1.66), but higher GWG in  
38  
39  
40 late pregnancy showed a reversed association. The discrepancy might be due to that  
41  
42  
43 women diagnosed with GDM might have undergone weight control interventions such  
44  
45  
46 as prescribed diet and physical exercise after the GDM diagnosis. Avoiding high  
47  
48  
49 weight gain in early pregnancy may prevent GDM, and doctors might consider  
50  
51  
52  
53  
54 preemptive actions in high-risk pregnant women.  
55  
56  
57  
58  
59  
60

1  
2  
3  
4 The risk of gestational hypertension increased significantly with higher maternal total  
5  
6  
7  
8 GWG. A study of 29861 women from 25 hospitals in America showed that early weight  
9  
10  
11 gain over the 2009 IOM recommendation were shown to be associated with the  
12  
13  
14 development of gestational hypertension (adjusted OR=1.84; 95% CI: 1.66–2.04)<sup>[27]</sup>.  
15  
16

17  
18 In a study of 101259 women with chronic hypertension, women who gained weight  
19  
20  
21 above IOM guidelines were at increased odds of eclampsia <sup>[28]</sup>. Given the known  
22  
23  
24 vascular permeability and decreased plasma oncotic pressure that accompanies  
25  
26  
27 preeclampsia and its association with rapid weight gain<sup>[29]</sup>, excessive GWG may be a  
28  
29  
30 cause of hypertensive disease of pregnancy.  
31  
32  
33

34  
35  
36 Our data suggest effect modification by fetal sex in the association of GWG in late  
37  
38  
39 pregnancy with birth outcomes. Recent studies suggest that fetus sex may affect  
40  
41  
42 pregnancy outcomes<sup>[30-31]</sup>. Although not very clear, how fetal sex may influence these  
43  
44  
45 outcomes may be explained by several factors. The placenta is an active endocrine  
46  
47  
48 organ, a sex-specific maternal-placental-fetal interaction may be involved <sup>[19]</sup>. Animal  
49  
50  
51 studies suggest that maternal baseline BMI and GWG are associated with the hormonal  
52  
53  
54 milieu, including insulin resistance<sup>[32]</sup>. In agreement with this concept, a growing body  
55  
56  
57  
58  
59  
60



1  
2  
3  
4 of evidence linking early pregnancy GWG with cord blood hormones that may affect  
5  
6  
7  
8 fetal growth and development<sup>[33]</sup>. Previous studies reported fetal sex differences in  
9  
10  
11 maternal first trimester hormones concentrations <sup>[15, 30, 34]</sup>. The resultant intrauterine  
12  
13  
14  
15 environment may affect fetal development.  
16

17  
18 Our findings may have clinical implications. First, from early pregnancy onwards,  
19  
20  
21  
22 GWG may affect subsequent maternal and neonatal outcomes. Second, although  
23  
24  
25 interventions to limit GWG in late pregnancy are effective, the benefits might be  
26  
27  
28 modest at best. To mitigate the harms of excessive weight gain, attention to appropriate  
29  
30  
31 weight gain in both early and late pregnancy should be integrated into routine prenatal  
32  
33  
34  
35  
36 care<sup>[1, 7, 35]</sup>.  
37  
38  
39

## 40 **Conclusion**

41  
42  
43  
44 The associations with adverse pregnancy outcomes differ for GWG in early and late  
45  
46  
47 pregnancy, and there may be effect modification by fetal sex in the association of GWG  
48  
49  
50  
51 in late pregnancy with some pregnancy outcomes. Weight gain management should be  
52  
53  
54 integrated into the routine prenatal care to decrease the risks of adverse pregnancy  
55  
56  
57  
58 outcomes.  
59  
60

1  
2  
3  
4  
5  
6  
7  
8 **Acknowledgement** We thank the study participants for permitting us to use their  
9  
10 personal data.  
11  
12

13  
14 **Contributors** YW and SW participated in interpretation of data and involved in  
15  
16  
17 drafting the manuscript. SG, ZM and LD analyzed the data and critically revised the  
18  
19 manuscript. ZL, JZ and XH made substantial contributions to conception and design,  
20  
21 interpreted the data, and critically revised the manuscript. All authors read and  
22  
23 approved the final manuscript. All authors read and  
24  
25 approved the final manuscript. All authors read and  
26  
27 approved the final manuscript. All authors read and  
28  
29 approved the final manuscript.

30  
31  
32 **Funding** This research was supported by a research grant (81873816) from the  
33  
34  
35 National Natural Science Foundation of China.  
36  
37

38  
39 **Competing interests** None declared. Completed disclosure of interests form  
40  
41  
42 available to view online as supporting information.  
43  
44

45  
46 **Patient consent for publication** Not required.  
47  
48

49  
50 **Ethics approval** This study was approved by Xinhua Hospital Research Ethics  
51  
52  
53 Committee, Shanghai Jiao Tong University School of Medicine (reference number:  
54  
55  
56 XHEC-F-NSFC-2018-122).  
57  
58  
59  
60

1  
2  
3  
4 **Provenance and peer review** Not commissioned; externally peer reviewed.  
5  
6  
7

8 **Open access** This is an open access article distributed in accordance with the  
9  
10  
11 Creative Commons Attribution Non Commercial (CC BY-NC 4.0) license, which  
12  
13  
14 permits others to distribute, remix, adapt, build upon this work non-commercially, and  
15  
16  
17 license their derivative works on different terms, provided the original work is properly  
18  
19  
20 cited, appropriate credit is given, any changes made indicated, and the use is non-  
21  
22  
23 commercial. See: <http://creativecommons.org/licenses/by-nc/4.0/>.  
24  
25  
26  
27  
28

## 29 **ORCID iD**

30  
31  
32 X Hua <https://orcid.org/0000-0003-1098-5010>  
33  
34  
35  
36  
37  
38

## 39 **References**

- 40  
41 1. Goldstein R.F., Abell S.K., Ranasinha S., Misso M., Boyle J.A., Black M.H., et al.  
42 Association of Gestational Weight Gain With Maternal and Infant Outcomes: A Systematic  
43 Review and Meta-analysis. *Jama* 2017; 317: 2207.  
44  
45 2. Ismail L.C., Bishop D.C., Pang R., Ohuma E.O., Kac G., Abrams B., et al. Gestational  
46 weight gain standards based on women enrolled in the Fetal Growth Longitudinal Study of the  
47 INTERGROWTH-21st Project: a prospective longitudinal cohort study. *Bmj British Medical*  
48 *Journal* 2016; 352: i555.  
49  
50 3. Shulman R., Kottke M. Impact of maternal knowledge of recommended weight gain in  
51 pregnancy on gestational weight gain. *American Journal of Obstetrics & Gynecology* 2016;  
52 214: 754.e751-754.e757.  
53  
54 4. Krukowski R.A., West D.S., Dicarlo M., Cleves M.A., Saylor M.E., Andres A.  
55  
56  
57  
58  
59  
60

1  
2  
3 Association of Gestational Weight Gain Expectations and Advice on Actual Weight Gain.  
4 ***Obstetrics & Gynecology*** 2016; 129: 76.  
5

6  
7 5. Institute of Medicine (US), National Research Council (US) Committee to Reexamine  
8 IOM Pregnancy Weight Guidelines. In: Rasmussen KM, Yaktine AL, editors. Weight Gain  
9 During Pregnancy. Washington (DC): National Academies Press. 2009.  
10

11  
12 6. Flegal K.M., Kruszon-Moran D., Carroll M.D., Fryar C.D., Ogden C.L. Trends in Obesity  
13 Among Adults in the United States, 2005 to 2014. ***JAMA*** 2016; 315: 2284-2291.  
14

15  
16 7. Caughey A.B. Gestational Weight Gain and Outcomes for Mothers and Infants. ***JAMA***  
17 2017; 317: 2175-2176.  
18

19  
20 8. Gaillard R., Steegers E.A., Franco O.H., Hofman A., Jaddoe V.W. Maternal weight gain in  
21 different periods of pregnancy and childhood cardio-metabolic outcomes. The Generation R  
22 Study. ***Int J Obes (Lond)*** 2015; 39: 677-685.  
23

24  
25 9. Retnakaran R., Wen S.W., Tan H., Zhou S., Ye C., Shen M., et al. Association of Timing  
26 of Weight Gain in Pregnancy With Infant Birth Weight. ***JAMA Pediatr*** 2018; 172: 136-142.  
27

28  
29 10. Sommer C., Morkrid K., Jenum A.K., Sletner L., Mosdol A., Birkeland K.I. Weight gain,  
30 total fat gain and regional fat gain during pregnancy and the association with gestational  
31 diabetes: a population-based cohort study. ***Int J Obes (Lond)*** 2014; 38: 76-81.  
32

33  
34 11. Baci Y., Ustuner I., Keskin H.L., Ersoy R., Avsar A.F. Effect of maternal obesity and  
35 weight gain on gestational diabetes mellitus. ***Gynecol Endocrinol*** 2013; 29: 133-136.  
36

37  
38 12. Cho E.H., Hur J., Lee K.J. Early Gestational Weight Gain Rate and Adverse Pregnancy  
39 Outcomes in Korean Women. ***Plos One*** 2015; 10: e0140376.  
40

41  
42 13. Zhang J., Tian Y., Wang W., Ouyang F., Xu J., Yu X., et al. Cohort profile: the Shanghai  
43 Birth Cohort. ***International Journal of Epidemiology*** 2019; 48: 21-21g.  
44

45  
46 14. Johansson K., Hutcheon J.A., Bodnar L.M., Cnattingius S., Stephansson O. Pregnancy  
47 weight gain by gestational age and stillbirth: a population-based cohort study. ***Bjog*** 2017; 125.  
48

49  
50 15. Collares F.M., Korevaar T.I.M., Hofman A., Steegers E.A.P., Peeters R.P., Jaddoe V.W.V.,  
51 et al. Maternal thyroid function, prepregnancy obesity and gestational weight gain-The  
52 Generation R Study: A prospective cohort study. ***Clin Endocrinol (Oxf)*** 2017; 87: 799-806.  
53

54  
55 16. Organization W.H. Obesity: preventing and managing the global epidemic. Report of a  
56 WHO consultation. 2000.  
57

58  
59 17. Berggren E.K., Groh-Wargo S., Presley L., Mouzon H.D., Catalano P.M. Maternal fat, but  
60 not lean, mass is increased among overweight/obesewomen with excess gestational weight gain.  
***American Journal of Obstetrics & Gynecology*** 2016; 214: 745.e741-745.e745.

- 1  
2  
3  
4 18. Zhu L., Zhang R., Zhang S., Shi W., Yan W., Wang X., et al. Chinese neonatal birth weight  
5 curve for different gestational age. *Chin J Pediatr* 2015; 53.  
6  
7 19. Fraser A., Tilling K., Macdonald-Wallis C., Sattar N., Brion M.-J., Benfield L., et al.  
8 Association of Maternal Weight Gain in Pregnancy With Offspring Obesity and Metabolic and  
9 Vascular Traits in Childhood. *Circulation* 2010; 121: 2557-2564.  
10  
11 20. Laitinen J., Jaaskelainen A., Hartikainen A.L., Sovio U., Vaarasmaki M., Pouta A., et al.  
12 Maternal weight gain during the first half of pregnancy and offspring obesity at 16 years: a  
13 prospective cohort study. *BJOG* 2012; 119: 716-723.  
14  
15 21. Lawlor D.A., Paul L., Abigail F., Niklas L.N.M. Does maternal weight gain in pregnancy  
16 have long-term effects on offspring adiposity? A sibling study in a prospective cohort of  
17 146,894 men from 136,050 families. *American Journal of Clinical Nutrition* 2011; 94: 142.  
18  
19 22. Starling A.P., Brinton J.T., Glueck D.H., Shapiro A.L., Harrod C.S., Lynch A.M., et al.  
20 Associations of maternal BMI and gestational weight gain with neonatal adiposity in the  
21 Healthy Start study. *Am J Clin Nutr* 2015; 101: 302-309.  
22  
23 23. MacDonald S.C., Bodnar L.M., Himes K.P., Hutcheon J.A. Patterns of Gestational Weight  
24 Gain in Early Pregnancy and Risk of Gestational Diabetes Mellitus. *Epidemiology* 2017; 28:  
25 419-427.  
26  
27 24. Tomedi L.E., Simhan H.N., Chang C.C., McTigue K.M., Bodnar L.M. Gestational weight  
28 gain, early pregnancy maternal adiposity distribution, and maternal hyperglycemia. *Matern*  
29 *Child Health J* 2014; 18: 1265-1270.  
30  
31 25. Dai Z.Y., Liu D., Li R., Wang Y., Zhang J., Liu J., et al. [Association between gestational  
32 weight gain per trimester/total gestational weight gain and gestational diabetes mellitus].  
33 *Zhonghua Liu Xing Bing Xue Za Zhi* 2016; 37: 1336-1340.  
34  
35 26. Moore Simas T.A., Waring M.E., Callaghan K., Leung K., Ward Harvey M., Buabud A.,  
36 et al. Weight gain in early pregnancy and risk of gestational diabetes mellitus among Latinas.  
37 *Diabetes Metab* 2019; 45: 26-31.  
38  
39 27. Kominiarek M.A., Saade G., Mele L., Bailit J., Reddy U.M., Wapner R.J., et al.  
40 Association Between Gestational Weight Gain and Perinatal Outcomes. *Obstet Gynecol* 2018;  
41 132: 875-881.  
42  
43 28. Yee L.M., Caughey A.B., Cheng Y.W. Association between gestational weight gain and  
44 perinatal outcomes in women with chronic hypertension. *Am J Obstet Gynecol* 2017; 217: 348  
45 e341-348 e349.  
46  
47 29. American College of Obstetricians and Gynecologists; Task Force on Hypertension in  
48  
49  
50  
51  
52  
53  
54  
55  
56  
57  
58  
59  
60

1  
2  
3  
4 Pregnancy. Hypertension in pregnancy. Report of the American College of Obstetricians and  
5 Gynecologists' Task Force on Hypertension in Pregnancy. *Obstet Gynecol* 2013; 122:1122–  
6 31.

7  
8  
9 30. Broere-Brown Z.A., Schalekamp-Timmermans S., Hofman A., Jaddoe V.W.V., Steegers  
10 E.A.P. Fetal sex dependency of maternal vascular adaptation to pregnancy: a prospective  
11 population-based cohort study. *BJOG: An International Journal of Obstetrics & Gynaecology*  
12 2015; 123: 1087-1095.

13  
14  
15 31. Torricelli M., Voltolini C., Conti N., Bocchi C., Severi F.M., Petraglia F. Weight gain  
16 regardless of pre-pregnancy BMI and influence of fetal gender in response to labor induction  
17 in postdate pregnancy. *J Matern Fetal Neonatal Med* 2013; 26: 1016-1019.

18  
19  
20 32. Nicholas L.M., Rattanatray L., MacLaughlin S.M., Ozanne S.E., Kleemann D.O., Walker  
21 S.K., et al. Differential effects of maternal obesity and weight loss in the periconceptional  
22 period on the epigenetic regulation of hepatic insulin-signaling pathways in the offspring. *The*  
23 *FASEB Journal* 2013; 27: 3786-3796.

24  
25  
26 33. Rifas-Shiman S.L., Fleisch A., Hivert M.F., Mantzoros C., Gillman M.W., Oken E. First  
27 and second trimester gestational weight gains are most strongly associated with cord blood  
28 levels of hormones at delivery important for glycemic control and somatic growth. *Metabolism*  
29 2017; 69: 112-119.

30  
31  
32 34. Arentson-Lantz E.J., Buhman K.K., Ajuwon K., Donkin S.S. Excess pregnancy weight  
33 gain leads to early indications of metabolic syndrome in a swine model of fetal programming.  
34 *Nutr Res* 2014; 34: 241-249.

35  
36  
37 35. Teede H., Harrison C., Lombard C., Boyle J., East C., Brown W. Case for Action: proposal,  
38 obesity prevention through preventing excess weight gain during pregnancy and postpartum.  
39 2015.

40  
41  
42 36. Hutcheon J.A., Bodnar L.M., Joseph K.S., Abrams B., Simhan H.N., Platt R.W. The bias  
43 in current measures of gestational weight gain. *Paediatric and Perinatal Epidemiology* 2012;  
44 26: 109-116.

45  
46  
47 37. Margerison-Zilko C.E., Shrimali B.P., Eskenazi B., Lahiff M., Lindquist A.R., Abrams B.F.  
48 Trimester of Maternal Gestational Weight Gain and Offspring Body Weight at Birth and Age  
49 Five. *Maternal & Child Health Journal* 2012; 16: 1215-1223.

**Table 1. Characteristics of pregnant women in the study cohort (n=2670).**

| Characteristic                                                      | Total Gestational Weight Gain |                    |                  | P       | Total       |
|---------------------------------------------------------------------|-------------------------------|--------------------|------------------|---------|-------------|
|                                                                     | Below<br>(n=392)              | Within<br>(n=1842) | Above<br>(n=396) |         |             |
| Maternal age (year)                                                 | 29.9 ± 3.8                    | 29.4 ± 3.5         | 28.5 ± 3.6       | <0.0001 | 29.4 ± 3.6  |
| ≥35 years                                                           | 51 (13)                       | 169 (9.2)          | 21 (5.3)         | 0.0002  | 241 (9.2)   |
| Nulliparous                                                         | 325 (82.9)                    | 1532 (83.2)        | 359 (90.7)       | 0.0027  | 2216 (84.3) |
| Education, university degree and above                              | 362 (92.6)                    | 1702 (92.5)        | 340 (85.7)       | 0.0007  | 2404 (91.5) |
| ART                                                                 | 9 (2.3)                       | 37 (2)             | 9 (2.3)          | 0.9834  | 55 (2.1)    |
| Tobacco smoking                                                     | 7 (1.8)                       | 41 (2.2)           | 24 (6.1)         | <0.0001 | 72 (2.7)    |
| Alcohol use                                                         | 52 (13.3)                     | 240 (13)           | 46 (11.6)        | 0.7221  | 338 (12.9)  |
| Pre-pregnancy BMI (kg/m <sup>2</sup> )                              | 21.7 ± 3.1                    | 21.2 ± 3.0         | 21.5 ± 2.9       | 0.0139  | 21.3 ± 3.0  |
| Underweight (< 18.5)                                                | 54 (13.8)                     | 292 (15.9)         | 50 (12.6)        |         | 396 (15.1)  |
| Normal weight (18.5-24.9)                                           | 298 (76)                      | 1372 (74.5)        | 310 (78.3)       | 0.7530  | 1980 (75.3) |
| Overweight and obese (≥ 25)                                         | 40 (10.2)                     | 178 (9.7)          | 36 (9.1)         |         | 254 (9.7)   |
| Gestational age at the first prenatal visit (week)<br>(Median, IQR) | 14 (13, 16)                   | 15 (13, 16)        | 15 (13, 16)      | 0.1986  | 15 (13, 16) |
| GWG during early pregnancy (≤17 week) (kg)                          |                               |                    |                  |         |             |
| All women                                                           | -0.2 ± 2.8                    | 2.1 ± 2.2          | 4.9 ± 3.2        | <0.0001 | 2.2 ± 2.9   |
| Underweight (< 18.5)                                                | 0.9 ± 1.9                     | 2.4 ± 2.0          | 4.8 ± 3.0        | <0.0001 | 2.5 ± 2.4   |
| Normal weight (18.5-24.9)                                           | 0.0 ± 2.8                     | 2.2 ± 2.2          | 4.9 ± 3.1        | <0.0001 | 2.3±2.8     |

|                                                  |                |                |                |         |                |
|--------------------------------------------------|----------------|----------------|----------------|---------|----------------|
| Overweight and obese ( $\geq 25$ )               | -2.2 $\pm$ 3.3 | 1.5 $\pm$ 2.6  | 4.7 $\pm$ 4.4  | <0.0001 | 1.4 $\pm$ 3.6  |
| GWG during late pregnancy (>17 week) (kg)        |                |                |                |         |                |
| All women                                        | 8.2 $\pm$ 3.0  | 12.6 $\pm$ 2.9 | 17.8 $\pm$ 3.6 | <0.0001 | 13.0 $\pm$ 3.5 |
| Underweight (< 18.5)                             | 8.9 $\pm$ 1.9  | 12.8 $\pm$ 2.5 | 18.2 $\pm$ 3.8 | <0.0001 | 13.0 $\pm$ 3.5 |
| Normal weight (18.5-24.9)                        | 8.4 $\pm$ 3.0  | 12.8 $\pm$ 2.8 | 17.8 $\pm$ 3.6 | <0.0001 | 12.9 $\pm$ 4.0 |
| Overweight and obese ( $\geq 25$ )               | 5.8 $\pm$ 3.3  | 10.8 $\pm$ 3.8 | 17.4 $\pm$ 3.8 | <0.0001 | 11.0 $\pm$ 4.9 |
| Gestational age at delivery (week) (Median, IQR) | 39 (38, 40)    | 39 (38, 40)    | 39 (38, 40)    | 0.0793  | 39 (38, 40)    |
| Birth weight (gm)                                | 3238 $\pm$ 422 | 3370 $\pm$ 438 | 3540 $\pm$ 480 | <0.0001 | 3376 $\pm$ 450 |
| Infant gender (male)                             | 194 (50.4)     | 945 (52)       | 195 (49.5)     | 0.7951  | 1334 (51.4)    |

Data are mean  $\pm$  SD or n (%) unless otherwise specified.

SD: standard deviation; BMI: body mass index; ART: assisted reproductive technology; GWG: gestational weight gain



## Figure Legend

### Figure 1. Study flow chart.

### Figure 2. Associations of gestational weight gain with pregnancy outcomes.

(A) Associations of early gestational weight gain ( $\leq 17$  week) with pregnancy outcomes. (B) Associations of late gestational weight gain ( $> 17$  week) with pregnancy outcomes. (C) Associations of total gestational weight gain with pregnancy outcomes.

NICU: neonatal intensive care unit; LGA: large for gestational age; SGA: small for gestational age; GDM: gestational diabetes mellitus; PIH: pregnancy-induced hypertension; GWG: gestational weight gain; ARR: adjusted relative risk. \* $< 0.05$

Average GWG group as the reference.

<sup>a1</sup> The analysis was adjusted for maternal age, parity, pre-pregnancy BMI and length of gestation.

<sup>b1</sup> The analysis was adjusted for parity, pre-pregnancy BMI, fetal sex, GDM and PIH.

<sup>c1</sup> The analysis was adjusted for pre-pregnancy BMI, fetal sex, alcohol/tobacco use, length of gestation, GDM and PIH.

<sup>d1</sup> The analysis was adjusted for maternal age, alcohol/tobacco use, GDM and PIH.

<sup>a2</sup> The analysis was adjusted for maternal age and pre-pregnancy BMI.;

<sup>b2</sup> The analysis was adjusted for parity, pre-pregnancy BMI, fetal sex and length of gestation.

<sup>c2</sup> The analysis was adjusted for maternal age, parity, pre-pregnancy BM, GDM and PIH.

<sup>d2</sup> The analysis was adjusted for parity, pre-pregnancy BMI, fetal sex, GDM and PIH.

<sup>e2</sup> The analysis was adjusted for parity, pre-pregnancy BMI, alcohol/tobacco use, length of gestation, GDM and PIH.

<sup>f2</sup> The analysis was adjusted for maternal age, alcohol/tobacco use and length of gestation.

<sup>a3</sup> The analysis was adjusted for maternal age, parity, pre-pregnancy BMI, alcohol/tobacco use and fetal sex.

<sup>b3</sup> The analysis was adjusted for parity, pre-pregnancy BMI and length of gestation.

<sup>c3</sup> The analysis was adjusted for parity, pre-pregnancy BMI, length of gestation, GDM and PIH.

<sup>d3</sup> The analysis was adjusted for maternal age, parity and length of gestation.

<sup>e3</sup> The analysis was adjusted for pre-pregnancy BMI, fetal sex, length of gestation, GDM and PIH.

1  
2  
3  
4 **Figure 3. Associations of late gestational weight gain (>17 week) with pregnancy**  
5  
6 **outcomes, stratified by fetal sex.**  
7

8  
9 NICU: neonatal intensive care unit; LGA: large for gestational age; SGA: small for gestational age; GDM:  
10 gestational diabetes mellitus; PIH: pregnancy-induced hypertension; GWG: gestational weight gain; ARR:  
11 adjusted relative risk.  
12

13  
14 \* $<0.05$   
15

16 Average GWG group as the reference.

17 <sup>a</sup> The analysis was adjusted for maternal age and pre-pregnancy BMI.

18  
19 <sup>b</sup> The analysis was adjusted for maternal age, parity, pre-pregnancy BMI, alcohol/tobacco use and length of  
20 gestation.  
21

22  
23 <sup>c</sup> The analysis was adjusted for maternal age, pre-pregnancy BMI, GDM and PIH.

24  
25 <sup>d</sup> The analysis was adjusted for parity, pre-pregnancy BMI, alcohol/tobacco use and length of gestation.

26  
27 <sup>e</sup> The analysis was adjusted for parity, alcohol/tobacco use, length of gestation, GDM and PIH.

28  
29 <sup>f</sup> The analysis was adjusted for parity, pre-pregnancy BMI, length of gestation, GDM and PIH.  
30  
31  
32  
33  
34  
35  
36  
37  
38  
39  
40  
41  
42  
43  
44  
45  
46  
47  
48  
49  
50  
51  
52  
53  
54  
55  
56  
57  
58  
59  
60

1  
2  
3  
4  
5  
6  
7  
8  
9  
10  
11  
12  
13  
14  
15  
16  
17  
18  
19  
20  
21  
22  
23  
24  
25  
26  
27  
28  
29  
30  
31  
32  
33  
34  
35  
36  
37  
38  
39  
40  
41  
42  
43  
44  
45  
46  
47  
48  
49  
50  
51  
52  
53  
54  
55  
56  
57  
58  
59  
60

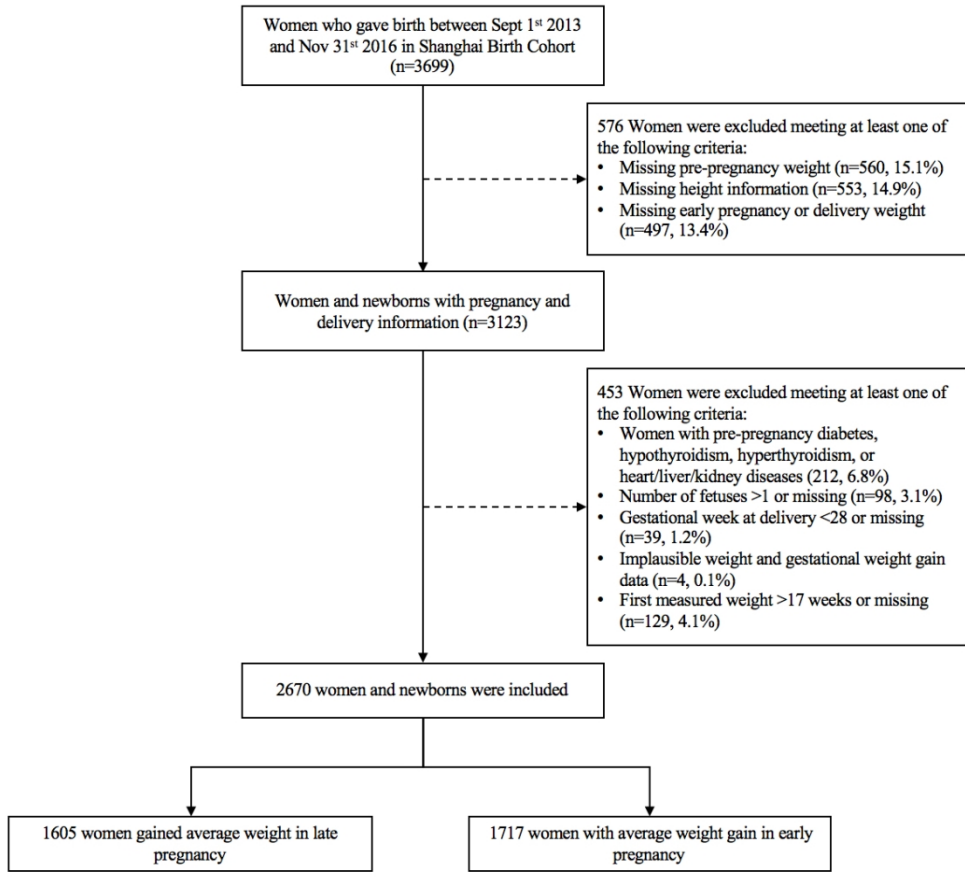

Figure 1. Study flow chart.

214x189mm (144 x 144 DPI)

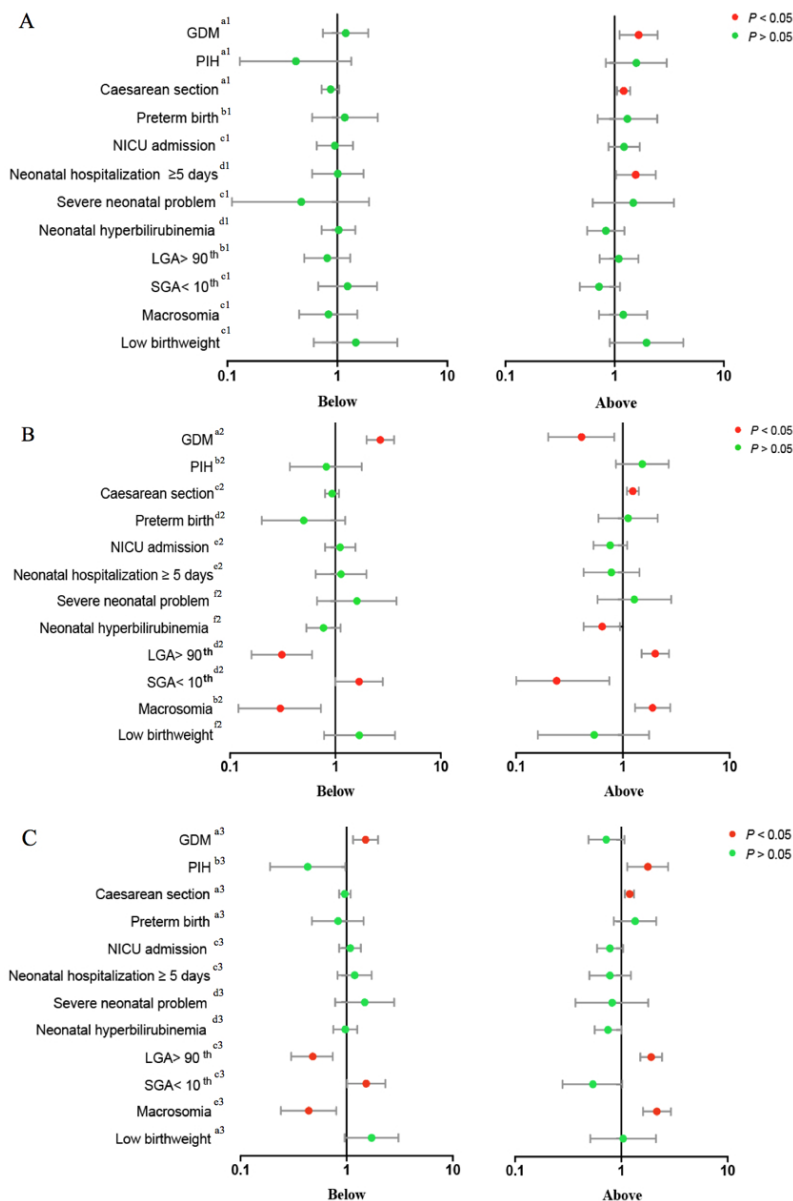

Figure 2. Associations of gestational weight gain with pregnancy outcomes. (A) Associations of early gestational weight gain ( $\leq 17$  week) with pregnancy outcomes. (B) Associations of late gestational weight gain ( $> 17$  week) with pregnancy outcomes. (C) Associations of total gestational weight gain with pregnancy outcomes. NICU: neonatal intensive care unit; LGA: large for gestational age; SGA: small for gestational age; GDM: gestational diabetes mellitus; PIH: pregnancy-induced hypertension; GWG: gestational weight gain; ARR: adjusted relative risk.  $* < 0.05$

Average GWG group as the reference.

a1 The analysis was adjusted for maternal age, parity, pre-pregnancy BMI and length of gestation.

b1 The analysis was adjusted for parity, pre-pregnancy BMI, fetal sex, GDM and PIH.

c1 The analysis was adjusted for pre-pregnancy BMI, fetal sex, alcohol/tobacco use, length of gestation, GDM and PIH.

d1 The analysis was adjusted for maternal age, alcohol/tobacco use, GDM and PIH.

- 1  
2  
3 a2 The analysis was adjusted for maternal age and pre-pregnancy BMI.;
- 4 b2 The analysis was adjusted for parity, pre-pregnancy BMI, fetal sex and length of gestation.
- 5 c2 The analysis was adjusted for maternal age, parity, pre-pregnancy BM, GDM and PIH.
- 6 d2 The analysis was adjusted for parity, pre-pregnancy BMI, fetal sex, GDM and PIH.
- 7 e2 The analysis was adjusted for parity, pre-pregnancy BMI, alcohol/tobacco use, length of gestation, GDM  
and PIH.
- 8 f2 The analysis was adjusted for maternal age, alcohol/tobacco use and length of gestation.
- 9 a3 The analysis was adjusted for maternal age, parity, pre-pregnancy BMI, alcohol/tobacco use and fetal  
10 sex.
- 11 b3 The analysis was adjusted for parity, pre-pregnancy BMI and length of gestation.
- 12 c3 The analysis was adjusted for parity, pre-pregnancy BMI, length of gestation, GDM and PIH.
- 13 d3 The analysis was adjusted for maternal age, parity and length of gestation.
- 14 e3 The analysis was adjusted for pre-pregnancy BMI, fetal sex, length of gestation, GDM and PIH.

15 147x222mm (144 x 144 DPI)

16  
17  
18  
19  
20  
21  
22  
23  
24  
25  
26  
27  
28  
29  
30  
31  
32  
33  
34  
35  
36  
37  
38  
39  
40  
41  
42  
43  
44  
45  
46  
47  
48  
49  
50  
51  
52  
53  
54  
55  
56  
57  
58  
59  
60

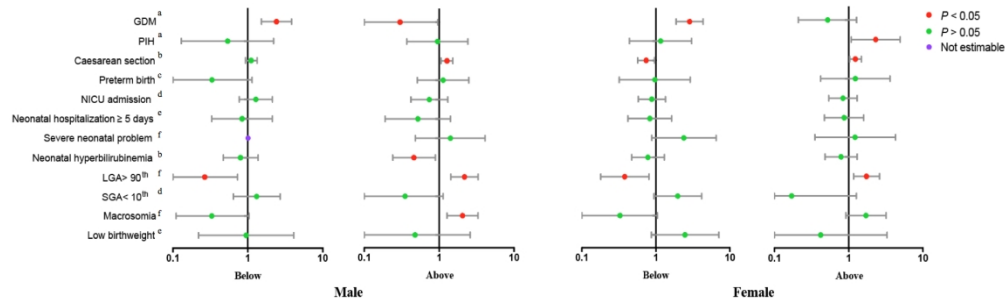

Figure 3. Associations of late gestational weight gain (>17 week) with pregnancy outcomes, stratified by fetal sex.

NICU: neonatal intensive care unit; LGA: large for gestational age; SGA: small for gestational age; GDM: gestational diabetes mellitus; PIH: pregnancy-induced hypertension; GWG: gestational weight gain; ARR: adjusted relative risk.

\* < 0.05

Average GWG group as the reference.

a The analysis was adjusted for maternal age and pre-pregnancy BMI.

b The analysis was adjusted for maternal age, parity, pre-pregnancy BMI, alcohol/tobacco use and length of gestation.

c The analysis was adjusted for maternal age, pre-pregnancy BMI, GDM and PIH.

d The analysis was adjusted for parity, pre-pregnancy BMI, alcohol/tobacco use and length of gestation.

e The analysis was adjusted for parity, alcohol/tobacco use, length of gestation, GDM and PIH.

f The analysis was adjusted for parity, pre-pregnancy BMI, length of gestation, GDM and PIH.

324x99mm (144 x 144 DPI)

**Table S1. Maternal Characteristics in the study of GWG at early pregnancy (n=1605).**

| Characteristic                                     | Gestational Weight Gain During Early Pregnancy ( $\leq 17$ week) |                   |                | <i>P</i> |
|----------------------------------------------------|------------------------------------------------------------------|-------------------|----------------|----------|
|                                                    | Below<br>n=186                                                   | Average<br>n=1233 | Above<br>n=186 |          |
| Maternal age (year)                                | 28.2 $\pm$ 3.4                                                   | 29.4 $\pm$ 3.7    | 29.4 $\pm$ 3.5 | 0.0002   |
| $\geq 35$ years                                    | 11 (5.9)                                                         | 126 (10.2)        | 14 (7.5)       | 0.5946   |
| Nulliparous                                        | 165 (88.7)                                                       | 1011 (82)         | 155 (83.3)     | 0.1683   |
| Education, university degree and above             | 164 (88.1)                                                       | 1138 (92.4)       | 162 (87.6)     | 0.8411   |
| ART                                                | 4 (2.2)                                                          | 27 (2.2)          | 5 (2.7)        | 0.9110   |
| Tobacco smoking                                    | 4 (2.2)                                                          | 26 (2.1)          | 9 (4.8)        | 0.0924   |
| Alcohol use                                        | 15 (8.1)                                                         | 129 (10.5)        | 18 (9.37)      | 0.5876   |
| Pre-pregnancy BMI (kg/m <sup>2</sup> )             | 21.8 $\pm$ 3.1                                                   | 21.2 $\pm$ 3.0    | 21.7 $\pm$ 3.1 | 0.0027   |
| Underweight (< 18.5)                               | 28 (15.1)                                                        | 193 (15.7)        | 28 (15.1)      |          |
| Normal weight (18.5-24.9)                          | 134 (72)                                                         | 929 (75.3)        | 133 (71.5)     | 0.9848   |
| Overweight and obese ( $\geq 25$ )                 | 24 (12.9)                                                        | 111 (9)           | 25 (13.4)      |          |
| Gestational age at the first prenatal visit (week) | 14 (13, 16)                                                      | 14 (13, 16)       | 15 (13, 16)    | 0.8298   |
| (Median, IQR)                                      |                                                                  |                   |                |          |
| GWG during early pregnancy (kg)                    |                                                                  |                   |                |          |
| All women                                          | -2.5 $\pm$ 2.0                                                   | 2.1 $\pm$ 1.5     | 6.7 $\pm$ 2.1  | <0.0001  |
| Underweight (< 18.5)                               | -0.6 $\pm$ 1.1                                                   | 2.1 $\pm$ 1.2     | 6.4 $\pm$ 2.1  | <0.0001  |

|                                                  |             |             |             |         |
|--------------------------------------------------|-------------|-------------|-------------|---------|
| Normal weight (18.5-24.9)                        | -2.5±1.7    | 2.1 ± 1.5   | 7.0 ± 2.1   | <0.0001 |
| Overweight and obese (≥ 25)                      | -4.7±1.7    | 1.5 ± 1.8   | 5.7 ± 1.7   | <0.0001 |
| GWG during the late pregnancy (kg)               |             |             |             |         |
| All women                                        | 12.5 ± 2.3  | 12.6 ± 2.3  | 12.3 ± 2.4  | 0.4854  |
| Underweight (< 18.5)                             | 12.4 ± 1.9  | 12.7 ± 1.9  | 12.5 ± 1.8  | 0.6323  |
| Normal weight (18.5-24.9)                        | 12.8 ± 2.2  | 12.7 ± 2.2  | 12.6 ± 2.1  | 0.8492  |
| Overweight and obese (≥ 25)                      | 10.7 ± 2.2  | 11.1 ± 3.1  | 10.4 ± 3.3  | 0.5676  |
| Gestational age at delivery (week) (Median, IQR) | 39 (38, 40) | 39 (38, 40) | 39 (38, 40) | 0.9126  |
| Birth weight (g)                                 | 3296 ± 435  | 3370 ± 446  | 3382 ± 515  | 0.0428  |
| Infant sex (male)                                | 92 (50.3)   | 646 (53.2)  | 102 (55.4)  | 0.6091  |

Data are mean ± SD or n (%) unless otherwise specified.

SD: standard deviation; BMI: body mass index; ART: assisted reproductive technology; GWG: gestational weight gain



**Table S2. Maternal Characteristics in the study of GWG at late pregnancy (n=1717).**

| Characteristic                                       | Gestational Weight Gain During Late Pregnancy (>17 week) |                   |                | <i>P</i> |
|------------------------------------------------------|----------------------------------------------------------|-------------------|----------------|----------|
|                                                      | Below<br>n=236                                           | Average<br>n=1233 | Above<br>n=248 |          |
| Maternal age (year)                                  | 30.4 ± 3.8                                               | 29.4 ± 3.7        | 27.9 ± 3.5     | <0.0001  |
| ≥35 years                                            | 37 (15.7)                                                | 126 (10.2)        | 10 (4)         | <0.0001  |
| Nulliparous                                          | 183 (77.5)                                               | 1011 (82)         | 234 (94.4)     | <0.0001  |
| Education, university degree and above               | 222 (94.1)                                               | 1138 (92.4)       | 214 (86.3)     | 0.0017   |
| ART                                                  | 7 (3)                                                    | 27 (2.2)          | 6 (2.4)        | 0.7701   |
| Tobacco smoking                                      | 4 (1.7)                                                  | 26 (2.1)          | 12 (4.8)       | 0.0234   |
| Alcohol use                                          | 20 (8.5)                                                 | 129 (10.5)        | 20 (8.1)       | 0.3841   |
| Pre-pregnancy BMI (kg/m <sup>2</sup> ) (Median, IQR) | 21.6±3.1                                                 | 21.2±3.0          | 21.4±3.1       | 0.0564   |
| Underweight (< 18.5)                                 | 29 (12.3)                                                | 193 (15.7)        | 37 (14.9)      |          |
| Normal weight (18.5-24.9)                            | 178 (75.4)                                               | 929 (75.3)        | 189 (76.2)     | 0.3711   |
| Overweight and obese (≥ 25)                          | 29 (12.3)                                                | 111 (9)           | 22 (8.9)       |          |
| Gestational age at the first prenatal visit (week)   | 14 (13, 16)                                              | 14 (13, 16)       | 14 (13, 16)    | 0.4231   |
| GWG during early pregnancy (kg)                      |                                                          |                   |                |          |
| All women                                            | 2.1±1.5                                                  | 2.1 ± 1.5         | 2.3 ± 1.4      | 0.1943   |
| Underweight (< 18.5)                                 | 2.7±1.4                                                  | 2.1 ± 1.2         | 2.8 ± 1.3      | 0.0009   |
| Normal weight (18.5-24.9)                            | 2.1±1.5                                                  | 2.1 ± 1.5         | 2.2 ± 1.5      | 0.7273   |

|                                                  |                |                |                |         |
|--------------------------------------------------|----------------|----------------|----------------|---------|
| Overweight and obese ( $\geq 25$ )               | 1.5 $\pm$ 1.6  | 1.5 $\pm$ 1.8  | 2.1 $\pm$ 1.2  | 0.2109  |
| GWG during the late pregnancy (kg)               |                |                |                |         |
| All women                                        | 7.0 $\pm$ 2.1  | 12.6 $\pm$ 2.3 | 19.1 $\pm$ 2.4 | <0.0001 |
| Underweight (< 18.5)                             | 7.9 $\pm$ 1.2  | 12.7 $\pm$ 1.9 | 19.2 $\pm$ 2.6 | <0.0001 |
| Normal weight (18.5-24.9)                        | 7.3 $\pm$ 1.9  | 12.7 $\pm$ 2.2 | 19.1 $\pm$ 2.2 | <0.0001 |
| Overweight and obese ( $\geq 25$ )               | 4.1 $\pm$ 1.9  | 11.1 $\pm$ 3.1 | 18.3 $\pm$ 3.2 | <0.0001 |
| Gestational age at delivery (week) (Median, IQR) | 39 (38, 40)    | 39 (38, 40)    | 39 (38, 40)    | 0.0872  |
| Birth weight (g)                                 | 3261 $\pm$ 397 | 3370 $\pm$ 446 | 3536 $\pm$ 461 | <0.0001 |
| Infant sex (male)                                | 110 (47.8)     | 646 (53.2)     | 120 (49)       | 0.8381  |

Data are mean  $\pm$  SD or n (%) unless otherwise specified.

SD: standard deviation. BMI: body mass index; ART: assisted reproductive technology; GWG: gestational weight gain.

**Table S3. Pregnancy outcomes by gestational weight gain during early pregnancy**

| Outcome                                | Gestational Weight Gain During Early Pregnancy ( $\leq 17$ week) |                           |            |            |                           |
|----------------------------------------|------------------------------------------------------------------|---------------------------|------------|------------|---------------------------|
|                                        | Below                                                            |                           | Average    |            | Above                     |
|                                        | n (%)                                                            | Unadjusted RR<br>(95% CI) | n (%)      | n (%)      | Unadjusted RR<br>(95% CI) |
| GDM                                    | 18 (9.7)                                                         | 1.23 (0.76, 1.99)         | 97 (7.9)   | 25 (13.4)  | 1.71 (1.13, 2.58)*        |
| PIH                                    | 3 (1.6)                                                          | 0.45 (0.14, 1.44)         | 44 (3.6)   | 11 (5.9)   | 1.66 (0.87, 3.15)         |
| Caesarean section                      | 71 (41)                                                          | 0.87 (0.72, 1.05)         | 548 (47.3) | 101 (56.7) | 1.20 (1.04, 1.38)*        |
| Preterm birth                          | 9 (4.8)                                                          | 1.10 (0.55, 2.20)         | 54 (4.4)   | 11 (5.9)   | 1.35 (0.72, 2.53)         |
| NICU admission                         | 24 (12.9)                                                        | 0.95 (0.64, 1.41)         | 168 (13.6) | 31 (16.7)  | 1.22 (0.86, 1.74)         |
| Neonatal hospitalization $\geq 5$ days | 12 (6.5)                                                         | 1.12 (0.62, 2.03)         | 71 (5.8)   | 17 (9.1)   | 1.59 (0.96, 2.63)         |
| Severe neonatal problem                | 2 (1.1)                                                          | 0.51 (0.12, 2.13)         | 26 (2.1)   | 6 (3.2)    | 1.53 (0.64, 3.67)         |
| Neonatal hyperbilirubinemia            | 30 (16.1)                                                        | 1.04 (0.73, 1.48)         | 191 (15.5) | 24 (12.9)  | 0.83 (0.56, 1.24)         |
| LGA $> 90^{\text{th}}$                 | 17 (9.3)                                                         | 0.85 (0.53, 1.38)         | 132 (10.9) | 23 (12.5)  | 1.15 (0.76, 1.74)         |
| SGA $< 10^{\text{th}}$                 | 11 (6)                                                           | 1.21 (0.65, 2.26)         | 60 (5)     | 8 (4.3)    | 0.62 (0.36, 1.09)         |
| Macrosomia                             | 11 (5.9)                                                         | 0.86 (0.47, 1.59)         | 84 (6.9)   | 16 (8.6)   | 1.26 (0.75, 2.10)         |
| Low birthweight                        | 6 (3.2)                                                          | 1.52 (0.64, 3.65)         | 26 (2.1)   | 8 (4.3)    | 2.03 (0.93, 4.42)         |

NICU: neonatal intensive care unit; LGA: large for gestational age; SGA: small for gestational age; GDM: gestational diabetes mellitus; PIH: pregnancy-induced hypertension; GWG: gestational weight gain. \* $<0.05$

**Table S4. Pregnancy outcomes by gestational weight gain in late pregnancy**

| Outcome                          | Gestational Weight Gain During Late Pregnancy (>17 week) |                           |            |            |                           |
|----------------------------------|----------------------------------------------------------|---------------------------|------------|------------|---------------------------|
|                                  | Below                                                    |                           | Average    | Above      |                           |
|                                  | n (%)                                                    | Unadjusted RR<br>(95% CI) | n (%)      | n (%)      | Unadjusted RR<br>(95% CI) |
| GDM                              | 52 (22)                                                  | 2.80 (2.06, 3.81)*        | 97 (7.9)   | 8 (3.2)    | 0.41 (0.20, 0.83)*        |
| PIH                              | 7 (3)                                                    | 0.83 (0.38, 1.83)         | 44 (3.6)   | 15 (6.1)   | 1.69 (0.96, 3.00)         |
| Caesarean section                | 105 (46.9)                                               | 0.99 (0.85, 1.15)         | 548 (47.3) | 129 (56.3) | 1.19 (1.05, 1.35)*        |
| Preterm birth                    | 6 (2.5)                                                  | 0.58 (0.25, 1.33)         | 54 (4.4)   | 12 (4.8)   | 1.10 (0.60, 2.03)         |
| NICU admission                   | 35 (14.8)                                                | 1.09 (0.78, 1.52)         | 168 (13.6) | 27 (10.9)  | 0.80 (0.54, 1.17)         |
| Neonatal hospitalization ≥5 days | 14 (5.9)                                                 | 1.03 (0.59, 1.80)         | 71 (5.8)   | 11 (4.4)   | 0.77 (0.41, 1.43)         |
| Severe neonatal problem          | 6 (2.5)                                                  | 1.21 (0.50, 2.90)         | 26 (2.1)   | 7 (2.8)    | 1.34 (0.59, 3.05)         |
| Neonatal hyperbilirubinemia      | 28 (11.9)                                                | 0.77 (0.53, 1.11)         | 191 (15.5) | 25 (10.1)  | 0.65 (0.44, 0.96)*        |
| LGA > 90 <sup>th</sup>           | 9 (3.9)                                                  | 0.36 (0.19, 0.69)*        | 132 (10.9) | 51 (20.8)  | 1.91 (1.43, 2.56)*        |
| SGA < 10 <sup>th</sup>           | 17 (7.4)                                                 | 1.49 (0.89, 2.51)         | 60 (5)     | 3 (1.2)    | 0.25 (0.08, 0.78)*        |
| Macrosomia                       | 5 (2.1)                                                  | 0.31 (0.13, 0.76)*        | 84 (6.9)   | 31 (12.6)  | 1.83 (1.24, 2.70)*        |
| Low birthweight                  | 8 (3.4)                                                  | 1.61 (0.74, 3.50)         | 26 (2.1)   | 3 (1.2)    | 0.57 (0.17, 1.88)         |

NICU: neonatal intensive care unit; LGA: large for gestational age; SGA: small for gestational age; GDM: gestational diabetes mellitus; PIH: pregnancy-induced hypertension; GWG: gestational weight gain. \* < 0.05

Table S5. Pregnancy outcomes by total gestational weight gain, stratified by fetal sex.

| Gestational Weight Gain During Late Pregnancy (>17 week) |                  |                                 |            |                  |                           |                                 |                           |                  |           |                           |
|----------------------------------------------------------|------------------|---------------------------------|------------|------------------|---------------------------|---------------------------------|---------------------------|------------------|-----------|---------------------------|
| Outcomes                                                 | Male             |                                 |            |                  |                           | Female                          |                           |                  |           |                           |
|                                                          | Below<br>(n=110) | Within<br>(Referent)<br>(n=646) |            | Above<br>(n=120) | Below<br>(n=120)          | Within<br>(Referent)<br>(n=569) |                           | Above<br>(n=125) |           |                           |
|                                                          | n (%)            | Unadjusted<br>RR (95% CI)       | n (%)      | n (%)            | Unadjusted<br>RR (95% CI) | n (%)                           | Unadjusted<br>RR (95% CI) | n (%)            | n (%)     | Unadjusted<br>RR (95% CI) |
| GDM                                                      | 21 (19.1)        | 2.33<br>(1.46, 3.70)*           | 53 (8.2)   | 3 (2.5)          | 0.30<br>(0.10, 0.96)      | 29 (24.2)                       | 3.20<br>(2.08, 4.91)*     | 43 (7.6)         | 5 (4)     | 0.53<br>(0.21, 1.31)      |
| PIH                                                      | 2 (1.8)          | 0.47<br>(0.11, 1.96)            | 25 (3.9)   | 5 (4.2)          | 1.08<br>(0.42, 2.76)      | 5 (4.2)                         | 1.25<br>(0.48, 3.28)      | 19 (3.3)         | 9 (7.2)   | 2.16<br>(1.00, 4.65)      |
| Caesarean section                                        | 61 (57)          | 1.20<br>(0.99, 1.44)            | 291 (47.5) | 62 (56.4)        | 1.19<br>(1.00, 1.43)*     | 41 (36.6)                       | 0.77<br>(0.60, 1.00)      | 250 (47.3)       | 66 (56.4) | 1.19<br>(0.99, 1.43)      |
| Preterm birth                                            | 1 (0.9)          | 0.17<br>(0.02, 1.21)            | 35 (5.4)   | 7 (5.8)          | 1.08<br>(0.49, 2.37)      | 4 (3.3)                         | 1.12<br>(0.38, 3.26)      | 17 (3)           | 4 (3.2)   | 1.07<br>(0.37, 3.13)      |
| NICU admission                                           | 16 (14.6)        | 1.09<br>(0.67, 1.79)            | 86 (13.3)  | 12 (10)          | 0.75<br>(0.42, 1.33)      | 16 (13.3)                       | 1.01<br>(0.61, 1.67)      | 75 (13.2)        | 14 (11.2) | 0.85<br>(0.50, 1.45)      |
| Neonatal hospitalization $\geq 5$ days                   | 5 (4.6)          | 0.70<br>(0.28, 1.73)            | 42 (6.5)   | 4 (3.3)          | 0.51<br>(0.19, 1.40)      | 6 (5)                           | 1.02<br>(0.43, 2.40)      | 28 (4.9)         | 7 (5.6)   | 1.14<br>(0.51, 2.55)      |
| Severe neonatal problem                                  | 0                | NA                              | 17 (2.6)   | 4 (3.3)          | 1.27                      | 5 (4.2)                         | 2.63                      | 9 (1.6)          | 3 (2.4)   | 1.52                      |

|    |                             |               |            |           |               |           |              |           |               |
|----|-----------------------------|---------------|------------|-----------|---------------|-----------|--------------|-----------|---------------|
| 1  |                             |               |            |           |               |           |              |           |               |
| 2  |                             |               |            |           | (0.43, 3.70)  |           | (0.90, 7.72) |           | (0.42, 5.52)  |
| 3  |                             |               |            |           |               |           |              |           |               |
| 4  |                             | 0.76          |            |           | 0.48          |           | 0.79         |           | 0.81          |
| 5  | Neonatal hyperbilirubinemia | 13 (11.8)     | 100 (15.5) | 9 (7.5)   | (0.25, 0.93)* | 15 (12.5) | (0.47, 1.32) | 90 (15.8) | 16 (12.8)     |
| 6  |                             | (0.44, 1.31)  |            |           |               |           |              |           | (0.49, 1.33)  |
| 7  |                             |               |            |           |               |           |              |           |               |
| 8  |                             | 0.19          |            |           | 2.16          |           | 0.47         |           | 1.69          |
| 9  | LGA > 90 <sup>th</sup>      | 2 (1.8)       | 62 (9.7)   | 25 (20.8) | (1.42, 3.29)* | 7 (5.8)   | (0.22, 1.01) | 70 (12.3) | 26 (20.8)     |
| 10 |                             | (0.05, 0.76)* |            |           |               |           |              |           | (1.13, 2.54)* |
| 11 |                             |               |            |           |               |           |              |           |               |
| 12 | SGA < 10 <sup>th</sup>      | 8 (7.3)       | 37 (5.8)   | 2 (1.7)   | (0.07, 1.18)  | 9 (7.5)   | (0.88, 3.91) | 23 (4)    | 1 (0.8)       |
| 13 |                             | (0.60, 2.64)  |            |           |               |           |              |           | (0.03, 1.45)  |
| 14 |                             |               |            |           |               |           |              |           |               |
| 15 |                             | 0.35          |            |           | 2.03          |           | 0.29         |           | 1.66          |
| 16 | Macrosomia                  | 3 (2.7)       | 50 (7.8)   | 19 (15.8) | (1.24, 3.32)* | 2 (1.7)   | (0.07, 1.18) | 33 (5.8)  | 12 (9.6)      |
| 17 |                             | (0.11, 1.10)  |            |           |               |           |              |           | (0.88, 3.11)  |
| 18 |                             |               |            |           |               |           |              |           |               |
| 19 | Low birthweight             | 2 (1.8)       | 14 (2.2)   | 1 (0.8)   | 0.38          | 5 (4.2)   | 2.37         | 10 (1.8)  | 1 (0.8)       |
| 20 |                             | (0.19, 3.62)  |            |           | (0.05, 2.88)  |           | (0.83, 6.81) |           | (0.06, 3.52)  |

21  
 22 NICU: neonatal intensive care unit; LGA: large for gestational age; SGA: small for gestational age; GDM: gestational diabetes mellitus; PIH: pregnancy-induced  
 23 hypertension; GWG: gestational weight gain. \* < 0.05  
 24  
 25  
 26  
 27  
 28  
 29  
 30  
 31  
 32  
 33  
 34  
 35  
 36  
 37  
 38  
 39  
 40  
 41  
 42  
 43  
 44  
 45  
 46

**Table S6. Pregnancy outcomes by total gestational weight gain**

| Outcome                                | Total Gestational Weight Gain |                           |            |            |                           |
|----------------------------------------|-------------------------------|---------------------------|------------|------------|---------------------------|
|                                        | Below                         |                           | Average    | Above      |                           |
|                                        | n (%)                         | Unadjusted RR<br>(95% CI) | n (%)      | n (%)      | Unadjusted RR<br>(95% CI) |
| GDM                                    | 60 (15.3)                     | 1.60 (1.22, 2.10)*        | 176 (9.6)  | 27 (6.8)   | 0.71 (0.48, 1.05)         |
| PIH                                    | 6 (1.5)                       | 0.43 (0.19, 0.99)*        | 65 (3.5)   | 26 (6.6)   | 1.86 (1.20, 2.89)*        |
| Caesarean section                      | 163 (45)                      | 1.00 (0.88, 1.13)         | 778 (45.2) | 203 (55.5) | 1.22 (1.10, 1.36)*        |
| Preterm birth                          | 15 (3.8)                      | 0.87 (0.51, 1.49)         | 81 (4.4)   | 22 (5.6)   | 1.26 (0.80, 2.00)         |
| NICU admission                         | 61 (15.6)                     | 1.12 (0.86, 1.44)         | 257 (14)   | 45 (11.4)  | 0.81 (0.60, 1.10)         |
| Neonatal hospitalization $\geq 5$ days | 27 (6.9)                      | 1.19 (0.79, 1.78)         | 107 (5.8)  | 19 (4.8)   | 0.83 (0.51, 1.33)         |
| Severe neonatal problem                | 11 (2.8)                      | 1.40 (0.72, 2.71)         | 37 (2)     | 7 (1.8)    | 0.88 (0.40, 1.96)         |
| Neonatal hyperbilirubinemia            | 58 (14.8)                     | 0.96 (0.74, 1.24)         | 285 (15.5) | 47 (11.9)  | 0.77 (0.57, 1.02)         |
| LGA > 90 <sup>th</sup>                 | 20 (5.2)                      | 0.49 (0.31, 0.77)*        | 192 (10.6) | 80 (20.4)  | 1.92 (1.52, 2.44)*        |
| SGA < 10 <sup>th</sup>                 | 27 (7)                        | 1.46 (0.96, 2.22)         | 87 (4.8)   | 10 (2.5)   | 0.53 (0.28, 1.01)         |
| Macrosomia                             | 11 (2.8)                      | 0.45 (0.24, 0.83)*        | 115 (6.3)  | 53 (13.5)  | 2.15 (1.58, 2.93)*        |
| Low birthweight                        | 15 (3.8)                      | 1.72 (0.96, 3.07)         | 41 (2.2)   | 9 (2.3)    | 1.03 (0.50, 2.09)         |

NICU: neonatal intensive care unit; LGA: large for gestational age; SGA: small for gestational age; GDM: gestational diabetes mellitus; PIH: pregnancy-induced hypertension; GWG: gestational weight gain. \* $<0.05$

# BMJ Open

## Gestational weight gain and adverse pregnancy outcomes: a prospective cohort study

|                                 |                                                                                                                                                                                                                                                                                                                                                                                                                                                                                                                                                                                                                                                                                                                                                                                 |
|---------------------------------|---------------------------------------------------------------------------------------------------------------------------------------------------------------------------------------------------------------------------------------------------------------------------------------------------------------------------------------------------------------------------------------------------------------------------------------------------------------------------------------------------------------------------------------------------------------------------------------------------------------------------------------------------------------------------------------------------------------------------------------------------------------------------------|
| Journal:                        | <i>BMJ Open</i>                                                                                                                                                                                                                                                                                                                                                                                                                                                                                                                                                                                                                                                                                                                                                                 |
| Manuscript ID                   | bmjopen-2020-038187.R1                                                                                                                                                                                                                                                                                                                                                                                                                                                                                                                                                                                                                                                                                                                                                          |
| Article Type:                   | Original research                                                                                                                                                                                                                                                                                                                                                                                                                                                                                                                                                                                                                                                                                                                                                               |
| Date Submitted by the Author:   | 11-Jun-2020                                                                                                                                                                                                                                                                                                                                                                                                                                                                                                                                                                                                                                                                                                                                                                     |
| Complete List of Authors:       | Wu, Yuelin; Shanghai First Maternity and infant hospital, Department of Obstetrics<br>Wan, Sheng; Shanghai First Maternity and infant hospital, Department of Obstetrics<br>Gu, Shengyi; Xinhua Hospital, Shanghai Jiao Tong University School of Medicine, Department of Obstetrics and Gynecology<br>Mou, Zhengqian; Xinhua Hospital, Shanghai Jiao Tong University School of Medicine, Department of Obstetrics and Gynecology<br>Dong, Lingling; Shanghai First Maternity and infant hospital, Department of Obstetrics<br>Luo, Zhong-Cheng; Lunenfeld-Tanenbaum Research Institute, Obstetrics and Gynecology, Mount Sinai Hospital<br>Zhang, Jun ; Shanghai Jiao Tong University,<br>Hua, Xiaolin; Shanghai First Maternity and infant hospital, Department of Obstetrics |
| <b>Primary Subject Heading</b>: | Obstetrics and gynaecology                                                                                                                                                                                                                                                                                                                                                                                                                                                                                                                                                                                                                                                                                                                                                      |
| Secondary Subject Heading:      | Obstetrics and gynaecology                                                                                                                                                                                                                                                                                                                                                                                                                                                                                                                                                                                                                                                                                                                                                      |
| Keywords:                       | EPIDEMIOLOGY, Maternal medicine < OBSTETRICS, Fetal medicine < OBSTETRICS, OBSTETRICS                                                                                                                                                                                                                                                                                                                                                                                                                                                                                                                                                                                                                                                                                           |
|                                 |                                                                                                                                                                                                                                                                                                                                                                                                                                                                                                                                                                                                                                                                                                                                                                                 |

SCHOLARONE™  
Manuscripts



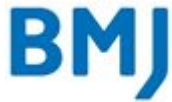

I, the Submitting Author has the right to grant and does grant on behalf of all authors of the Work (as defined in the below author licence), an exclusive licence and/or a non-exclusive licence for contributions from authors who are: i) UK Crown employees; ii) where BMJ has agreed a CC-BY licence shall apply, and/or iii) in accordance with the terms applicable for US Federal Government officers or employees acting as part of their official duties; on a worldwide, perpetual, irrevocable, royalty-free basis to BMJ Publishing Group Ltd ("BMJ") its licensees and where the relevant Journal is co-owned by BMJ to the co-owners of the Journal, to publish the Work in this journal and any other BMJ products and to exploit all rights, as set out in our [licence](#).

The Submitting Author accepts and understands that any supply made under these terms is made by BMJ to the Submitting Author unless you are acting as an employee on behalf of your employer or a postgraduate student of an affiliated institution which is paying any applicable article publishing charge ("APC") for Open Access articles. Where the Submitting Author wishes to make the Work available on an Open Access basis (and intends to pay the relevant APC), the terms of reuse of such Open Access shall be governed by a Creative Commons licence – details of these licences and which [Creative Commons](#) licence will apply to this Work are set out in our licence referred to above.

Other than as permitted in any relevant BMJ Author's Self Archiving Policies, I confirm this Work has not been accepted for publication elsewhere, is not being considered for publication elsewhere and does not duplicate material already published. I confirm all authors consent to publication of this Work and authorise the granting of this licence.

# Gestational weight gain and adverse pregnancy outcomes: a prospective cohort study

Yuelin Wu, MA<sup>1#</sup>, Sheng Wan, MD<sup>1#</sup>, Shengyi Gu, MA<sup>2</sup>, Zhengqian Mou, MA<sup>2</sup>, Lingling Dong, MA<sup>1</sup>, Zhongcheng Lou, PhD<sup>3</sup>, Jun Zhang, PhD<sup>2\*</sup>, Xiaolin Hua, MD<sup>1\*</sup>

1. Department of Obstetrics, Shanghai First Maternity and Infant Hospital, Shanghai Tongji University School of Medicine, Shanghai, China
2. Department of Obstetrics and Gynecology, Xinhua Hospital, Shanghai Jiao Tong University School of Medicine, Shanghai, China
3. Lunenfeld-Tanenbaum Research Institute, Obstetrics and Gynecology, Mount Sinai Hospital, Department of Obstetrics and Gynecology, University of Toronto, Toronto, Canada

**#These authors contributed equally to this work.**

**\*Correspondence:**

**Xiaolin Hua, MD**

Department of Obstetrics, Shanghai First Maternity and infant hospital, Shanghai Tongji University School of Medicine, Shanghai, China

2699 West Gaoke Road, Shanghai, China 201204

Tel: 021-20261000

1  
2  
3  
4 Fax: 021-20261000  
5

6  
7 Email: xiaolin\_hua@tongji.edu.cn  
8  
9

10  
11  
12 **Jun Zhang, PhD**  
13

14 Department of Obstetrics and Gynecology, Xinhua Hospital, Shanghai Jiao Tong University  
15

16  
17 School of Medicine  
18

19  
20 1665 Kongjiang Road, Shanghai, China 200092  
21

22  
23 Tel: 021-25078999  
24

25  
26 Fax: 021-25078293  
27

28  
29 Email: zhangjun@xinhumed.com.cn  
30  
31  
32  
33  
34  
35  
36  
37  
38  
39  
40  
41  
42  
43  
44  
45  
46  
47  
48  
49  
50  
51  
52  
53  
54  
55  
56  
57  
58  
59  
60

## Abstract

**Objective** To assess the associations of gestational weight gain (GWG) in early and late pregnancy with subsequent risks of adverse pregnancy outcomes in Chinese women.

**Design** Prospective cohort study.

**Setting** Shanghai, China.

**Participants** We studied 2630 nulliparous singleton pregnant women with complete data on weight gain in early ( $\leq 17$  weeks of gestation) and late ( $> 17$  weeks) pregnancy in the Shanghai Birth Cohort.

**Methods** GWG was standardized into z-scores by gestational age and categorized as low (z score  $< -1$ ), normal ( $-1$  to  $1$ ), and high ( $> 1$ ). The adjusted relative risks (aRRs) and 95% confidence intervals (CIs) were estimated through log-binomial regression models. Interaction effects between GWG and some other adjustment factors were tested, further stratified analyses were performed separately where interaction terms were significant.

1  
2  
3  
4 **Outcome measures** Adverse maternal and neonatal outcomes.  
5  
6  
7

8 **Results** Independent from GWG in late pregnancy, higher GWG in early pregnancy  
9  
10 was associated with higher risks of gestational diabetes mellitus (aRR: 1.66; 95% CI:  
11  
12 1.11–2.48), caesarean section (aRR: 1.21; 95% CI: 1.05–1.39), and prolonged  
13  
14 hospitalization (aRR: 1.56; 95% CI: 1.03–2.38). Higher GWG in late pregnancy was  
15  
16 independently associated with higher risks of caesarean section (aRR: 1.24; 95% CI:  
17  
18 1.09–1.41), large for gestational age (aRR: 2.01; 95% CI: 1.50–2.7), and macrosomia  
19  
20 (aRR: 1.90; 95% CI: 1.30–2.78). In addition, the risk of gestational hypertension  
21  
22 increased significantly with increased total GWG (aRR: 1.78; 95% CI: 1.14–2.76). The  
23  
24 effects of GWG in late pregnancy on maternal and neonatal outcomes were  
25  
26 significantly different between the women bearing a female and the women bearing  
27  
28 male fetus.  
29  
30  
31  
32  
33  
34  
35  
36  
37  
38  
39  
40  
41  
42  
43  
44  
45  
46  
47

48 **Conclusion** GWG is associated with a series of adverse pregnancy outcomes including  
49  
50 gestational diabetes mellitus, gestational hypertension, large for gestational age, etc..  
51  
52  
53  
54 And the GWG associations with the pregnancy outcomes can be modified by the timing  
55  
56  
57  
58 of GWG and the infant sex.  
59  
60

1  
2  
3  
4 **Keywords** gestational weight gain, pregnancy outcomes, z-scores, fetal sex  
5  
6  
7  
8  
9  
10  
11  
12  
13  
14  
15  
16  
17  
18  
19  
20  
21  
22  
23  
24  
25  
26  
27  
28  
29  
30  
31  
32  
33  
34  
35  
36  
37  
38  
39  
40  
41  
42  
43  
44  
45  
46  
47  
48  
49  
50  
51  
52  
53  
54  
55  
56  
57  
58  
59  
60

For peer review only

## Strengths and limitations of this study

1. Weight gain data collected before and during pregnancy enabled us to investigate the effect of timing of weight gain on the outcomes.
2. The use of z-scores instead of original weight gain value to account for the gestational-age-dependent nature of GWG allowed us to differentiate the effect caused by weight gain from the effect caused by duration of pregnancy.
3. Effect modification by fetal sex was investigated.
4. Only short-term rather than long-term pregnancy outcomes were investigated.
5. Pre-pregnancy weight was self-reported rather than measured.

## Introduction

Gestational weight gain (GWG) has been associated with pregnancy outcomes.

Insufficient weight gain has been linked with increased risks of low birth weight, small

for gestational age (SGA) and preterm birth, while excessive weight gain has been

associated with large for gestational age (LGA), gestational diabetes mellitus (GDM),

preeclampsia, preterm birth, caesarean section, infant mortality and childhood obesity<sup>[1-</sup>

<sup>2]</sup>. However, although women are routinely weighed in clinical settings and receive

gestational weight gain advice<sup>[3-4]</sup>, a high proportion of pregnant women who gained

above or below GWG weight ranges recommended by the guidelines<sup>[5]</sup>. Based on data

collected from 23 studies involving more than 1.3 million women, GWG was below or

above the weight gain range suggested by Institute of Medicine (IOM) guidelines in 23%

and 47% of pregnancies, respectively<sup>[1]</sup>, and the prevalence of excess gestational weight

gain appears to be on the rise<sup>[6]</sup>.

It is well established that total GWG affects pregnancy outcomes<sup>[7]</sup>. Some studies

suggest that GWG during early pregnancy may be more important than GWG at late

pregnancy for developing certain pregnancy outcomes such as GDM and adverse



1  
2  
3  
4 cardio-metabolic profile in the offspring<sup>[8-11]</sup>. Overall, studies examining associations  
5  
6  
7  
8 of early GWG with perinatal outcomes have been relatively few, and these studies have  
9  
10  
11 often not accounted for the effects of weight gain during other periods of pregnancy<sup>[12]</sup>.

12  
13  
14 In the prospective pregnancy cohort study, we conducted a sought to explore in a  
15  
16  
17 Chinese population-based study to establish the relationship of GWG during early and  
18  
19  
20  
21  
22 late pregnancy with maternal and neonatal outcomes.  
23  
24  
25

## 26 **Materials and Methods**

### 27 28 29 *Study design and data source*

30  
31  
32  
33  
34 This prospective cohort study is based on the recently developed Shanghai Birth Cohort  
35  
36  
37 (SBC) which has been described in details elsewhere<sup>[13]</sup>. Briefly, the SBC is a  
38  
39  
40  
41  
42 prospective observational study conducted in Shanghai, China, aiming to examine  
43  
44  
45 factors affecting fecundability, pregnancy outcomes, child growth and development,  
46  
47  
48 and risks of diseases. The cohort recruited 4127 women in pre-conception care (701)  
49  
50  
51 or early antenatal care (3426). The data was collected between September 1, 2013 and  
52  
53  
54  
55 November 31, 2016, resulting in 3699 live births. The collected data included maternal  
56  
57  
58  
59 demographical characteristics, health behaviors, reproductive history, as well as  
60

1  
2  
3  
4 clinical information related to pregnancy, birth and pregnancy outcomes. This study  
5  
6  
7  
8 was approved by Xinhua Hospital Research Ethics Committee, Shanghai Jiao Tong  
9  
10  
11 University School of Medicine (reference number: XHEC-F-NSFC-2018-122).  
12  
13  
14

### 15 ***Study population***

16  
17  
18  
19 The present study collected the data from all singleton pregnancies in women with age  
20  
21  
22  
23  $\geq 20$  years old who started antenatal care before 17 weeks' gestation and delivered at  
24  
25  
26  
27  $\geq 28$  weeks of gestation with data available on weight gains in early and late gestation  
28  
29  
30 in the SBC cohort.  
31  
32

33  
34 Gestational age was estimated based on the date of last menstruation period and  
35  
36  
37 confirmed by first trimester ultrasound date. The eligible data collected in this study  
38  
39  
40 were obtained from : (1) self-reported pre-pregnancy weight (kg); (2) weight and height  
41  
42  
43 (cm) measured in early pregnancy (17 weeks of gestation or less); and (3) weight  
44  
45  
46  
47 measured within the last week of pregnancy. Subjects were excluded if: (1) weight in  
48  
49  
50  
51 early pregnancy  $< 30$  kg or  $> 350$  kg; or (2) z-score of gestational weight gain  $< -4.0$   
52  
53  
54 or  $> 4.0$ , the methods used in the study were similar to the study conducted by Johansson  
55  
56  
57  
58 et al<sup>[14]</sup>. Women with pre-existing medical conditions such as pre-gestational diabetes,  
59  
60

1  
2  
3  
4 hypo- or hyper-thyroidism (affecting GWG)<sup>[15]</sup> and heart/liver/kidney diseases were  
5  
6  
7  
8 also excluded.  
9

### 10 11 ***Weight measurements***

12  
13  
14  
15  
16 Pre-pregnancy weight (kg) was based on self-reporting, while weight at early  
17  
18  
19 pregnancy and at delivery was routinely measured to the nearest 0.1 kg using the  
20  
21  
22  
23 available electronic weighing device in the prenatal care clinics. Height (cm) at the first  
24  
25  
26 prenatal visit was routinely measured to the nearest 0.1 cm using the available  
27  
28  
29  
30 electronic stadiometer in the hospital. Pre-pregnancy body mass index (BMI; kg/m<sup>2</sup>)  
31  
32  
33 was calculated as pre-pregnancy weight (kg) divided by height (m)<sup>2</sup> and categorized as  
34  
35  
36  
37  
38  
39  
40  
41  
42  
43  
44  
45  
46  
47  
48  
49  
50  
51  
52  
53  
54  
55  
56  
57  
58  
59  
60  
underweight (<18.5 kg/m<sup>2</sup>), normal weight (18.5-24.9 kg/m<sup>2</sup>), overweight (25.0-29.9  
kg/m<sup>2</sup>), and obese ( $\geq 30.0$  kg/m<sup>2</sup>)<sup>[16]</sup>.

Early pregnancy in this study was defined as gestational age  $\leq 17$  weeks so as to include  
virtually all women who started the first antenatal care in the hospital<sup>[17]</sup>. The 2009  
Institute of Medicine (IOM) recommendations suggested that women should gain 0.5-  
2 kg in early pregnancy<sup>[5]</sup> and the 50<sup>th</sup> centile GWG for women at gestational age  $\leq 17$   
weeks was below 2 kg according to the INTERGROWTH-21<sup>st</sup> Project<sup>[2]</sup>. We examined

1  
2  
3  
4 GWG in early pregnancy (weight measured  $\leq 17$  weeks minus pre-pregnancy weight)  
5  
6  
7  
8 and late pregnancy (last measurement of weight prior to delivery minus weight  
9  
10  
11 measured  $\leq 17$  weeks). Total GWG was calculated as last measurement of weight before  
12  
13  
14 delivery minus pre-pregnancy weight. All GWG values were standardized into z-scores  
15  
16  
17 by gestational age, stratified by BMI categories. The means and standard deviations  
18  
19 (SD) of GWGs in early pregnancy and late pregnancy were used to convert the GWG  
20  
21  
22 values into z-scores. All GWG z-scores were first examined as continuous variables,  
23  
24  
25 and then categorized as  $< -1.0$  (below),  $-1.0$  to  $+1.0$  (average) and  $> +1.0$  (above) in data  
26  
27  
28  
29 analyses. The analyses for GWG in early pregnancy were restricted to women whose  
30  
31  
32  
33 GWGs in late pregnancy were average ( $-1.0$  to  $+1.0$ ). Similarly, the analyses for late  
34  
35  
36 pregnancy weight gain were restricted to women with weight gain value in early  
37  
38  
39  
40 pregnancy within  $-1.0$  to  $+1.0$ .  
41  
42  
43  
44  
45  
46

### 47 ***Covariates***

48  
49  
50  
51 Co-variables included fetal sex, maternal age (20 to 34,  $\geq 35$  years), parity (0,  $\geq 1$ ), pre-  
52  
53  
54 pregnancy body mass index (BMI) categories (underweight, normal, overweight/obese),  
55  
56  
57 alcohol/tobacco use (yes or no), GDM (yes or no), gestational hypertension (yes or no)  
58  
59  
60

1  
2  
3  
4 and length of gestation (28 to 36,  $\geq 37$  weeks)  
5  
6  
7

### 8 ***Outcomes***

9

10  
11  
12 The outcomes included gestational diabetes mellitus (GDM), gestational hypertension,  
13  
14  
15  
16 caesarean section, preterm birth, neonatal intensive care unit (NICU) admission,  
17  
18  
19 neonatal prolonged hospitalization ( $\geq 5$  days), severe neonatal outcomes, neonatal  
20  
21  
22  
23 hyperbilirubinemia ( $\leq 12$  mg/dL), LGA, SGA, macrosomia ( $> 4000$  g) and low  
24  
25  
26  
27 birthweight ( $< 2500$  g).  
28

29  
30 All women received a 75 g oral glucose tolerance test (OGTT) during 24-28 weeks of  
31  
32  
33 gestation. GDM was diagnosed according to the IADPSG criteria: if anyone had the  
34  
35  
36  
37 glucose values fell at or above the following thresholds: fasting 5.1 mmol/L, 1 hour  
38  
39  
40 10.0 mmol/L, 2 hour 8.5 mmol/L. Gestational hypertension was defined as de novo  
41  
42  
43  
44 hypertension (systolic blood pressure  $\geq 140$  mmHg or diastolic blood pressure  $\geq 90$   
45  
46  
47 mmHg) after 20 weeks' gestation. Preterm birth was defined as gestational age at  
48  
49  
50  
51 delivery  $< 37$  weeks. SGA was defined as birth weight  $\leq 10^{\text{th}}$  percentile, and LGA as  
52  
53  
54  
55 birth weight  $\geq 90^{\text{th}}$  percentile according to Chinese sex- and gestational age-specific  
56  
57  
58  
59 birth weight standards<sup>[18]</sup>. Severe neonatal outcomes included death, 5 minute APGAR  
60

1  
2  
3  
4 score <7, hypoglycemia (<40 mg/dL), sepsis, cardiopulmonary resuscitation or  
5  
6  
7  
8 ventilator support within 24 hours after birth, severe respiratory disorders (respiratory  
9  
10  
11 distress syndrome or transient tachypnea of the newborn), serious birth defects, seizures,  
12  
13  
14  
15 necrotizing enterocolitis, and hypoxic-ischemic encephalopathy.  
16

### 17 18 19 *Statistical analyses*

20  
21  
22  
23 Maternal demographic characteristics and clinical factors were compared across GWG  
24  
25  
26 groups. Continuous variables were described by mean  $\pm$  standard deviation (SD) or  
27  
28  
29 median (interquartile range, IQR). Categorical variables were described by frequencies  
30  
31  
32  
33 (%). Analysis of variance or Kruskal-Wallis H tests were performed for continuous data,  
34  
35  
36  
37 and chi-square tests or Fisher's exact tests were performed for categorical data.  
38

39  
40  
41 The incidences of adverse pregnancy outcomes were examined among three GWG  
42  
43  
44 groups. Multivariate log-binomial regression models were used to estimate the  
45  
46  
47 unadjusted relative risks (RRs), adjusted relative risks (ARRs) and 95% confidence  
48  
49  
50 intervals (CIs) of adverse pregnancy outcomes across GWG groups. Regression model  
51  
52  
53  
54 for maternal outcomes were adjusted for only co-variables with  $p < 0.2$  (maternal age,  
55  
56  
57  
58 parity, pre-pregnancy BMI, alcohol/tobacco use, fetal sex and length of gestation).  
59  
60

1  
2  
3  
4 Neonatal outcomes models were further adjusted for GDM and PIH in addition to the  
5  
6  
7  
8 aforementioned factors. Effects between weight gain and fetal sex and other covariates  
9  
10  
11 on adverse neonatal outcomes were also investigated. Interaction effects between GWG  
12  
13  
14 and fetal sex and other covariates (parity, maternal pre-pregnancy BMI, maternal age)  
15  
16  
17 on adverse maternal and neonatal outcomes were also tested.  
18  
19

20  
21  
22 All analyses were performed using the Statistical Analysis System (SAS) for Windows,  
23  
24  
25 version 9.4 (SAS Institute, Cary, NC).  $P < 0.05$  was considered statistically significant.  
26  
27

### 28 29 *Patient and public involvement*

30  
31  
32  
33 No patients were involved in the design, or conduct, or reporting, or dissemination plans  
34  
35  
36  
37 of our research.  
38  
39

## 40 41 **Results**

### 42 43 44 45 *Study population and characteristics*

46  
47  
48  
49 A total of 2630 pregnant women met the study inclusion criteria (Figure 1). The  
50  
51  
52 characteristics of all pregnant women in the study by total GWG is shown in Table 1.  
53  
54  
55  
56 Among them, 1605 women who gained average weight in late pregnancy (z-score -1 to  
57  
58  
59 +1) were analyzed for the association of GWG in early pregnancy with the outcomes  
60

(Table S1); while 1717 women who gained average weight in early pregnancy were analyzed for the association of GWG in late pregnancy with the outcomes (Table S2).

It should be noticed that for the two analytic datasets, the reference group was the same group of women who had average GWG in both early and late pregnancy (n=1233).

### ***Weight gain during early pregnancy***

The risks of maternal and neonatal outcomes for GWG in early pregnancy are presented in Figure 2A and Table S3. Lower GWG was not significantly associated with pregnancy outcomes, compared with that of the average GWG. In contrast, the risks of GDM (aRR=1.66; 95% CI: 1.11-2.48), caesarean section (aRR=1.21; 95% CI: 1.05-1.39) and prolonged hospitalization (aRR=1.56; 95% CI: 1.03-2.38) were higher in the group with GWG above average in early pregnancy. No significant interactions between GWG in early pregnancy and covariates were observed.

### ***Weight gain during late pregnancy***

Associations of GWG in late pregnancy with perinatal outcomes are presented in Figure 2B and Table S4. In contrast to early pregnancy, the risks for GDM and SGA decreased significantly with increased GWG in late pregnancy, whereas the risks for LGA and



1  
2  
3  
4 macrosomia increased. Weight gain above average was correlated with a higher risk for  
5  
6  
7  
8 caesarean section (aRR=1.24; 95% CI: 1.09-1.41) in late pregnancy. In addition, higher  
9  
10  
11 GWG showed a protective effect against neonatal hyperbilirubinemia (aRR=0.64; 95%  
12  
13  
14  
15 CI: 0.43-0.94).

16  
17  
18 Significant interactions were identified between GWG in late pregnancy and fetal sex.  
19  
20  
21  
22 Figure 3 and Table S5 shows the associations of late pregnancy weight gain with  
23  
24  
25 pregnancy outcomes stratified by fetal sex. The risks for LGA and caesarean section  
26  
27  
28 significantly increased in women with higher GWG in late pregnancy, but the odds of  
29  
30  
31  
32  
33 GDM increased with less GWG, regardless of fetal sex. However, higher risks of  
34  
35  
36 gestational hypertension (aRR=2.31; 95% CI: 1.08-4.95) was only observed in women  
37  
38  
39 bearing a female fetus with higher GWG. Conversely, higher GWG in late pregnancy  
40  
41  
42 was associated with GDM (aRR=0.30; 95% CI: 0.10-0.96), neonatal  
43  
44  
45 hyperbilirubinemia (aRR=0.46; 95% CI: 0.24-0.89) and macrosomia (aRR=2.05; 95%  
46  
47  
48 CI: 1.27-3.31) for women bearing a boy, but not for women bearing a girl, indicating  
49  
50  
51  
52  
53 effect modifications by fetal sex. But when stratified by fetal sex, the lower risk of SGA  
54  
55  
56  
57 with higher GWG was no longer observed.  
58  
59  
60

### ***Total weight gain during pregnancy***

Figure 2C and Table S6 show results for pregnancy outcomes by total GWG. The effect sizes of GWG in late pregnancy on pregnancy outcomes were almost identical with the effect sizes of total GWG. Similar to late pregnancy, the risks for LGA, macrosomia and gestational hypertension increased significantly with increased total GWG. Higher GWG was also linked with a higher risk for caesarean section (aRR=1.78; 95% CI: 1.14-2.76). Moreover, total GWG below the average was associated with higher risks of GDM (aRR=1.51; 95% CI: 1.15-1.98) and SGA (aRR=1.53; 95% CI: 1.01-2.32). No significant interactions between total GWG and other covariates were identified.

## **Discussion**

### **Main Findings**

In this study, we found that the associations of gestational stage-specific weight gain with maternal and neonatal outcomes were different. Of those, independent of GWG in late pregnancy, higher GWG in early was associated with higher risks of GDM, caesarean section, and neonatal prolonged hospitalization.

### **Strengths and limitations**

1  
2  
3  
4 There are strengths in our study. In the study, some improvements have been made  
5  
6  
7  
8 when compared with other studies reported in the literatures. First, the SBC database  
9  
10  
11 contains detailed clinical data including pre-pregnancy weight, weight measurements  
12  
13  
14 during pregnancy and pregnancy weight measurements before delivery. This made it  
15  
16  
17 possible to study GWG in both early and late pregnancy. In addition, the use of GWG  
18  
19  
20 z-scores in our study instead of using original weight gain to take into  
21  
22  
23 consideration( account for the gestational-age-dependent nature of GWG allowed us to  
24  
25  
26 differentiate the effects of GWG from the effects of gestational duration (a shorter  
27  
28  
29 pregnancy duration should be correlated to less weight gain)<sup>[14, 19]</sup>.  
30  
31  
32  
33  
34  
35

36 There are also limitations in our study. We only investigated the short-term perinatal  
37  
38  
39 outcomes. Recently, researchers have linked an individual's susceptibility to chronic  
40  
41  
42 disease such as cardio-metabolic disease and obesity in later life to events during the  
43  
44  
45 intrauterine phase of development<sup>[8, 20-21]</sup>. Further studies on long-term outcomes would  
46  
47  
48 provide important evidence regarding the associations between chronic diseases and  
49  
50  
51 events during the intrauterine phase.  
52  
53  
54  
55  
56

## 57 **Interpretation**

58  
59  
60

1  
2  
3  
4 Associations between insufficient or excessive weight gain during the whole pregnancy  
5  
6  
7  
8 and maternal and child health outcomes have been well described<sup>[1-2, 7]</sup>. A meta-analysis  
9  
10  
11 of pooled 1309136 participant data from 23 cohort studies showed that women who  
12  
13  
14 gained high weight were more likely to have LAG, caesarean section and macrosomia,  
15  
16  
17 while women who gained less weight were at higher risk of SGA<sup>[1]</sup>. These findings are  
18  
19  
20  
21  
22 in line with the association of maternal weight gain with adverse pregnancy outcomes  
23  
24  
25  
26 in our study.

27  
28  
29 There is growing recognition that the impacts of gestational stage-specific weight gain  
30  
31  
32 on pregnancy outcomes may vary<sup>[8-9, 20, 22-23]</sup>. GWG in early pregnancy largely reflects  
33  
34  
35 maternal fat deposition, whereas GWG thereafter is mainly attributed to maternal and  
36  
37  
38 amniotic fluid expansion, and growth of the fetus, placenta and uterus<sup>[5]</sup>. In this study,  
39  
40  
41  
42  
43 mothers with increased fat deposition during pregnancy may affect the adiposity of the  
44  
45  
46 offspring by higher placental transfer of nutrients, such as glucose and free fatty acids,  
47  
48  
49  
50 which may lead to maternal pregnancy complications, such as GDM, and permanent  
51  
52  
53 fetal and childhood adaptations in appetite, energy metabolism and neuro-endocrine  
54  
55  
56  
57 function <sup>[23-24]</sup>. Therefore, GWG in early pregnancy, prior to the development of  
58  
59  
60

1  
2  
3  
4 pregnancy outcomes, might be as or more important than GWG in late pregnancy with  
5  
6  
7  
8 respect to pregnancy outcomes<sup>[9, 14]</sup>. A study of 5908 Netherlands mother-offspring  
9  
10  
11 pairs reported that higher weight gain in early pregnancy was associated with an  
12  
13  
14 adverse cardio-metabolic profile in the offspring<sup>[8]</sup>. Similarly, a study of 5154 UK  
15  
16  
17 mother-offspring pairs showed that GWG in the first 14 weeks tended to be  
18  
19  
20 incrementally associated with offspring BMI, waist circumference and fat mass in  
21  
22  
23 children at age 9 years, but after 14 weeks of gestation, only high levels of GWG were  
24  
25  
26 associated with offspring's adiposity measures, highlighting the importance of the  
27  
28  
29 timing of weight gain in pregnancy<sup>[22]</sup>.  
30  
31  
32  
33  
34  
35

36 Studies to clarify the relationship between gestational stage-specific weight gain and  
37  
38  
39 adverse pregnancy outcomes have been sporadic. A study of Korean pregnant women  
40  
41  
42 found that GWG velocity at early pregnancy was significantly associated with GDM,  
43  
44  
45 gestational hypertension, cesarean section, LGA, and macrosomia<sup>[12]</sup>. However, the  
46  
47  
48 analyses have not accounted for the effects of weight gain in other periods of pregnancy.  
49  
50  
51  
52  
53 In contrast, our analyses for early/late pregnancy GWG were restricted to women  
54  
55  
56 whose GWG z-scores in other pregnancy stage were normal, and thus the observed  
57  
58  
59  
60

1  
2  
3  
4 associations are independent of GWG in different periods. Our data from a large  
5  
6  
7  
8 population-based Chinese cohort in Shanghai showed that higher, but not lower,  
9  
10  
11 maternal GWG in early pregnancy was associated with increased risks of adverse  
12  
13  
14 pregnancy outcomes, including GDM, caesarean section and prolonged hospitalization.

15  
16  
17  
18 In late pregnancy, low weight gain was associated with GDM as well as SGA, and high  
19  
20  
21 weight gain was associated with caesarean section, LGA and macrosomia.

22  
23  
24  
25 High GWG in early pregnancy has been associated with an increased risk of GDM,  
26  
27  
28 while there are some inconsistent data concerning the associations of GWG in second  
29  
30  
31 and third trimester or the whole pregnancy with GDM<sup>[11, 25-27]</sup>. Our study presents the  
32  
33  
34 results which are in consistent with results produced by other studies <sup>[12, 25, 28]</sup> indicating  
35  
36  
37 that higher GWG in early pregnancy may increase the risk of developing GDM, but  
38  
39  
40 higher GWG in late pregnancy shows a reversed association. The discrepancy might be  
41  
42  
43 due to that women diagnosed with GDM might have undergone weight control  
44  
45  
46 interventions such as prescribed diet and physical exercise after the GDM diagnosis.  
47  
48  
49  
50 Avoiding high weight gain in early pregnancy may prevent GDM, and doctors might  
51  
52  
53  
54  
55  
56  
57 consider preemptive actions in high-risk pregnant women.  
58  
59  
60

1  
2  
3  
4 The risk of gestational hypertension increases significantly with higher maternal total  
5  
6  
7  
8 GWG. A study of 29861 women from 25 hospitals in America showed that early weight  
9  
10  
11 gain over the 2009 IOM recommendation were shown to be associated with the  
12  
13  
14 development of gestational hypertension<sup>[29]</sup>. In a study of 101259 women with chronic  
15  
16  
17 hypertension, women who gained the amount of weight above the GWG range  
18  
19 recommended by IOM guidelines were at increased risks of eclampsia<sup>[30]</sup>. Given the  
20  
21  
22 known vascular permeability and decreased plasma oncotic pressure that accompanies  
23  
24  
25 preeclampsia and its association with rapid weight gain<sup>[31]</sup>, excessive GWG may be a  
26  
27  
28 cause of hypertensive disease of pregnancy.  
29  
30  
31  
32  
33  
34  
35

36 Total GWG of average (-1 to +1) in our study were  $15.2 \pm 2.3$  kg for women with pre-  
37  
38  
39 pregnancy BMI less than 18.5 (underweight) and  $15.0 \pm 2.5$  kg for those who with pre-  
40  
41  
42 pregnancy BMI of 18.5 to 24.9 (normal weight), which corresponded to the 2009 IOM  
43  
44  
45 recommendations. Specifically, the 2009 IOM recommendations suggested GWG of  
46  
47  
48  
49  
50  
51  
52  
53  
54  
55  
56  
57  
58  
59  
60  
12.5 to 18 kg for underweight women and 11.5 to 16 kg for normal weight women<sup>[5]</sup>.

However, due to the sporadic number of obese women, we analyzed them together with  
overweight women. Total GWG of average were  $12.3 \pm 3.7$  kg for women with pre-

1  
2  
3  
4 pregnancy BMI greater than 25.0 (overweight and obese) in our study, which in general  
5  
6  
7  
8 was higher than the 2009 IOM recommended GWG range with 7 to 11.5 kg for  
9  
10  
11 overweight and 5 to 9 kg for obese<sup>[5]</sup>. The most important reason for this difference is  
12  
13  
14 that the IOM recommendation was derived largely from data collected among white  
15  
16  
17 women and may not well represent Chinese Population<sup>[32]</sup>. Therefore, we plan to  
18  
19  
20 establish GWG standards that can be applied to Chinese population.  
21  
22  
23

24  
25 Our data suggest effect modification by fetal sex in the association of GWG in late  
26  
27  
28 pregnancy with birth outcomes. Recent studies suggest that fetus sex may affect  
29  
30  
31 pregnancy outcomes<sup>[33-34]</sup>. Although not very clear, how fetal sex may influence these  
32  
33  
34 outcomes may be explained by several factors. The placenta is an active endocrine  
35  
36  
37 organ, a sex-specific maternal-placental-fetal interaction may be involved<sup>[22]</sup>. Animal  
38  
39  
40 studies suggest that maternal baseline BMI and GWG are associated with the hormonal  
41  
42  
43 milieu, including insulin resistance<sup>[35]</sup>. In agreement with this concept, a growing body  
44  
45  
46 of evidence linking early pregnancy GWG with cord blood hormones that may affect  
47  
48  
49 fetal growth and development<sup>[36]</sup>. Previous studies reported fetal sex differences in  
50  
51  
52 maternal first trimester hormones concentrations<sup>[15, 33, 37]</sup>. The resultant intrauterine  
53  
54  
55  
56  
57  
58  
59  
60



1  
2  
3  
4 environment may affect fetal development.  
5  
6  
7

8 Our findings may have clinical implications. First, from early pregnancy onwards,  
9  
10  
11 GWG may affect subsequent maternal and neonatal outcomes. Second, although  
12  
13  
14 interventions to limit GWG in late pregnancy are effective, the benefits might be  
15  
16  
17 modest at best. To mitigate the harms of excessive weight gain, addressing the  
18  
19  
20 importance of gaining the appropriate amount of weight in both early and late  
21  
22  
23 pregnancy should be integrated into routine prenatal care<sup>[1, 7, 38]</sup>.  
24  
25  
26  
27  
28

## 29 **Conclusion**

30  
31  
32  
33 The GWG associations with adverse pregnancy outcomes differ at early and late  
34  
35  
36 pregnancy, and there may be effect modification by fetal sex in the association of GWG  
37  
38  
39 in late pregnancy with some pregnancy outcomes. Weight gain management should be  
40  
41  
42 integrated into the routine prenatal care to decrease the risks of adverse pregnancy  
43  
44  
45 outcomes.  
46  
47  
48  
49

50  
51 **Acknowledgement** We thank the study participants for permitting us to use their  
52  
53  
54 personal data.  
55  
56

57  
58 **Contributors** YW and SW participated in interpretation of data and involved in  
59  
60

1  
2  
3  
4 drafting the manuscript. SG, ZM and LD analyzed the data and critically revised the  
5  
6  
7  
8 manuscript. ZL, JZ and XH made substantial contributions to conception and design,  
9  
10  
11 interpreted the data, and critically revised the manuscript. All authors read and  
12  
13  
14  
15 approved the final manuscript.  
16  
17

18 **Funding** This research was supported by a research grant (81873816) from the  
19  
20  
21  
22 National Natural Science Foundation of China.  
23  
24

25 **Competing interests** None declared. Completed disclosure of interests form  
26  
27  
28  
29 available to view online as supporting information.  
30  
31

32 **Patient consent for publication** Not required.  
33  
34

35  
36 **Ethics approval** This study was approved by Xinhua Hospital Research Ethics  
37  
38  
39 Committee, Shanghai Jiao Tong University School of Medicine (reference number:  
40  
41  
42  
43 XHEC-F-NSFC-2018-122).  
44  
45

46 **Provenance and peer review** Not commissioned; externally peer reviewed.  
47  
48  
49

50 **Open access** This is an open access article distributed in accordance with the  
51  
52  
53  
54 Creative Commons Attribution Non Commercial (CC BY-NC 4.0) license, which  
55  
56  
57  
58 permits others to distribute, remix, adapt, build upon this work non-commercially, and  
59  
60

1  
2  
3  
4 license their derivative works on different terms, provided the original work is properly  
5  
6  
7  
8 cited, appropriate credit is given, any changes made indicated, and the use is non-  
9  
10  
11 commercial. See: <http://creativecommons.org/licenses/by-nc/4.0/>.

12  
13  
14  
15 **Data sharing statement** The data will be available upon request to the corresponding  
16  
17  
18 authors.

## 21 22 **ORCID iD**

23  
24  
25 X Hua <https://orcid.org/0000-0003-1098-5010>

## 29 30 31 **References**

- 32  
33  
34 1. Goldstein R.F., Abell S.K., Ranasinha S., Misso M., Boyle J.A., Black M.H., et al.  
35 Association of Gestational Weight Gain With Maternal and Infant Outcomes: A Systematic  
36 Review and Meta-analysis. *Jama* 2017; 317: 2207.
- 37  
38 2. Ismail L.C., Bishop D.C., Pang R., Ohuma E.O., Kac G., Abrams B., et al. Gestational  
39 weight gain standards based on women enrolled in the Fetal Growth Longitudinal Study of the  
40 INTERGROWTH-21st Project: a prospective longitudinal cohort study. *Bmj British Medical*  
41 *Journal* 2016; 352: i555.
- 42  
43 3. Shulman R., Kottke M. Impact of maternal knowledge of recommended weight gain in  
44 pregnancy on gestational weight gain. *American Journal of Obstetrics & Gynecology* 2016;  
45 214: 754.e751-754.e757.
- 46  
47 4. Krukowski R.A., West D.S., Dicarlo M., Cleves M.A., Saylor M.E., Andres A.  
48 Association of Gestational Weight Gain Expectations and Advice on Actual Weight Gain.  
49 *Obstetrics & Gynecology* 2016; 129: 76.
- 50  
51 5. Institute of Medicine (US), National Research Council (US) Committee to Reexamine  
52 IOM Pregnancy Weight Guidelines. In: Rasmussen KM, Yaktine AL, editors. Weight Gain  
53  
54  
55  
56  
57  
58  
59  
60

- 1  
2  
3  
4 During Pregnancy. Washington (DC): National Academies Press. 2009.
- 5  
6 6. Flegal K.M., Kruszon-Moran D., Carroll M.D., Fryar C.D., Ogden C.L. Trends in Obesity  
7 Among Adults in the United States, 2005 to 2014. *JAMA* 2016; 315: 2284-2291.
- 8  
9 7. Caughey A.B. Gestational Weight Gain and Outcomes for Mothers and Infants. *JAMA*  
10 2017; 317: 2175-2176.
- 11  
12 8. Gaillard R., Steegers E.A., Franco O.H., Hofman A., Jaddoe V.W. Maternal weight gain in  
13 different periods of pregnancy and childhood cardio-metabolic outcomes. The Generation R  
14 Study. *Int J Obes (Lond)* 2015; 39: 677-685.
- 15  
16 9. Retnakaran R., Wen S.W., Tan H., Zhou S., Ye C., Shen M., et al. Association of Timing  
17 of Weight Gain in Pregnancy With Infant Birth Weight. *JAMA Pediatr* 2018; 172: 136-142.
- 18  
19 10. Sommer C., Morkrid K., Jenum A.K., Sletner L., Mosdol A., Birkeland K.I. Weight gain,  
20 total fat gain and regional fat gain during pregnancy and the association with gestational  
21 diabetes: a population-based cohort study. *Int J Obes (Lond)* 2014; 38: 76-81.
- 22  
23 11. Baci Y., Ustuner I., Keskin H.L., Ersoy R., Avsar A.F. Effect of maternal obesity and  
24 weight gain on gestational diabetes mellitus. *Gynecol Endocrinol* 2013; 29: 133-136.
- 25  
26 12. Cho E.H., Hur J., Lee K.J. Early Gestational Weight Gain Rate and Adverse Pregnancy  
27 Outcomes in Korean Women. *Plos One* 2015; 10: e0140376.
- 28  
29 13. Zhang J., Tian Y., Wang W., Ouyang F., Xu J., Yu X., et al. Cohort profile: the Shanghai  
30 Birth Cohort. *International Journal of Epidemiology* 2019; 48: 21-21g.
- 31  
32 14. Johansson K., Hutcheon J.A., Bodnar L.M., Cnattingius S., Stephansson O. Pregnancy  
33 weight gain by gestational age and stillbirth: a population-based cohort study. *Bjog* 2017; 125.
- 34  
35 15. Collares F.M., Korevaar T.I.M., Hofman A., Steegers E.A.P., Peeters R.P., Jaddoe V.W.V.,  
36 et al. Maternal thyroid function, prepregnancy obesity and gestational weight gain-The  
37 Generation R Study: A prospective cohort study. *Clin Endocrinol (Oxf)* 2017; 87: 799-806.
- 38  
39 16. Organization W.H. Obesity: preventing and managing the global epidemic. Report of a  
40 WHO consultation. 2000.
- 41  
42 17. Berggren E.K., Groh-Wargo S., Presley L., Mouzon H.D., Catalano P.M. Maternal fat, but  
43 not lean, mass is increased among overweight/obesewomen with excess gestational weight gain.  
44 *American Journal of Obstetrics & Gynecology* 2016; 214: 745.e741-745.e745.
- 45  
46 18. Zhu L., Zhang R., Zhang S., Shi W., Yan W., Wang X., et al. Chinese neonatal birth weight  
47 curve for different gestational age. *Chin J Pediatr* 2015; 53.
- 48  
49 19. Hutcheon J.A., Bodnar L.M., Joseph K.S., Abrams B., Simhan H.N., Platt R.W. The bias  
50 in current measures of gestational weight gain. *Paediatric and Perinatal Epidemiology* 2012;
- 51  
52  
53  
54  
55  
56  
57  
58  
59  
60

1  
2  
3  
4 26: 109-116.

5 20. Laitinen J., Jaaskelainen A., Hartikainen A.L., Sovio U., Vaarasmaki M., Pouta A., et al.  
6 Maternal weight gain during the first half of pregnancy and offspring obesity at 16 years: a  
7 prospective cohort study. *BJOG* 2012; 119: 716-723.  
8

9 21. Margerison-Zilko C.E., Shrimali B.P., Eskenazi B., Lahiff M., Lindquist A.R., Abrams B.F.  
10 Trimester of Maternal Gestational Weight Gain and Offspring Body Weight at Birth and Age  
11 Five. *Maternal & Child Health Journal* 2012; 16: 1215-1223.  
12

13 22. Fraser A., Tilling K., Macdonald-Wallis C., Sattar N., Brion M.-J., Benfield L., et al.  
14 Association of Maternal Weight Gain in Pregnancy With Offspring Obesity and Metabolic and  
15 Vascular Traits in Childhood. *Circulation* 2010; 121: 2557-2564.  
16

17 23. Lawlor D.A., Paul L., Abigail F., Niklas L.N.M. Does maternal weight gain in pregnancy  
18 have long-term effects on offspring adiposity? A sibling study in a prospective cohort of  
19 146,894 men from 136,050 families. *American Journal of Clinical Nutrition* 2011; 94: 142.  
20

21 24. Starling A.P., Brinton J.T., Glueck D.H., Shapiro A.L., Harrod C.S., Lynch A.M., et al.  
22 Associations of maternal BMI and gestational weight gain with neonatal adiposity in the  
23 Healthy Start study. *Am J Clin Nutr* 2015; 101: 302-309.  
24

25 25. MacDonald S.C., Bodnar L.M., Himes K.P., Hutcheon J.A. Patterns of Gestational Weight  
26 Gain in Early Pregnancy and Risk of Gestational Diabetes Mellitus. *Epidemiology* 2017; 28:  
27 419-427.  
28

29 26. Tomedi L.E., Simhan H.N., Chang C.C., McTigue K.M., Bodnar L.M. Gestational weight  
30 gain, early pregnancy maternal adiposity distribution, and maternal hyperglycemia. *Matern  
31 Child Health J* 2014; 18: 1265-1270.  
32

33 27. Dai Z.Y., Liu D., Li R., Wang Y., Zhang J., Liu J., et al. Association between gestational  
34 weight gain per trimester/total gestational weight gain and gestational diabetes mellitus.  
35 *Zhonghua Liu Xing Bing Xue Za Zhi* 2016; 37: 1336-1340.  
36

37 28. Moore Simas T.A., Waring M.E., Callaghan K., Leung K., Ward Harvey M., Buabbud A.,  
38 et al. Weight gain in early pregnancy and risk of gestational diabetes mellitus among Latinas.  
39 *Diabetes Metab* 2019; 45: 26-31.  
40

41 29. Kominiarek M.A., Saade G., Mele L., Bailit J., Reddy U.M., Wapner R.J., et al.  
42 Association Between Gestational Weight Gain and Perinatal Outcomes. *Obstet Gynecol* 2018;  
43 132: 875-881.  
44

45 30. Yee L.M., Caughey A.B., Cheng Y.W. Association between gestational weight gain and  
46 perinatal outcomes in women with chronic hypertension. *Am J Obstet Gynecol* 2017; 217: 348  
47  
48  
49  
50  
51  
52  
53  
54  
55  
56  
57  
58  
59  
60

1  
2  
3  
4 e341-348 e349.

5  
6 31. American College of Obstetricians and Gynecologists; Task Force on Hypertension in  
7 Pregnancy. Hypertension in pregnancy. Report of the American College of Obstetricians and  
8 Gynecologists' Task Force on Hypertension in Pregnancy. *Obstet Gynecol* 2013; 122:1122–  
9 31.

10  
11 32. Jiang X., Liu M., Song Y., Mou J., Zhou M., Ma Z., et al. The Institute of Medicine  
12 recommendation for gestational weight gain is probably not optimal among non-American  
13 pregnant women: a retrospective study from China. *The Journal of Maternal-Fetal &*  
14 *Neonatal Medicine* 2019, 32(8): 1353-1358.

15  
16 33. Broere-Brown Z.A., Schalekamp-Timmermans S., Hofman A., Jaddoe V.W.V., Steegers  
17 E.A.P. Fetal sex dependency of maternal vascular adaptation to pregnancy: a prospective  
18 population-based cohort study. *BJOG: An International Journal of Obstetrics & Gynaecology*  
19 2015; 123: 1087-1095.

20  
21 34. Torricelli M., Voltolini C., Conti N., Bocchi C., Severi F.M., Petraglia F. Weight gain  
22 regardless of pre-pregnancy BMI and influence of fetal gender in response to labor induction  
23 in postdate pregnancy. *J Matern Fetal Neonatal Med* 2013; 26: 1016-1019.

24  
25 35. Nicholas L.M., Rattanaray L., MacLaughlin S.M., Ozanne S.E., Kleemann D.O., Walker  
26 S.K., et al. Differential effects of maternal obesity and weight loss in the periconceptional  
27 period on the epigenetic regulation of hepatic insulin-signaling pathways in the offspring. *The*  
28 *FASEB Journal* 2013; 27: 3786-3796.

29  
30 36. Rifas-Shiman S.L., Fleisch A., Hivert M.F., Mantzoros C., Gillman M.W., Oken E. First  
31 and second trimester gestational weight gains are most strongly associated with cord blood  
32 levels of hormones at delivery important for glycemic control and somatic growth. *Metabolism*  
33 2017; 69: 112-119.

34  
35 37. Arentson-Lantz E.J., Buhman K.K., Ajuwon K., Donkin S.S. Excess pregnancy weight  
36 gain leads to early indications of metabolic syndrome in a swine model of fetal programming.  
37 *Nutr Res* 2014; 34: 241-249.

38  
39 38. Teede H., Harrison C., Lombard C., Boyle J., East C., Brown W. Case for Action: proposal,  
40 obesity prevention through preventing excess weight gain during pregnancy and postpartum.  
41 2015.

**Table 1. Characteristics of pregnant women in the study cohort (n=2630)**

| Characteristic                                                   | Total       | Total gestational weight gain |                     |                  | P       |
|------------------------------------------------------------------|-------------|-------------------------------|---------------------|------------------|---------|
|                                                                  |             | Below<br>(n=392)              | Average<br>(n=1842) | Above<br>(n=396) |         |
| Maternal age (year), mean ± SD                                   | 29.4 ± 3.6  | 29.9 ± 3.8                    | 29.4 ± 3.5          | 28.5 ± 3.6       | <0.0001 |
| Maternal age ≥35 years, n (%)                                    | 241 (9.2)   | 51 (13)                       | 169 (9.2)           | 21 (5.3)         | 0.0002  |
| Nulliparous, n (%)                                               | 2216 (84.3) | 325 (82.9)                    | 1532 (83.2)         | 359 (90.7)       | 0.0027  |
| Education, university degree and above, n (%)                    | 2404 (91.5) | 362 (92.6)                    | 1702 (92.5)         | 340 (85.7)       | 0.0007  |
| ART, n (%)                                                       | 55 (2.1)    | 9 (2.3)                       | 37 (2)              | 9 (2.3)          | 0.9834  |
| Tobacco smoking, n (%)                                           | 72 (2.7)    | 7 (1.8)                       | 41 (2.2)            | 24 (6.1)         | <0.0001 |
| Alcohol use, n (%)                                               | 338 (12.9)  | 52 (13.3)                     | 240 (13)            | 46 (11.6)        | 0.7221  |
| Pre-pregnancy BMI (kg/m <sup>2</sup> ), mean ± SD                | 21.3 ± 3.0  | 21.7 ± 3.1                    | 21.2 ± 3.0          | 21.5 ± 2.9       | 0.0139  |
| Pre-pregnancy BMI categories, n (%)                              |             |                               |                     |                  |         |
| Underweight (< 18.5 kg/m <sup>2</sup> )                          | 396 (15.1)  | 54 (13.8)                     | 292 (15.9)          | 50 (12.6)        | 0.7530  |
| Normal weight (18.5–24.9 kg/m <sup>2</sup> )                     | 1980 (75.3) | 298 (76)                      | 1372 (74.5)         | 310 (78.3)       |         |
| Overweight and obese (≥ 25 kg/m <sup>2</sup> )                   | 254 (9.7)   | 40 (10.2)                     | 178 (9.7)           | 36 (9.1)         |         |
| Gestational age at the first prenatal visit (week), median (IQR) | 15 (3)      | 14 (3)                        | 15 (3)              | 15 (3)           | 0.1986  |
| GWG in early pregnancy by BMI categories (kg), mean ± SD         |             |                               |                     |                  |         |
| All women                                                        | 2.2 ± 2.9   | -0.2 ± 2.8                    | 2.1 ± 2.2           | 4.9 ± 3.2        | <0.0001 |
| Underweight (< 18.5 kg/m <sup>2</sup> )                          | 2.5 ± 2.4   | 0.9 ± 1.9                     | 2.4 ± 2.0           | 4.8 ± 3.0        | <0.0001 |
| Normal weight (18.5–24.9 kg/m <sup>2</sup> )                     | 2.3±2.8     | 0.0 ± 2.8                     | 2.2 ± 2.2           | 4.9 ± 3.1        | <0.0001 |
| Overweight and obese (≥ 25 kg/m <sup>2</sup> )                   | 1.4±3.6     | -2.2 ± 3.3                    | 1.5 ± 2.6           | 4.7 ± 4.4        | <0.0001 |

1  
2  
3 GWG in late pregnancy by BMI categories (kg), mean  $\pm$  SD

|                                                        |                |               |                |                |         |
|--------------------------------------------------------|----------------|---------------|----------------|----------------|---------|
| 4 All women                                            | 13.0 $\pm$ 3.5 | 8.2 $\pm$ 3.0 | 12.6 $\pm$ 2.9 | 17.8 $\pm$ 3.6 | <0.0001 |
| 5 Underweight (< 18.5 kg/m <sup>2</sup> )              | 13.0 $\pm$ 3.5 | 8.9 $\pm$ 1.9 | 12.8 $\pm$ 2.5 | 18.2 $\pm$ 3.8 | <0.0001 |
| 6 Normal weight (18.5–24.9 kg/m <sup>2</sup> )         | 12.9 $\pm$ 4.0 | 8.4 $\pm$ 3.0 | 12.8 $\pm$ 2.8 | 17.8 $\pm$ 3.6 | <0.0001 |
| 7 Overweight and obese ( $\geq$ 25 kg/m <sup>2</sup> ) | 11.0 $\pm$ 4.9 | 5.8 $\pm$ 3.3 | 10.8 $\pm$ 3.8 | 17.4 $\pm$ 3.8 | <0.0001 |

8  
9  
10  
11 GWG in whole pregnancy by BMI categories (kg), mean  $\pm$  SD

|                                                         |                |               |                |                |         |
|---------------------------------------------------------|----------------|---------------|----------------|----------------|---------|
| 12 All women                                            | 15.0 $\pm$ 4.9 | 8.1 $\pm$ 2.6 | 14.8 $\pm$ 2.7 | 22.7 $\pm$ 2.9 | <0.0001 |
| 13 Underweight (< 18.5 kg/m <sup>2</sup> )              | 15.4 $\pm$ 4.2 | 9.7 $\pm$ 1.6 | 15.2 $\pm$ 2.3 | 23.1 $\pm$ 3.0 | <0.0001 |
| 14 Normal weight (18.5–24.9 kg/m <sup>2</sup> )         | 15.2 $\pm$ 4.7 | 8.4 $\pm$ 2.1 | 15.0 $\pm$ 2.5 | 22.7 $\pm$ 2.8 | <0.0001 |
| 15 Overweight and obese ( $\geq$ 25 kg/m <sup>2</sup> ) | 12.3 $\pm$ 6.1 | 3.7 $\pm$ 2.4 | 12.3 $\pm$ 3.7 | 22.0 $\pm$ 3.6 | <0.0001 |

16  
17  
18  
19 Gestational age at delivery (week), median (IQR)

|        |        |        |        |        |
|--------|--------|--------|--------|--------|
| 39 (2) | 39 (2) | 39 (2) | 39 (2) | 0.0793 |
|--------|--------|--------|--------|--------|

20 Birth weight (g), mean  $\pm$  SD

|                |                |                |                |         |
|----------------|----------------|----------------|----------------|---------|
| 3376 $\pm$ 450 | 3238 $\pm$ 422 | 3370 $\pm$ 438 | 3540 $\pm$ 480 | <0.0001 |
|----------------|----------------|----------------|----------------|---------|

21  
22  
23  
24 Male infant, n (%)

|             |            |          |            |        |
|-------------|------------|----------|------------|--------|
| 1334 (51.4) | 194 (50.4) | 945 (52) | 195 (49.5) | 0.7951 |
|-------------|------------|----------|------------|--------|

25 ART: assisted reproductive technology; BMI: body mass index; GWG: gestational weight gain; IQR: interquartile range; SD: standard deviation.

26  
27  
28  
29  
30  
31  
32  
33  
34  
35  
36  
37  
38  
39  
40  
41  
42  
43  
44  
45  
46



## Figure Legend

### Figure 1. Study flow chart.

### Figure 2. Associations of gestational weight gain with pregnancy outcomes.

(A) Associations of early gestational weight gain ( $\leq 17$  week) with pregnancy outcomes. (B) Associations of late gestational weight gain ( $> 17$  week) with pregnancy outcomes. (C) Associations of total gestational weight gain with pregnancy outcomes.

NICU: neonatal intensive care unit; LGA: large for gestational age; SGA: small for gestational age; GDM: gestational diabetes mellitus; PIH: pregnancy-induced hypertension; GWG: gestational weight gain; ARR: adjusted relative risk. \* $< 0.05$

Average GWG group as the reference.

<sup>a1</sup> The analysis was adjusted for maternal age, parity, pre-pregnancy BMI and length of gestation.

<sup>b1</sup> The analysis was adjusted for parity, pre-pregnancy BMI, fetal sex, GDM and PIH.

<sup>c1</sup> The analysis was adjusted for pre-pregnancy BMI, fetal sex, alcohol/tobacco use, length of gestation, GDM and PIH.

<sup>d1</sup> The analysis was adjusted for maternal age, alcohol/tobacco use, GDM and PIH.

<sup>a2</sup> The analysis was adjusted for maternal age and pre-pregnancy BMI.;

<sup>b2</sup> The analysis was adjusted for parity, pre-pregnancy BMI, fetal sex and length of gestation.

<sup>c2</sup> The analysis was adjusted for maternal age, parity, pre-pregnancy BM, GDM and PIH.

<sup>d2</sup> The analysis was adjusted for parity, pre-pregnancy BMI, fetal sex, GDM and PIH.

<sup>e2</sup> The analysis was adjusted for parity, pre-pregnancy BMI, alcohol/tobacco use, length of gestation, GDM and PIH.

<sup>f2</sup> The analysis was adjusted for maternal age, alcohol/tobacco use and length of gestation.

<sup>a3</sup> The analysis was adjusted for maternal age, parity, pre-pregnancy BMI, alcohol/tobacco use and fetal sex.

<sup>b3</sup> The analysis was adjusted for parity, pre-pregnancy BMI and length of gestation.

<sup>c3</sup> The analysis was adjusted for parity, pre-pregnancy BMI, length of gestation, GDM and PIH.

<sup>d3</sup> The analysis was adjusted for maternal age, parity and length of gestation.

<sup>e3</sup> The analysis was adjusted for pre-pregnancy BMI, fetal sex, length of gestation, GDM and PIH.

1  
2  
3  
4 **Figure 3. Associations of late gestational weight gain (>17 week) with pregnancy**  
5  
6 **outcomes, stratified by fetal sex.**  
7

8  
9 NICU: neonatal intensive care unit; LGA: large for gestational age; SGA: small for gestational age; GDM:  
10 gestational diabetes mellitus; PIH: pregnancy-induced hypertension; GWG: gestational weight gain; ARR:  
11 adjusted relative risk.  
12

13  
14 \* $<0.05$   
15

16 Average GWG group as the reference.

17 <sup>a</sup> The analysis was adjusted for maternal age and pre-pregnancy BMI.

18  
19 <sup>b</sup> The analysis was adjusted for maternal age, parity, pre-pregnancy BMI, alcohol/tobacco use and length of  
20 gestation.  
21

22  
23 <sup>c</sup> The analysis was adjusted for maternal age, pre-pregnancy BMI, GDM and PIH.

24  
25 <sup>d</sup> The analysis was adjusted for parity, pre-pregnancy BMI, alcohol/tobacco use and length of gestation.

26  
27 <sup>e</sup> The analysis was adjusted for parity, alcohol/tobacco use, length of gestation, GDM and PIH.

28  
29 <sup>f</sup> The analysis was adjusted for parity, pre-pregnancy BMI, length of gestation, GDM and PIH.  
30  
31  
32  
33  
34  
35  
36  
37  
38  
39  
40  
41  
42  
43  
44  
45  
46  
47  
48  
49  
50  
51  
52  
53  
54  
55  
56  
57  
58  
59  
60

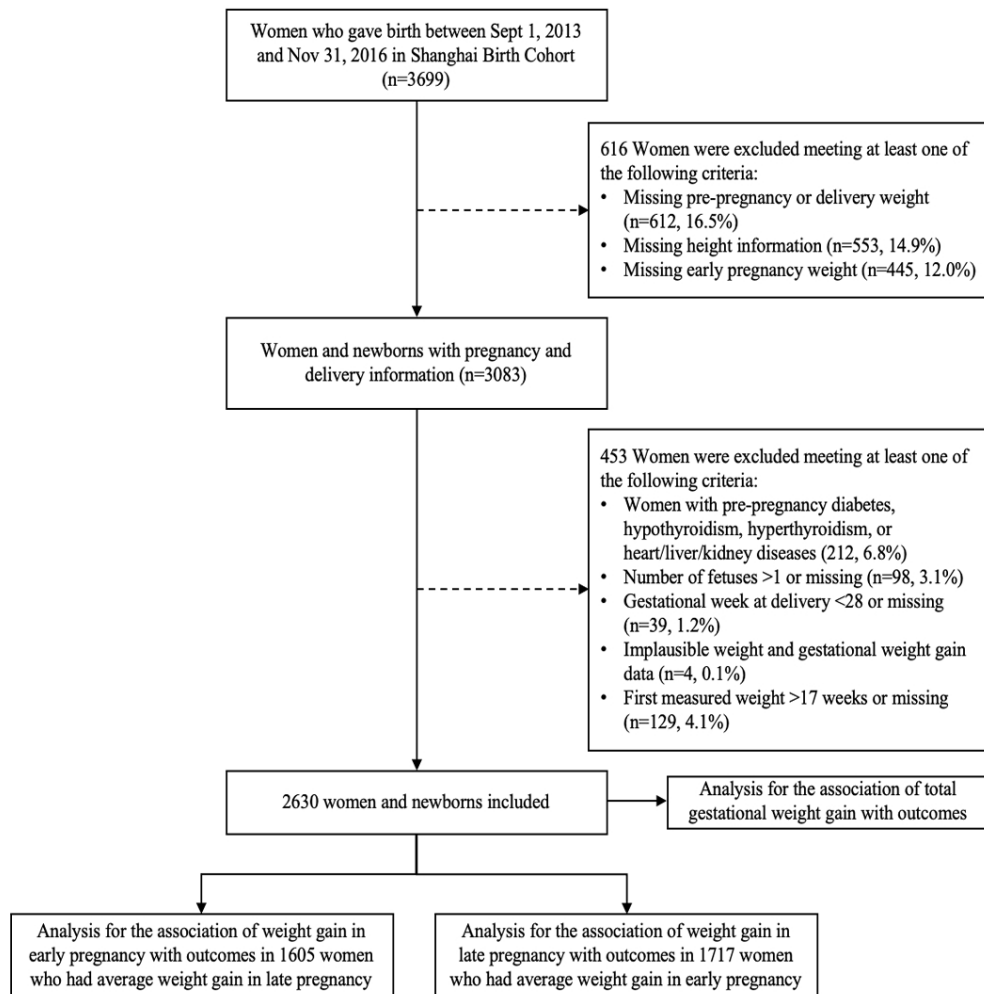

Figure 1. Study flow chart.

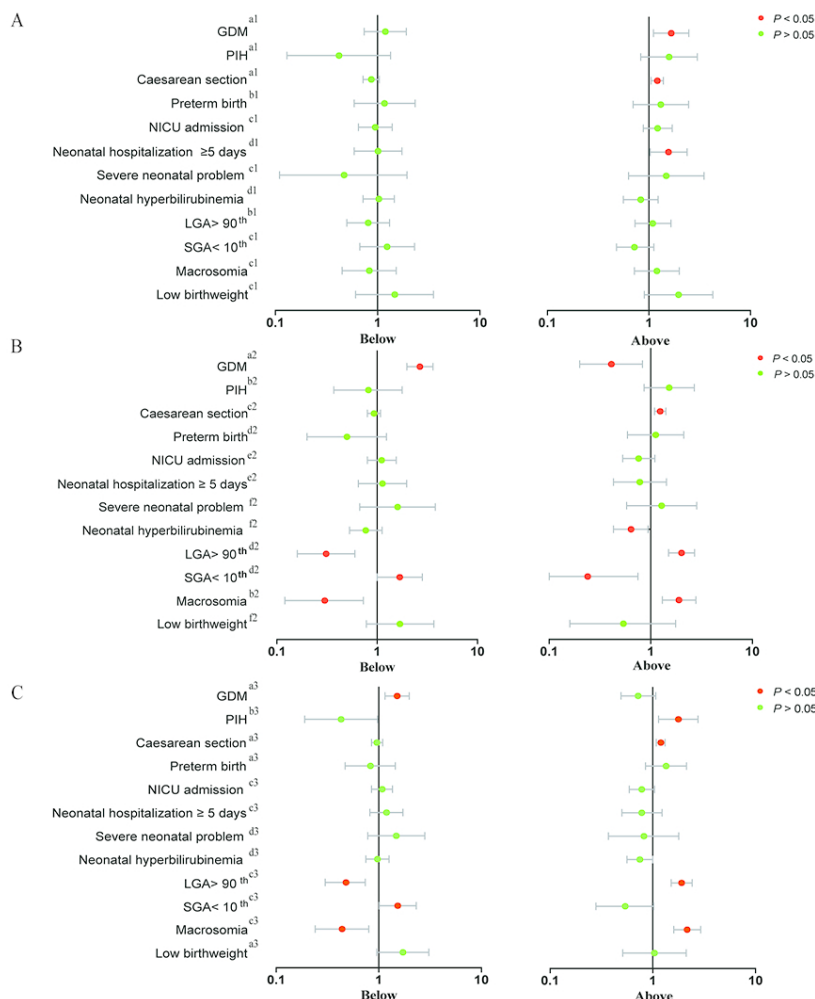

Figure 2. Associations of gestational weight gain with pregnancy outcomes. (A) Associations of early gestational weight gain ( $\leq 17$  week) with pregnancy outcomes. (B) Associations of late gestational weight gain ( $> 17$  week) with pregnancy outcomes. (C) Associations of total gestational weight gain with pregnancy outcomes. NICU: neonatal intensive care unit; LGA: large for gestational age; SGA: small for gestational age; GDM: gestational diabetes mellitus; PIH: pregnancy-induced hypertension; GWG: gestational weight gain; ARR: adjusted relative risk.  $* < 0.05$  Average GWG group as the reference. a1 The analysis was adjusted for maternal age, parity, pre-pregnancy BMI and length of gestation. b1 The analysis was adjusted for parity, pre-pregnancy BMI, fetal sex, GDM and PIH. c1 The analysis was adjusted for pre-pregnancy BMI, fetal sex, alcohol/tobacco use, length of gestation, GDM and PIH. d1 The analysis was adjusted for maternal age, alcohol/tobacco use, GDM and PIH. a2 The analysis was adjusted for maternal age and pre-pregnancy BMI.; b2 The analysis was adjusted for parity, pre-pregnancy BMI, fetal sex and length of gestation. c2 The analysis was adjusted for maternal age, parity, pre-pregnancy BM, GDM and PIH. d2 The analysis was adjusted for parity, pre-pregnancy BMI, fetal sex, GDM and PIH. e2 The analysis was adjusted for parity, pre-pregnancy BMI, alcohol/tobacco use, length of gestation, GDM and PIH. f2 The analysis was adjusted for maternal age, alcohol/tobacco use and length of gestation. a3 The analysis was adjusted for maternal age, parity, pre-pregnancy BMI, alcohol/tobacco use and fetal sex. b3 The analysis was adjusted for parity, pre-pregnancy BMI and length of gestation. c3 The analysis was adjusted for parity, pre-pregnancy BMI, length of gestation, GDM and PIH. d3 The analysis was adjusted for maternal age, parity and length of gestation. e3 The analysis was adjusted for pre-pregnancy BMI, fetal sex, length of gestation, GDM and PIH.

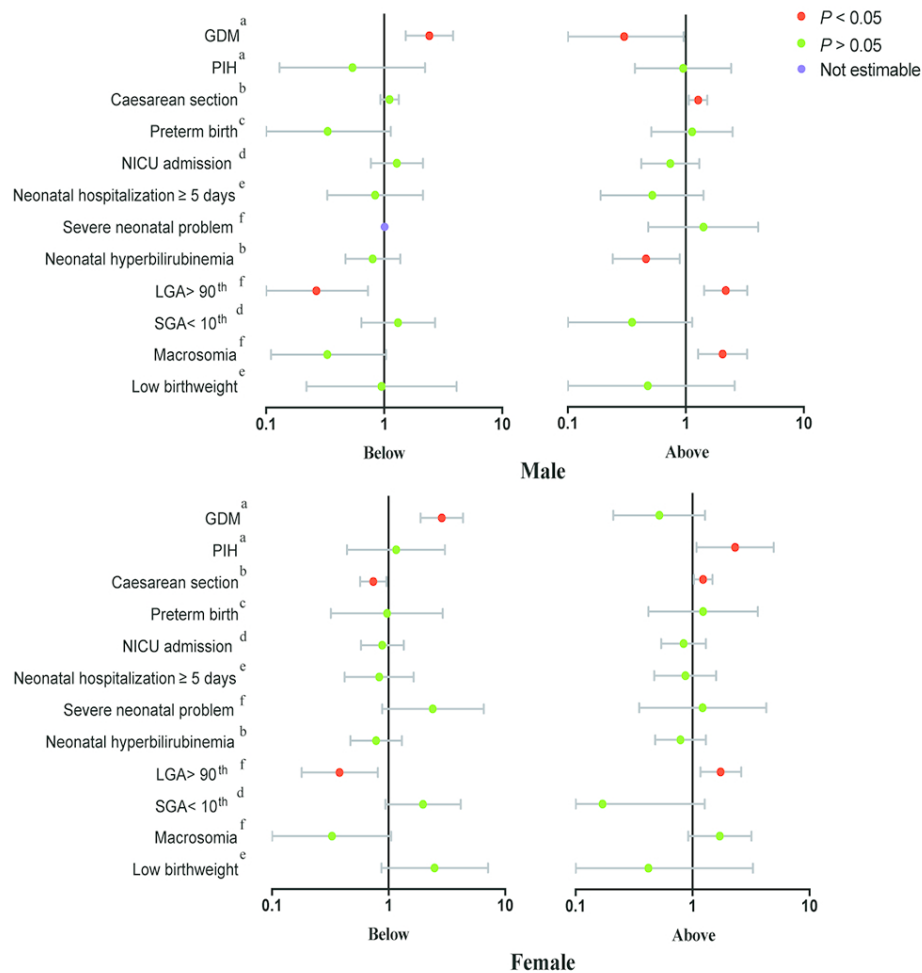

Figure 3. Associations of late gestational weight gain (>17 week) with pregnancy outcomes, stratified by fetal sex. NICU: neonatal intensive care unit; LGA: large for gestational age; SGA: small for gestational age; GDM: gestational diabetes mellitus; PIH: pregnancy-induced hypertension; GWG: gestational weight gain; ARR: adjusted relative risk. \* < 0.05 Average GWG group as the reference. a The analysis was adjusted for maternal age and pre-pregnancy BMI. b The analysis was adjusted for maternal age, parity, pre-pregnancy BMI, alcohol/tobacco use and length of gestation. c The analysis was adjusted for maternal age, pre-pregnancy BMI, GDM and PIH. d The analysis was adjusted for parity, pre-pregnancy BMI, alcohol/tobacco use and length of gestation. e The analysis was adjusted for parity, alcohol/tobacco use, length of gestation, GDM and PIH. f The analysis was adjusted for parity, pre-pregnancy BMI, length of gestation, GDM and PIH.

**Table S1. Maternal characteristics in the study of gestational weight gain in early pregnancy ( $\leq 17$  week)**

| Characteristic                                                   | Below (n=186)  | Average (n=1233) | Above (n=186)  | <i>P</i> |
|------------------------------------------------------------------|----------------|------------------|----------------|----------|
| Maternal age (year), mean $\pm$ SD                               | 28.2 $\pm$ 3.4 | 29.4 $\pm$ 3.7   | 29.4 $\pm$ 3.5 | 0.0002   |
| Maternal age $\geq 35$ years, n (%)                              | 11 (5.9)       | 126 (10.2)       | 14 (7.5)       | 0.5946   |
| Nulliparous, n (%)                                               | 165 (88.7)     | 1011 (82)        | 155 (83.3)     | 0.1683   |
| Education, university degree and above, n (%)                    | 164 (88.1)     | 1138 (92.4)      | 162 (87.6)     | 0.8411   |
| ART, n (%)                                                       | 4 (2.2)        | 27 (2.2)         | 5 (2.7)        | 0.9110   |
| Tobacco smoking, n (%)                                           | 4 (2.2)        | 26 (2.1)         | 9 (4.8)        | 0.0924   |
| Alcohol use, n (%)                                               | 15 (8.1)       | 129 (10.5)       | 18 (9.37)      | 0.5876   |
| Pre-pregnancy BMI ( $\text{kg}/\text{m}^2$ ), mean $\pm$ SD      | 21.8 $\pm$ 3.1 | 21.2 $\pm$ 3.0   | 21.7 $\pm$ 3.1 | 0.0027   |
| Pre-pregnancy BMI categories, n (%)                              |                |                  |                |          |
| Underweight ( $< 18.5 \text{ kg}/\text{m}^2$ )                   | 28 (15.1)      | 193 (15.7)       | 28 (15.1)      |          |
| Normal weight ( $18.5\text{--}24.9 \text{ kg}/\text{m}^2$ )      | 134 (72)       | 929 (75.3)       | 133 (71.5)     | 0.9848   |
| Overweight and obese ( $\geq 25 \text{ kg}/\text{m}^2$ )         | 24 (12.9)      | 111 (9)          | 25 (13.4)      |          |
| Gestational age at the first prenatal visit (week), median (IQR) | 14 (3)         | 14 (3)           | 15 (3)         | 0.8298   |
| GWG in early pregnancy by BMI categories (kg), mean $\pm$ SD     |                |                  |                |          |
| All women                                                        | -2.5 $\pm$ 2.0 | 2.1 $\pm$ 1.5    | 6.7 $\pm$ 2.1  | <0.0001  |
| Underweight ( $< 18.5 \text{ kg}/\text{m}^2$ )                   | -0.6 $\pm$ 1.1 | 2.1 $\pm$ 1.2    | 6.4 $\pm$ 2.1  | <0.0001  |
| Normal weight ( $18.5\text{--}24.9 \text{ kg}/\text{m}^2$ )      | -2.5 $\pm$ 1.7 | 2.1 $\pm$ 1.5    | 7.0 $\pm$ 2.1  | <0.0001  |
| Overweight and obese ( $\geq 25 \text{ kg}/\text{m}^2$ )         | -4.7 $\pm$ 1.7 | 1.5 $\pm$ 1.8    | 5.7 $\pm$ 1.7  | <0.0001  |
| GWG in late pregnancy by BMI categories (kg), mean $\pm$ SD      |                |                  |                |          |
| All women                                                        | 12.5 $\pm$ 2.3 | 12.6 $\pm$ 2.3   | 12.3 $\pm$ 2.4 | 0.4854   |

1  
2  
3  
4  
5  
6  
7  
8  
9  
10  
11  
12  
13  
14  
15  
16  
17  
18  
19  
20  
21  
22  
23  
24  
25  
26  
27  
28  
29  
30  
31  
32  
33  
34  
35  
36  
37  
38  
39  
40  
41  
42  
43  
44  
45  
46

|                                                  |            |            |            |        |
|--------------------------------------------------|------------|------------|------------|--------|
| Underweight (< 18.5 kg/m <sup>2</sup> )          | 12.4 ± 1.9 | 12.7 ± 1.9 | 12.5 ± 1.8 | 0.6323 |
| Normal weight (18.5–24.9 kg/m <sup>2</sup> )     | 12.8 ± 2.2 | 12.7 ± 2.2 | 12.6 ± 2.1 | 0.8492 |
| Overweight and obese (≥ 25 kg/m <sup>2</sup> )   | 10.7 ± 2.2 | 11.1 ± 3.1 | 10.4 ± 3.3 | 0.5676 |
| Gestational age at delivery (week), median (IQR) | 39 (2)     | 39 (2)     | 39 (2)     | 0.9126 |
| Birth weight (g), mean ± SD                      | 3296 ± 435 | 3370 ± 446 | 3382 ± 515 | 0.0428 |
| Male infant, n (%)                               | 92 (50.3)  | 646 (53.2) | 102 (55.4) | 0.6091 |

ART: assisted reproductive technology; BMI: body mass index; GWG: gestational weight gain; IQR: interquartile range; SD: standard deviation.

For peer review only

**Table S2. Maternal characteristics in the study of gestational weight gain in late pregnancy (>17 week)**

| Characteristic                                                   | Below (n=236) | Average (n=1233) | Above (n=248) | <i>P</i> |
|------------------------------------------------------------------|---------------|------------------|---------------|----------|
| Maternal age (year), mean ± SD                                   | 30.4 ± 3.8    | 29.4 ± 3.7       | 27.9 ± 3.5    | <0.0001  |
| Maternal age ≥35 years, n (%)                                    | 37 (15.7)     | 126 (10.2)       | 10 (4)        | <0.0001  |
| Nulliparous, n (%)                                               | 183 (77.5)    | 1011 (82)        | 234 (94.4)    | <0.0001  |
| Education, university degree and above, n (%)                    | 222 (94.1)    | 1138 (92.4)      | 214 (86.3)    | 0.0017   |
| ART, n (%)                                                       | 7 (3)         | 27 (2.2)         | 6 (2.4)       | 0.7701   |
| Tobacco smoking, n (%)                                           | 4 (1.7)       | 26 (2.1)         | 12 (4.8)      | 0.0234   |
| Alcohol use, n (%)                                               | 20 (8.5)      | 129 (10.5)       | 20 (8.1)      | 0.3841   |
| Pre-pregnancy BMI (kg/m <sup>2</sup> ), mean ± SD                | 21.6 ± 3.1    | 21.2 ± 3.0       | 21.4 ± 3.1    | 0.0564   |
| Pre-pregnancy BMI categories, n (%)                              |               |                  |               |          |
| Underweight (< 18.5 kg/m <sup>2</sup> )                          | 29 (12.3)     | 193 (15.7)       | 37 (14.9)     |          |
| Normal weight (18.5–24.9 kg/m <sup>2</sup> )                     | 178 (75.4)    | 929 (75.3)       | 189 (76.2)    | 0.3711   |
| Overweight and obese (≥ 25 kg/m <sup>2</sup> )                   | 29 (12.3)     | 111 (9)          | 22 (8.9)      |          |
| Gestational age at the first prenatal visit (week), median (IQR) | 14 (3)        | 14 (3)           | 14 (3)        | 0.4231   |
| GWG in early pregnancy by BMI categories (kg), mean ± SD         |               |                  |               |          |
| All women                                                        | 2.1 ± 1.5     | 2.1 ± 1.5        | 2.3 ± 1.4     | 0.1943   |
| Underweight (< 18.5 kg/m <sup>2</sup> )                          | 2.7 ± 1.4     | 2.1 ± 1.2        | 2.8 ± 1.3     | 0.0009   |
| Normal weight (18.5–24.9 kg/m <sup>2</sup> )                     | 2.1 ± 1.5     | 2.1 ± 1.5        | 2.2 ± 1.5     | 0.7273   |
| Overweight and obese (≥ 25 kg/m <sup>2</sup> )                   | 1.5 ± 1.6     | 1.5 ± 1.8        | 2.1 ± 1.2     | 0.2109   |
| GWG in late pregnancy by BMI categories (kg), mean ± SD          |               |                  |               |          |
| All women                                                        | 7.0 ± 2.1     | 12.6 ± 2.3       | 19.1 ± 2.4    | <0.0001  |



1  
2  
3  
4  
5  
6  
7  
8  
9  
10  
11  
12  
13  
14  
15  
16  
17  
18  
19  
20  
21  
22  
23  
24  
25  
26  
27  
28  
29  
30  
31  
32  
33  
34  
35  
36  
37  
38  
39  
40  
41  
42  
43  
44  
45  
46

|                                                  |            |            |            |         |
|--------------------------------------------------|------------|------------|------------|---------|
| Underweight (< 18.5 kg/m <sup>2</sup> )          | 7.9 ± 1.2  | 12.7 ± 1.9 | 19.2 ± 2.6 | <0.0001 |
| Normal weight (18.5–24.9 kg/m <sup>2</sup> )     | 7.3 ± 1.9  | 12.7 ± 2.2 | 19.1 ± 2.2 | <0.0001 |
| Overweight and obese (≥ 25 kg/m <sup>2</sup> )   | 4.1 ± 1.9  | 11.1 ± 3.1 | 18.3 ± 3.2 | <0.0001 |
| Gestational age at delivery (week), median (IQR) | 39 (2)     | 39 (2)     | 39 (2)     | 0.0872  |
| Birth weight (g), mean ± SD                      | 3261 ± 397 | 3370 ± 446 | 3536 ± 461 | <0.0001 |
| Male infant, n (%)                               | 110 (47.8) | 646 (53.2) | 120 (49)   | 0.8381  |

ART: assisted reproductive technology; BMI: body mass index; GWG: gestational weight gain; IQR: interquartile range; SD: standard deviation.

For peer review only

**Table S3. Association of pregnancy outcomes by gestational weight gain in early pregnancy ( $\leq 17$  week)**

| Outcomes                            | Below (n=186) |                   | Average (n=1233) |           | Above (n=186) |                    |
|-------------------------------------|---------------|-------------------|------------------|-----------|---------------|--------------------|
|                                     | n (%)         | aRR (95% CI)      | n (%)            | aRR       | n (%)         | aRR (95% CI)       |
| GDM                                 | 18 (9.7)      | 1.19 (0.74, 1.91) | 97 (7.9)         | Reference | 25 (13.4)     | 1.66 (1.11, 2.48)* |
| PIH                                 | 3 (1.6)       | 0.42 (0.13, 1.34) | 44 (3.6)         | Reference | 11 (5.9)      | 1.58 (0.83, 3.00)  |
| Caesarean section                   | 71 (41)       | 0.87 (0.72, 1.04) | 548 (47.3)       | Reference | 101 (56.7)    | 1.21 (1.05, 1.39)* |
| Preterm birth                       | 9 (4.8)       | 1.17 (0.59, 2.33) | 54 (4.4)         | Reference | 11 (5.9)      | 1.31 (0.70, 2.46)  |
| NICU admission                      | 24 (12.9)     | 0.95 (0.65, 1.39) | 168 (13.6)       | Reference | 31 (16.7)     | 1.22 (0.88, 1.70)  |
| Neonatal hospitalization $\geq 5$ d | 12 (6.5)      | 1.01 (0.59, 1.73) | 71 (5.8)         | Reference | 17 (9.1)      | 1.56 (1.03, 2.38)* |
| Severe neonatal problem             | 2 (1.1)       | 0.47 (0.11, 1.94) | 26 (2.1)         | Reference | 6 (3.2)       | 1.48 (0.63, 3.50)  |
| Neonatal hyperbilirubinemia         | 30 (16.1)     | 1.03 (0.72, 1.46) | 191 (15.5)       | Reference | 24 (12.9)     | 0.83 (0.56, 1.23)  |
| LGA $> 90^{\text{th}}$              | 17 (9.3)      | 0.81 (0.50, 1.31) | 132 (10.9)       | Reference | 23 (12.5)     | 1.09 (0.73, 1.65)  |
| SGA $< 10^{\text{th}}$              | 11 (6)        | 1.24 (0.67, 2.30) | 60 (5)           | Reference | 8 (4.3)       | 0.72 (0.48, 1.12)  |
| Macrosomia                          | 11 (5.9)      | 0.83 (0.45, 1.52) | 84 (6.9)         | Reference | 16 (8.6)      | 1.20 (0.72, 1.99)  |
| Low birthweight                     | 6 (3.2)       | 1.47 (0.61, 3.52) | 26 (2.1)         | Reference | 8 (4.3)       | 1.96 (0.90, 4.26)  |

aRR: adjusted relative risk; CI: confidence interval; GDM: gestational diabetes mellitus; LGA: large for gestational age; NICU: neonatal intensive care unit;

PIH: pregnancy-induced hypertension; SGA: small for gestational age.

\* $P < 0.05$

**Table S4. Association of pregnancy outcomes with gestational weight gain in late pregnancy (>17 week)**

| Outcomes                            | Below (n=236) |                     | Average (n=1233) |           | Above (n=248) |                     |
|-------------------------------------|---------------|---------------------|------------------|-----------|---------------|---------------------|
|                                     | n (%)         | aRR (95% CI)        | n (%)            | aRR       | n (%)         | aRR (95% CI)        |
| GDM                                 | 52 (22)       | 2.67 (1.98, 3.61) * | 97 (7.9)         | Reference | 8 (3.2)       | 0.41 (0.20, 0.83) * |
| PIH                                 | 7 (3)         | 0.82 (0.37, 1.78)   | 44 (3.6)         | Reference | 15 (6.1)      | 1.52 (0.86, 2.69)   |
| Caesarean section                   | 105 (46.9)    | 0.93 (0.80, 1.08)   | 548 (47.3)       | Reference | 129 (56.3)    | 1.24 (1.09, 1.41)*  |
| Preterm birth                       | 6 (2.5)       | 0.50 (0.20, 1.24)   | 54 (4.4)         | Reference | 12 (4.8)      | 1.12 (0.59, 2.12)   |
| NICU admission                      | 35 (14.8)     | 1.11 (0.80, 1.55)   | 168 (13.6)       | Reference | 27 (10.9)     | 0.76 (0.53, 1.10)   |
| Neonatal hospitalization $\geq 5$ d | 14 (5.9)      | 1.13 (0.65, 1.97)   | 71 (5.8)         | Reference | 11 (4.4)      | 0.78 (0.43, 1.43)   |
| Severe neonatal problem             | 6 (2.5)       | 1.60 (0.67, 3.80)   | 26 (2.1)         | Reference | 7 (2.8)       | 1.28 (0.58, 2.84)   |
| Neonatal hyperbilirubinemia         | 28 (11.9)     | 0.77 (0.53, 1.12)   | 191 (15.5)       | Reference | 25 (10.1)     | 0.64 (0.43, 0.94) * |
| LGA > 90 <sup>th</sup>              | 9 (3.9)       | 0.31 (0.16, 0.60)*  | 132 (10.9)       | Reference | 51 (20.8)     | 2.01 (1.50, 2.70)*  |
| SGA < 10 <sup>th</sup>              | 17 (7.4)      | 1.68 (1.00, 2.82) * | 60 (5)           | Reference | 3 (1.2)       | 0.24 (0.07, 0.75)*  |
| Macrosomia                          | 5 (2.1)       | 0.30 (0.12, 0.73)*  | 84 (6.9)         | Reference | 31 (12.6)     | 1.90 (1.30, 2.78)*  |
| Low birthweight                     | 8 (3.4)       | 1.69 (0.78, 3.68)   | 26 (2.1)         | Reference | 3 (1.2)       | 0.54 (0.16, 1.76)   |

aRR: adjusted relative risk; CI: confidence interval; GDM: gestational diabetes mellitus; LGA: large for gestational age; NICU: neonatal intensive care unit;

PIH: pregnancy-induced hypertension; SGA: small for gestational age.

\* $P < 0.05$

**Table S5. Association of pregnancy outcomes with gestational weight gain in late pregnancy (>17 week), by infant sex (27 sex unknown)**

| Outcomes                      | Male             |                    |                                   |           |                    | Female           |                    |                                   |           |                    |
|-------------------------------|------------------|--------------------|-----------------------------------|-----------|--------------------|------------------|--------------------|-----------------------------------|-----------|--------------------|
|                               | Below<br>(n=110) |                    | Average<br>(n=646)<br>(reference) |           | Above<br>(n=120)   | Below<br>(n=120) |                    | Average<br>(n=569)<br>(reference) |           | Above<br>(n=125)   |
|                               | n (%)            | aRR (95% CI)       | n (%)                             | n (%)     | aRR (95% CI)       | n (%)            | aRR (95% CI)       | n (%)                             | n (%)     | aRR (95% CI)       |
| GDM                           | 21(19.1)         | 2.41 (1.52, 3.84)* | 53 (8.2)                          | 3 (2.5)   | 0.30 (0.10, 0.96)* | 29(24.2)         | 2.86 (1.88, 4.35)* | 43 (7.6)                          | 5 (4)     | 0.52 (0.21, 1.28)  |
| PIH                           | 2 (1.8)          | 0.54 (0.13, 2.22)  | 25 (3.9)                          | 5 (4.2)   | 0.95 (0.37, 2.42)  | 5 (4.2)          | 1.16 (0.44, 3.04)  | 19 (3.3)                          | 9 (7.2)   | 2.31 (1.08, 4.95)  |
| Caesarean section             | 61 (57)          | 1.11 (0.93, 1.33)  | 291 (47.5)                        | 62 (56.4) | 1.27 (1.06, 1.52)* | 41(36.6)         | 0.74 (0.57, 0.96)* | 250 (47.3)                        | 66 (56.4) | 1.23(1.03, 1.48)*  |
| Preterm birth                 | 1 (0.9)          | 0.16 (0.02, 1.14)  | 35 (5.4)                          | 7 (5.8)   | 1.13 (0.51, 2.49)  | 4 (3.3)          | 0.97 (0.32, 2.91)  | 17 (3)                            | 4 (3.2)   | 1.23 (0.42, 3.62)  |
| NICU admission                | 16(14.6)         | 1.28 (0.77, 2.13)  | 86 (13.3)                         | 12 (10)   | 0.74 (0.42, 1.30)  | 16(13.3)         | 0.88 (0.58, 1.35)  | 75 (13.2)                         | 14 (11.2) | 0.84 (0.54, 1.30)  |
| Neonatal hospitalization ≥5 d | 5 (4.6)          | 0.84 (0.33, 2.13)  | 42 (6.5)                          | 4 (3.3)   | 0.52 (0.19, 1.41)  | 6 (5)            | 0.83 (0.42, 1.64)  | 28 (4.9)                          | 7 (5.6)   | 0.87 (0.47, 1.59)  |
| Severe neonatal problem       | 0                | NA                 | 17 (2.6)                          | 4 (3.3)   | 1.41 (0.48, 4.10)  | 5 (4.2)          | 2.39 (0.88, 6.54)  | 9 (1.6)                           | 3 (2.4)   | 1.22 (0.35, 4.27)  |
| Neonatal hyperbilirubinemia   | 13(11.8)         | 0.80 (0.47, 1.37)  | 100 (15.5)                        | 9 (7.5)   | 0.46 (0.24, 0.89)* | 15(12.5)         | 0.78 (0.47, 1.30)  | 90 (15.8)                         | 16 (12.8) | 0.79 (0.48, 1.30)  |
| LGA > 90 <sup>th</sup>        | 2 (1.8)          | 0.18 (0.04, 0.73)* | 62 (9.7)                          | 25 (20.8) | 2.18 (1.43, 3.32)* | 7 (5.8)          | 0.38 (0.18, 0.81)* | 70 (12.3)                         | 26 (20.8) | 1.74 (1.17, 2.61)* |
| SGA < 10 <sup>th</sup>        | 8 (7.3)          | 1.31 (0.64, 2.70)  | 37 (5.8)                          | 2 (1.7)   | 0.28 (0.07, 1.13)  | 9 (7.5)          | 1.97 (0.94, 4.15)  | 23 (4)                            | 1 (0.8)   | 0.17 (0.02, 1.27)  |
| Macrosomia                    | 3 (2.7)          | 0.33 (0.11, 1.04)  | 50 (7.8)                          | 19 (15.8) | 2.05 (1.27, 3.31)* | 2 (1.7)          | 0.26 (0.06, 1.05)  | 33 (5.8)                          | 12 (9.6)  | 1.71 (0.92, 3.19)  |
| Low birthweight               | 2 (1.8)          | 0.95 (0.22, 4.11)  | 14 (2.2)                          | 1 (0.8)   | 0.34 (0.05, 2.59)  | 5 (4.2)          | 2.48 (0.87, 7.11)  | 10 (1.8)                          | 1 (0.8)   | 0.42 (0.05, 3.29)  |

aRR: adjusted relative risk; CI: confidence interval; GDM: gestational diabetes mellitus; LGA: large for gestational age; NICU: neonatal intensive care unit; PIH: pregnancy-induced

hypertension; SGA: small for gestational age.

\* $P < 0.05$

**Table S6. Association of pregnancy outcomes with total gestational weight gain**

| Outcome                             | Below (n=392) |                    | Average (n=1842) |           | Above (n=396) |                    |
|-------------------------------------|---------------|--------------------|------------------|-----------|---------------|--------------------|
|                                     | n (%)         | aRR (95% CI)       | n (%)            | aRR       | n (%)         | aRR (95% CI)       |
| GDM                                 | 60 (15.3)     | 1.51 (1.15, 1.98)* | 176 (9.6)        | Reference | 27 (6.8)      | 0.72 (0.49, 1.07)  |
| PIH                                 | 6 (1.5)       | 0.43 (0.19, 0.97)* | 65 (3.5)         | Reference | 26 (6.6)      | 1.78 (1.14, 2.76)* |
| Caesarean section                   | 163 (45)      | 0.96 (0.85, 1.09)  | 778 (45.2)       | Reference | 203 (55.5)    | 1.20 (1.08, 1.32)* |
| Preterm birth                       | 15 (3.8)      | 0.83 (0.47, 1.45)  | 81 (4.4)         | Reference | 22 (5.6)      | 1.35 (0.85, 2.13)  |
| NICU admission                      | 61 (15.6)     | 1.08 (0.85, 1.36)  | 257 (14)         | Reference | 45 (11.4)     | 0.78 (0.59, 1.04)  |
| Neonatal hospitalization $\geq 5$ d | 27 (6.9)      | 1.19 (0.82, 1.72)  | 107 (5.8)        | Reference | 19 (4.8)      | 0.78 (0.50, 1.23)  |
| Severe neonatal problem             | 11 (2.8)      | 1.48 (0.78, 2.81)  | 37 (2)           | Reference | 7 (1.8)       | 0.82 (0.37, 1.79)  |
| Neonatal hyperbilirubinemia         | 58 (14.8)     | 0.97 (0.75, 1.26)  | 285 (15.5)       | Reference | 47 (11.9)     | 0.75 (0.56, 1.00)  |
| LGA > 90 <sup>th</sup>              | 20 (5.2)      | 0.48 (0.30, 0.74)* | 192 (10.6)       | Reference | 80 (20.4)     | 1.91 (1.51, 2.42)* |
| SGA < 10 <sup>th</sup>              | 27 (7)        | 1.53 (1.01, 2.32)* | 87 (4.8)         | Reference | 10 (2.5)      | 0.54 (0.28, 1.02)  |
| Macrosomia                          | 11 (2.8)      | 0.44 (0.24, 0.80)* | 115 (6.3)        | Reference | 53 (13.5)     | 2.16 (1.60, 2.93)* |
| Low birthweight                     | 15 (3.8)      | 1.72 (0.96, 3.08)  | 41 (2.2)         | Reference | 9 (2.3)       | 1.04 (0.51, 2.12)  |

aRR: adjusted relative risk; CI: confidence interval; GDM: gestational diabetes mellitus; LGA: large for gestational age; NICU: neonatal intensive care unit;

PIH: pregnancy-induced hypertension; SGA: small for gestational age.

\* $P < 0.05$

STROBE Statement—Checklist of items that should be included in reports of *cohort studies*

|                              | Item No | Recommendation                                                                                                                                                                                    | Page      |
|------------------------------|---------|---------------------------------------------------------------------------------------------------------------------------------------------------------------------------------------------------|-----------|
| <b>Title and abstract</b>    | 1       | (a) Indicate the study's design with a commonly used term in the title or the abstract                                                                                                            | 1         |
|                              |         | (b) Provide in the abstract an informative and balanced summary of what was done and what was found                                                                                               | 3-4       |
| <b>Introduction</b>          |         |                                                                                                                                                                                                   |           |
| Background/rationale         | 2       | Explain the scientific background and rationale for the investigation being reported                                                                                                              | 6         |
| Objectives                   | 3       | State specific objectives, including any prespecified hypotheses                                                                                                                                  | 7         |
| <b>Methods</b>               |         |                                                                                                                                                                                                   |           |
| Study design                 | 4       | Present key elements of study design early in the paper                                                                                                                                           | 7         |
| Setting                      | 5       | Describe the setting, locations, and relevant dates, including periods of recruitment, exposure, follow-up, and data collection                                                                   | 7         |
| Participants                 | 6       | (a) Give the eligibility criteria, and the sources and methods of selection of participants. Describe methods of follow-up                                                                        | 8         |
|                              |         | (b) For matched studies, give matching criteria and number of exposed and unexposed                                                                                                               | n/a       |
| Variables                    | 7       | Clearly define all outcomes, exposures, predictors, potential confounders, and effect modifiers. Give diagnostic criteria, if applicable                                                          | 9-11      |
| Data sources/<br>measurement | 8*      | For each variable of interest, give sources of data and details of methods of assessment (measurement). Describe comparability of assessment methods if there is more than one group              | 9         |
| Bias                         | 9       | Describe any efforts to address potential sources of bias                                                                                                                                         | 9         |
| Study size                   | 10      | Explain how the study size was arrived at                                                                                                                                                         | 8         |
| Quantitative variables       | 11      | Explain how quantitative variables were handled in the analyses. If applicable, describe which groupings were chosen and why                                                                      | 10-11     |
| Statistical methods          | 12      | (a) Describe all statistical methods, including those used to control for confounding                                                                                                             | 12-13     |
|                              |         | (b) Describe any methods used to examine subgroups and interactions                                                                                                                               | 12        |
|                              |         | (c) Explain how missing data were addressed                                                                                                                                                       | 12        |
|                              |         | (d) If applicable, explain how loss to follow-up was addressed                                                                                                                                    | 12        |
|                              |         | (e) Describe any sensitivity analyses                                                                                                                                                             | n/a       |
| <b>Results</b>               |         |                                                                                                                                                                                                   |           |
| Participants                 | 13*     | (a) Report numbers of individuals at each stage of study—eg numbers potentially eligible, examined for eligibility, confirmed eligible, included in the study, completing follow-up, and analysed | 13        |
|                              |         | (b) Give reasons for non-participation at each stage                                                                                                                                              | fig 1     |
|                              |         | (c) Consider use of a flow diagram                                                                                                                                                                | fig 1     |
| Descriptive data             | 14*     | (a) Give characteristics of study participants (eg demographic, clinical, social) and information on exposures and potential confounders                                                          | table 1   |
|                              |         | (b) Indicate number of participants with missing data for each variable of interest                                                                                                               | n/a       |
|                              |         | (c) Summarise follow-up time (eg, average and total amount)                                                                                                                                       | 13        |
| Outcome data                 | 15*     | Report numbers of outcome events or summary measures over time                                                                                                                                    | table 2-3 |
| Main results                 | 16      | (a) Give unadjusted estimates and, if applicable, confounder-adjusted                                                                                                                             | 14-15     |

|                          |    |                                                                                                                                                                            |       |
|--------------------------|----|----------------------------------------------------------------------------------------------------------------------------------------------------------------------------|-------|
|                          |    | estimates and their precision (eg, 95% confidence interval). Make clear which confounders were adjusted for and why they were included                                     |       |
|                          |    | (b) Report category boundaries when continuous variables were categorized                                                                                                  | n/a   |
|                          |    | (c) If relevant, consider translating estimates of relative risk into absolute risk for a meaningful time period                                                           | n/a   |
| Other analyses           | 17 | Report other analyses done—eg analyses of subgroups and interactions, and sensitivity analyses                                                                             | 15    |
| <b>Discussion</b>        |    |                                                                                                                                                                            |       |
| Key results              | 18 | Summarise key results with reference to study objectives                                                                                                                   | 16    |
| Limitations              | 19 | Discuss limitations of the study, taking into account sources of potential bias or imprecision. Discuss both direction and magnitude of any potential bias                 | 16-17 |
| Interpretation           | 20 | Give a cautious overall interpretation of results considering objectives, limitations, multiplicity of analyses, results from similar studies, and other relevant evidence | 17-22 |
| Generalisability         | 21 | Discuss the generalisability (external validity) of the study results                                                                                                      | 22    |
| <b>Other information</b> |    |                                                                                                                                                                            |       |
| Funding                  | 22 | Give the source of funding and the role of the funders for the present study and, if applicable, for the original study on which the present article is based              | 23    |

\*Give information separately for exposed and unexposed groups.

**Note:** An Explanation and Elaboration article discusses each checklist item and gives methodological background and published examples of transparent reporting. The STROBE checklist is best used in conjunction with this article (freely available on the Web sites of PLoS Medicine at <http://www.plosmedicine.org/>, Annals of Internal Medicine at <http://www.annals.org/>, and Epidemiology at <http://www.epidem.com/>). Information on the STROBE Initiative is available at <http://www.strobe-statement.org>.

# BMJ Open

## Gestational weight gain and adverse pregnancy outcomes: a prospective cohort study

|                                 |                                                                                                                                                                                                                                                                                                                                                                                                                                                                                                                                                                                                                                                                                                                                                                                 |
|---------------------------------|---------------------------------------------------------------------------------------------------------------------------------------------------------------------------------------------------------------------------------------------------------------------------------------------------------------------------------------------------------------------------------------------------------------------------------------------------------------------------------------------------------------------------------------------------------------------------------------------------------------------------------------------------------------------------------------------------------------------------------------------------------------------------------|
| Journal:                        | <i>BMJ Open</i>                                                                                                                                                                                                                                                                                                                                                                                                                                                                                                                                                                                                                                                                                                                                                                 |
| Manuscript ID                   | bmjopen-2020-038187.R2                                                                                                                                                                                                                                                                                                                                                                                                                                                                                                                                                                                                                                                                                                                                                          |
| Article Type:                   | Original research                                                                                                                                                                                                                                                                                                                                                                                                                                                                                                                                                                                                                                                                                                                                                               |
| Date Submitted by the Author:   | 12-Jul-2020                                                                                                                                                                                                                                                                                                                                                                                                                                                                                                                                                                                                                                                                                                                                                                     |
| Complete List of Authors:       | Wu, Yuelin; Shanghai First Maternity and infant hospital, Department of Obstetrics<br>Wan, Sheng; Shanghai First Maternity and infant hospital, Department of Obstetrics<br>Gu, Shengyi; Xinhua Hospital, Shanghai Jiao Tong University School of Medicine, Department of Obstetrics and Gynecology<br>Mou, Zhengqian; Xinhua Hospital, Shanghai Jiao Tong University School of Medicine, Department of Obstetrics and Gynecology<br>Dong, Lingling; Shanghai First Maternity and infant hospital, Department of Obstetrics<br>Luo, Zhong-Cheng; Lunenfeld-Tanenbaum Research Institute, Obstetrics and Gynecology, Mount Sinai Hospital<br>Zhang, Jun ; Shanghai Jiao Tong University,<br>Hua, Xiaolin; Shanghai First Maternity and infant hospital, Department of Obstetrics |
| <b>Primary Subject Heading</b>: | Obstetrics and gynaecology                                                                                                                                                                                                                                                                                                                                                                                                                                                                                                                                                                                                                                                                                                                                                      |
| Secondary Subject Heading:      | Obstetrics and gynaecology                                                                                                                                                                                                                                                                                                                                                                                                                                                                                                                                                                                                                                                                                                                                                      |
| Keywords:                       | EPIDEMIOLOGY, Maternal medicine < OBSTETRICS, Fetal medicine < OBSTETRICS, OBSTETRICS                                                                                                                                                                                                                                                                                                                                                                                                                                                                                                                                                                                                                                                                                           |
|                                 |                                                                                                                                                                                                                                                                                                                                                                                                                                                                                                                                                                                                                                                                                                                                                                                 |

SCHOLARONE™  
Manuscripts





I, the Submitting Author has the right to grant and does grant on behalf of all authors of the Work (as defined in the below author licence), an exclusive licence and/or a non-exclusive licence for contributions from authors who are: i) UK Crown employees; ii) where BMJ has agreed a CC-BY licence shall apply, and/or iii) in accordance with the terms applicable for US Federal Government officers or employees acting as part of their official duties; on a worldwide, perpetual, irrevocable, royalty-free basis to BMJ Publishing Group Ltd ("BMJ") its licensees and where the relevant Journal is co-owned by BMJ to the co-owners of the Journal, to publish the Work in this journal and any other BMJ products and to exploit all rights, as set out in our [licence](#).

The Submitting Author accepts and understands that any supply made under these terms is made by BMJ to the Submitting Author unless you are acting as an employee on behalf of your employer or a postgraduate student of an affiliated institution which is paying any applicable article publishing charge ("APC") for Open Access articles. Where the Submitting Author wishes to make the Work available on an Open Access basis (and intends to pay the relevant APC), the terms of reuse of such Open Access shall be governed by a Creative Commons licence – details of these licences and which [Creative Commons](#) licence will apply to this Work are set out in our licence referred to above.

Other than as permitted in any relevant BMJ Author's Self Archiving Policies, I confirm this Work has not been accepted for publication elsewhere, is not being considered for publication elsewhere and does not duplicate material already published. I confirm all authors consent to publication of this Work and authorise the granting of this licence.

# Gestational weight gain and adverse pregnancy outcomes: a prospective cohort study

Yuelin Wu, MA<sup>1#</sup>, Sheng Wan, MD<sup>1#</sup>, Shengyi Gu, MA<sup>2</sup>, Zhengqian Mou, MA<sup>2</sup>, Lingling Dong, MA<sup>1</sup>, Zhongcheng Lou, PhD<sup>3</sup>, Jun Zhang, PhD<sup>2\*</sup>, Xiaolin Hua, MD<sup>1\*</sup>

1. Department of Obstetrics, Shanghai First Maternity and Infant Hospital, Shanghai Tongji University School of Medicine, Shanghai, China
2. Department of Obstetrics and Gynecology, Xinhua Hospital, Shanghai Jiao Tong University School of Medicine, Shanghai, China
3. Lunenfeld-Tanenbaum Research Institute, Obstetrics and Gynecology, Mount Sinai Hospital, Department of Obstetrics and Gynecology, University of Toronto, Toronto, Canada

**#These authors contributed equally to this work.**

**\*Correspondence:**

**Xiaolin Hua, MD**

Department of Obstetrics, Shanghai First Maternity and infant hospital, Shanghai Tongji University School of Medicine, Shanghai, China

2699 West Gaoke Road, Shanghai, China 201204

Tel: 021-20261000

1  
2  
3  
4 Fax: 021-20261000  
5

6  
7 Email: xiaolin\_hua@tongji.edu.cn  
8  
9

10  
11  
12 **Jun Zhang, PhD**  
13

14 Department of Obstetrics and Gynecology, Xinhua Hospital, Shanghai Jiao Tong University  
15

16  
17 School of Medicine  
18

19  
20 1665 Kongjiang Road, Shanghai, China 200092  
21

22  
23 Tel: 021-25078999  
24

25  
26 Fax: 021-25078293  
27

28  
29 Email: zhangjun@xinhumed.com.cn  
30  
31  
32  
33  
34  
35  
36  
37  
38  
39  
40  
41  
42  
43  
44  
45  
46  
47  
48  
49  
50  
51  
52  
53  
54  
55  
56  
57  
58  
59  
60

For peer review only

## Abstract

**Objective** To assess the associations of gestational weight gain (GWG) in early and late pregnancy with subsequent risks of adverse pregnancy outcomes in Chinese women.

**Design** Prospective cohort study.

**Setting** Shanghai, China.

**Participants** We studied 2630 nulliparous singleton pregnant women with complete data on weight gain in early ( $\leq 17$  week of gestation) and late ( $> 17$  week) pregnancy in the Shanghai Birth Cohort.

**Methods** GWG was standardized into z-scores by gestational age and categorized as low (z score  $< -1$ ), normal ( $-1$  to  $1$ ), and high ( $> 1$ ). The adjusted relative risks (aRRs) and 95% confidence intervals (CIs) were estimated through log-binomial regression models. Interaction effects between GWG and some other adjustment factors were tested, further stratified analyses were performed separately where interaction terms were significant.

1  
2  
3  
4 **Outcome measures** Adverse maternal and neonatal outcomes.  
5  
6  
7

8 **Results** Independent from GWG in late pregnancy, higher GWG in early pregnancy  
9  
10 was associated with higher risks of gestational diabetes mellitus (aRR: 1.66; 95% CI:  
11  
12 1.11–2.48), caesarean section (aRR: 1.21; 95% CI: 1.05–1.39), and prolonged  
13  
14 hospitalization (aRR: 1.56; 95% CI: 1.03–2.38). Higher GWG in late pregnancy was  
15  
16 independently associated with higher risks of caesarean section (aRR: 1.24; 95% CI:  
17  
18 1.09–1.41), large for gestational age (aRR: 2.01; 95% CI: 1.50–2.7), and macrosomia  
19  
20 (aRR: 1.90; 95% CI: 1.30–2.78). In addition, the risk of gestational hypertension  
21  
22 increased significantly with increased total GWG (aRR: 1.78; 95% CI: 1.14–2.76). The  
23  
24 effects of GWG in late pregnancy on maternal and neonatal outcomes were  
25  
26 significantly different between the women bearing a female and the women bearing  
27  
28 male fetus.  
29  
30  
31  
32  
33  
34  
35  
36  
37  
38  
39  
40  
41  
42  
43  
44  
45  
46  
47

48 **Conclusion** The GWG associations with adverse pregnancy outcomes differ at early  
49  
50 and late pregnancy, and there may be effect modification by fetal sex in the association  
51  
52 of GWG in late pregnancy with some pregnancy outcomes.  
53  
54  
55  
56  
57

58 **Keywords** gestational weight gain, pregnancy outcomes, z-scores, fetal sex  
59  
60

## Strengths and limitations of this study

1. Weight gain data collected before and during pregnancy enabled us to investigate the effect of timing of weight gain on the outcomes.
2. The use of z-scores instead of original weight gain value to account for the gestational-age-dependent nature of GWG allowed us to differentiate the effect caused by weight gain from the effect caused by duration of pregnancy.
3. Effect modification by fetal sex was investigated.
4. Only short-term rather than long-term pregnancy outcomes were investigated.
5. Pre-pregnancy weight was self-reported rather than measured.

## Introduction

Gestational weight gain (GWG) has been associated with pregnancy outcomes.

Insufficient weight gain has been linked with increased risks of low birth weight, small

for gestational age (SGA) and preterm birth, while excessive weight gain has been

associated with large for gestational age (LGA), gestational diabetes mellitus (GDM),

preeclampsia, preterm birth, caesarean section, infant mortality and childhood obesity<sup>[1-2]</sup>.

However, although women are routinely weighed in clinical settings and receive

gestational weight gain advice<sup>[3-4]</sup>, a high proportion of pregnant women gain above or

below GWG weight ranges recommended by the guidelines<sup>[5]</sup>. Based on data collected

from 23 studies involving more than 1.3 million women, GWG was below or above the

weight gain range suggested by Institute of Medicine (IOM) guidelines in 23% and 47%

of pregnancies, respectively<sup>[1]</sup>, and the prevalence of excess gestational weight gain

appears to be on the rise<sup>[6]</sup>.

It is well established that total GWG affects pregnancy outcomes<sup>[7]</sup>. Some studies

suggest that GWG during early pregnancy may be more important than GWG at late

pregnancy for developing certain pregnancy outcomes such as GDM and adverse

1  
2  
3  
4 cardio-metabolic profile in the offspring<sup>[8-11]</sup>. Overall, studies examining associations  
5  
6  
7  
8 of early GWG with perinatal outcomes have been relatively few, and these studies have  
9  
10  
11 often not accounted for the effects of weight gain during other periods of pregnancy<sup>[12]</sup>.  
12

13  
14 In a Chinese population-based study, our objective was to explore the association of  
15  
16  
17  
18 GWG during early and late pregnancy with maternal and neonatal outcomes .  
19

## 20 21 22 **Materials and Methods**

### 23 24 25 *Study design and data source*

26  
27  
28  
29  
30 This prospective cohort study is based on the recently developed Shanghai Birth Cohort  
31  
32  
33 (SBC) which has been described in details elsewhere<sup>[13]</sup>. Briefly, the SBC is a  
34  
35  
36  
37  
38 prospective observational study conducted in Shanghai, China, aiming to examine  
39  
40  
41 factors affecting fecundability, pregnancy outcomes, child growth and development,  
42  
43  
44 and risks of diseases. The cohort recruited 4127 women in pre-conception care (701)  
45  
46  
47  
48 or early antenatal care (3426). Written informed consent was obtained from the  
49  
50  
51  
52 participants. The data was collected between September 1st, 2013 and November 31th,  
53  
54  
55  
56 2016, resulting in 3699 live births. The collected data included maternal demographical  
57  
58  
59 characteristics, health behaviors, reproductive history, as well as clinical information  
60



1  
2  
3  
4 related to pregnancy, birth and pregnancy outcomes. This study was approved by  
5  
6  
7  
8 Xinhua Hospital Research Ethics Committee, Shanghai Jiao Tong University School of  
9  
10  
11 Medicine (reference number: XHEC-F-NSFC-2018-122).  
12  
13  
14

### 15 ***Study population***

16  
17  
18  
19 The present study collected the data from all singleton pregnancies in women with age  
20  
21  
22  
23  $\geq 20$  years old who started antenatal care before 17 week's gestation and delivered at  
24  
25  
26  
27  $\geq 28$  week of gestation with data available on weight gains in early and late gestation in  
28  
29  
30 the SBC cohort.  
31  
32

33 Gestational age was estimated based on the date of last menstruation period and  
34  
35  
36 confirmed by first trimester ultrasound date. The eligible data collected in this study  
37  
38  
39  
40 were obtained from: (1) self-reported pre-pregnancy weight (kg); (2) weight and height  
41  
42  
43 (cm) measured in early pregnancy (17 week of gestation or less); and (3) weight  
44  
45  
46 measured within the last week of pregnancy. Subjects were excluded if: (1) weight in  
47  
48  
49  
50 early pregnancy  $< 30$  kg or  $> 350$  kg; or (2) z-score of gestational weight gain  $< -4.0$   
51  
52  
53  
54 or  $> 4.0$ , the methods used in the study were similar to the study conducted by Johansson  
55  
56  
57  
58 et al<sup>[14]</sup>. Women with pre-existing medical conditions such as pre-gestational diabetes,  
59  
60

1  
2  
3  
4 hypo- or hyper-thyroidism (affecting GWG)<sup>[15]</sup> and heart/liver/kidney diseases were  
5  
6  
7  
8 also excluded.  
9

### 10 11 ***Weight measurements***

12  
13  
14  
15  
16 Pre-pregnancy weight (kg) was based on self-reporting, while weight at early  
17  
18  
19 pregnancy and at delivery was routinely measured to the nearest 0.1 kg using the  
20  
21  
22  
23 available electronic weighing device in the prenatal care clinics. Height (cm) at the first  
24  
25  
26 prenatal visit was routinely measured to the nearest 0.1 cm using the available  
27  
28  
29  
30 electronic stadiometer in the hospital. Pre-pregnancy body mass index (BMI; kg/m<sup>2</sup>)  
31  
32  
33 was calculated as pre-pregnancy weight (kg) divided by height (m)<sup>2</sup> and categorized as  
34  
35  
36  
37  
38  
39  
40  
41  
42  
43  
44  
45  
46  
47  
48  
49  
50  
51  
52  
53  
54  
55  
56  
57  
58  
59  
60  
underweight (<18.5 kg/m<sup>2</sup>), normal weight (18.5 to 24.9 kg/m<sup>2</sup>), overweight (25.0 to  
29.9 kg/m<sup>2</sup>), and obese (≥ 30.0 kg/m<sup>2</sup>)<sup>[16]</sup>.

The 2009 IOM recommendations suggested 0.5 to 2 kg weight gain for women in the  
first trimester (0 to 13 week)<sup>[5]</sup> and the 50<sup>th</sup> centile GWG for women at gestational age  
≤17 week is below 2 kg according to the INTERGROWTH-21<sup>st</sup> Project<sup>[2]</sup>. However,  
early pregnancy in this study was defined as gestational age ≤17 week so as to include  
virtually all women who started the first antenatal care in the hospital<sup>[17]</sup>. In addition,

1  
2  
3  
4 the 2009 IOM recommendations suggested total GWG of 12.5 to 18 kg for women with  
5  
6  
7  
8 pre-pregnancy BMI less than 18.5 (underweight); 11.5 to 16 kg for those with BMI of  
9  
10  
11 18.5 to 24.9 (normal weight); 7 to 11.5 kg for those with an initial BMI of 25.0 to 29.9  
12  
13  
14 (overweight); and 5 to 9 kg for those with an initial BMI greater than 30.0 (obese) [5].  
15  
16  
17

18 In this study, due to the sporadic number of obese women, we analyze them together  
19  
20  
21 with overweight women. We examined GWG in early pregnancy (the last weight  
22  
23  
24 measured  $\leq 17$  week minus pre-pregnancy weight) and late pregnancy (last  
25  
26  
27 measurement of weight prior to delivery minus the last weight measured  $\leq 17$  week).  
28  
29  
30

31  
32 Total GWG was calculated as last measurement of weight before delivery minus pre-  
33  
34  
35 pregnancy weight. All GWG values were standardized into z-scores by gestational age,  
36  
37  
38 stratified by BMI categories. The means and standard deviations (SD) of GWGs in  
39  
40  
41 early pregnancy and late pregnancy were used to convert the GWG values into z-scores.  
42  
43  
44

45  
46 All GWG z-scores were first examined as continuous variables, and then categorized  
47  
48  
49 as  $< -1.0$  (below),  $-1.0$  to  $+1.0$  (average) and  $> +1.0$  (above) in data analyses. The  
50  
51  
52 analyses for GWG in early pregnancy were restricted to women whose GWGs in late  
53  
54  
55 pregnancy were average ( $-1.0$  to  $+1.0$ ). Similarly, the analyses for late pregnancy  
56  
57  
58  
59  
60

1  
2  
3  
4 weight gain were restricted to women with weight gain value in early pregnancy within  
5  
6  
7  
8 -1.0 to +1.0.  
9

### 10 11 12 ***Covariates*** 13

14  
15  
16 Co-variables included fetal sex, maternal age (20 to 34,  $\geq 35$  years), parity (0,  $\geq 1$ ), pre-  
17  
18 pregnancy body mass index (BMI) categories (underweight, normal, overweight/obese),  
19  
20 alcohol/tobacco use (yes or no), GDM (yes or no), gestational hypertension (yes or no)  
21  
22  
23 and length of gestation (28 to 36,  $\geq 37$  week).  
24  
25  
26  
27  
28  
29

### 30 31 ***Outcomes*** 32

33  
34 The outcomes included gestational diabetes mellitus (GDM), gestational hypertension,  
35  
36 caesarean section, preterm birth, neonatal intensive care unit (NICU) admission,  
37  
38 neonatal prolonged hospitalization ( $\geq 5$  days), severe neonatal outcomes, neonatal  
39  
40 hyperbilirubinemia ( $\leq 12$  mg/dL), LGA, SGA, macrosomia ( $> 4000$  g) and low  
41  
42 birthweight ( $< 2500$  g).  
43  
44  
45  
46  
47  
48  
49

50  
51  
52 All women received a 75 g oral glucose tolerance test (OGTT) during 24-28 week of  
53  
54  
55 gestation. GDM was diagnosed according to the IADPSG criteria: if anyone had the  
56  
57  
58 glucose values fell at or above the following thresholds: fasting 5.1 mmol/L, 1 hour  
59  
60

1  
2  
3  
4 10.0 mmol/L, 2 hour 8.5 mmol/L. Gestational hypertension was defined as de novo  
5  
6  
7  
8 hypertension (systolic blood pressure  $\geq 140$  mmHg or diastolic blood pressure  $\geq 90$   
9  
10  
11 mmHg) after 20 week's gestation. Preterm birth was defined as gestational age at  
12  
13  
14 delivery  $< 37$  week. SGA was defined as birth weight  $\leq 10^{\text{th}}$  percentile, and LGA as birth  
15  
16  
17 weight  $\geq 90^{\text{th}}$  percentile according to Chinese sex- and gestational age-specific birth  
18  
19  
20 weight standards<sup>[18]</sup>. Severe neonatal outcomes included death, 5 minute APGAR score  
21  
22  
23  $< 7$ , hypoglycemia ( $< 40$  mg/dL), sepsis, cardiopulmonary resuscitation or ventilator  
24  
25  
26 support within 24 hours after birth, severe respiratory disorders (respiratory distress  
27  
28  
29 syndrome or transient tachypnea of the newborn), serious birth defects, seizures,  
30  
31  
32 necrotizing enterocolitis, and hypoxic-ischemic encephalopathy.  
33  
34  
35  
36  
37  
38  
39

### 40 ***Statistical analyses***

41  
42  
43  
44 Maternal demographic characteristics and clinical factors were compared across GWG  
45  
46  
47 groups. Continuous variables were described by mean with standard deviation (SD) or  
48  
49  
50 median with interquartile range (IQR). Categorical variables were described by  
51  
52  
53 frequencies (%). Analysis of variance or Kruskal-Wallis H tests were performed for  
54  
55  
56 continuous data, and chi-square tests or Fisher's exact tests were performed for  
57  
58  
59  
60

1  
2  
3  
4 categorical data.  
5  
6  
7

8 The incidence of adverse pregnancy outcomes were examined among three GWG  
9  
10  
11 groups. Multivariate log-binomial regression models were used to estimate the  
12  
13  
14 unadjusted relative risks (RRs), adjusted relative risks (ARRs) and 95% confidence  
15  
16  
17 intervals (CIs) of adverse pregnancy outcomes across GWG groups. Regression model  
18  
19  
20 for maternal outcomes were adjusted for only co-variables with  $p < 0.2$  (maternal age,  
21  
22  
23 parity, pre-pregnancy BMI, alcohol/tobacco use, fetal sex and length of gestation).  
24  
25  
26

27  
28  
29 Women with GDM or HIP have long been known to be at increased risk for adverse  
30  
31  
32 neonatal outcomes, including neonatal intensive care admission, cesarean section,  
33  
34  
35 preterm delivery  $< 37$  weeks and neonatal morbidity<sup>[19, 20]</sup>. As a result, neonatal  
36  
37  
38 outcomes models were further adjusted for GDM and PIH in addition to the  
39  
40  
41  
42  
43  
44  
45  
46  
47  
48  
49  
50  
51  
52  
53  
54  
55  
56  
57  
58  
59  
60  
61  
62  
63  
64  
65  
66  
67  
68  
69  
70  
71  
72  
73  
74  
75  
76  
77  
78  
79  
80  
81  
82  
83  
84  
85  
86  
87  
88  
89  
90  
91  
92  
93  
94  
95  
96  
97  
98  
99  
100  
101  
102  
103  
104  
105  
106  
107  
108  
109  
110  
111  
112  
113  
114  
115  
116  
117  
118  
119  
120  
121  
122  
123  
124  
125  
126  
127  
128  
129  
130  
131  
132  
133  
134  
135  
136  
137  
138  
139  
140  
141  
142  
143  
144  
145  
146  
147  
148  
149  
150  
151  
152  
153  
154  
155  
156  
157  
158  
159  
160  
161  
162  
163  
164  
165  
166  
167  
168  
169  
170  
171  
172  
173  
174  
175  
176  
177  
178  
179  
180  
181  
182  
183  
184  
185  
186  
187  
188  
189  
190  
191  
192  
193  
194  
195  
196  
197  
198  
199  
200  
201  
202  
203  
204  
205  
206  
207  
208  
209  
210  
211  
212  
213  
214  
215  
216  
217  
218  
219  
220  
221  
222  
223  
224  
225  
226  
227  
228  
229  
230  
231  
232  
233  
234  
235  
236  
237  
238  
239  
240  
241  
242  
243  
244  
245  
246  
247  
248  
249  
250  
251  
252  
253  
254  
255  
256  
257  
258  
259  
260  
261  
262  
263  
264  
265  
266  
267  
268  
269  
270  
271  
272  
273  
274  
275  
276  
277  
278  
279  
280  
281  
282  
283  
284  
285  
286  
287  
288  
289  
290  
291  
292  
293  
294  
295  
296  
297  
298  
299  
300  
301  
302  
303  
304  
305  
306  
307  
308  
309  
310  
311  
312  
313  
314  
315  
316  
317  
318  
319  
320  
321  
322  
323  
324  
325  
326  
327  
328  
329  
330  
331  
332  
333  
334  
335  
336  
337  
338  
339  
340  
341  
342  
343  
344  
345  
346  
347  
348  
349  
350  
351  
352  
353  
354  
355  
356  
357  
358  
359  
360  
361  
362  
363  
364  
365  
366  
367  
368  
369  
370  
371  
372  
373  
374  
375  
376  
377  
378  
379  
380  
381  
382  
383  
384  
385  
386  
387  
388  
389  
390  
391  
392  
393  
394  
395  
396  
397  
398  
399  
400  
401  
402  
403  
404  
405  
406  
407  
408  
409  
410  
411  
412  
413  
414  
415  
416  
417  
418  
419  
420  
421  
422  
423  
424  
425  
426  
427  
428  
429  
430  
431  
432  
433  
434  
435  
436  
437  
438  
439  
440  
441  
442  
443  
444  
445  
446  
447  
448  
449  
450  
451  
452  
453  
454  
455  
456  
457  
458  
459  
460  
461  
462  
463  
464  
465  
466  
467  
468  
469  
470  
471  
472  
473  
474  
475  
476  
477  
478  
479  
480  
481  
482  
483  
484  
485  
486  
487  
488  
489  
490  
491  
492  
493  
494  
495  
496  
497  
498  
499  
500  
501  
502  
503  
504  
505  
506  
507  
508  
509  
510  
511  
512  
513  
514  
515  
516  
517  
518  
519  
520  
521  
522  
523  
524  
525  
526  
527  
528  
529  
530  
531  
532  
533  
534  
535  
536  
537  
538  
539  
540  
541  
542  
543  
544  
545  
546  
547  
548  
549  
550  
551  
552  
553  
554  
555  
556  
557  
558  
559  
560  
561  
562  
563  
564  
565  
566  
567  
568  
569  
570  
571  
572  
573  
574  
575  
576  
577  
578  
579  
580  
581  
582  
583  
584  
585  
586  
587  
588  
589  
590  
591  
592  
593  
594  
595  
596  
597  
598  
599  
600  
601  
602  
603  
604  
605  
606  
607  
608  
609  
610  
611  
612  
613  
614  
615  
616  
617  
618  
619  
620  
621  
622  
623  
624  
625  
626  
627  
628  
629  
630  
631  
632  
633  
634  
635  
636  
637  
638  
639  
640  
641  
642  
643  
644  
645  
646  
647  
648  
649  
650  
651  
652  
653  
654  
655  
656  
657  
658  
659  
660  
661  
662  
663  
664  
665  
666  
667  
668  
669  
670  
671  
672  
673  
674  
675  
676  
677  
678  
679  
680  
681  
682  
683  
684  
685  
686  
687  
688  
689  
690  
691  
692  
693  
694  
695  
696  
697  
698  
699  
700  
701  
702  
703  
704  
705  
706  
707  
708  
709  
710  
711  
712  
713  
714  
715  
716  
717  
718  
719  
720  
721  
722  
723  
724  
725  
726  
727  
728  
729  
730  
731  
732  
733  
734  
735  
736  
737  
738  
739  
740  
741  
742  
743  
744  
745  
746  
747  
748  
749  
750  
751  
752  
753  
754  
755  
756  
757  
758  
759  
760  
761  
762  
763  
764  
765  
766  
767  
768  
769  
770  
771  
772  
773  
774  
775  
776  
777  
778  
779  
780  
781  
782  
783  
784  
785  
786  
787  
788  
789  
790  
791  
792  
793  
794  
795  
796  
797  
798  
799  
800  
801  
802  
803  
804  
805  
806  
807  
808  
809  
810  
811  
812  
813  
814  
815  
816  
817  
818  
819  
820  
821  
822  
823  
824  
825  
826  
827  
828  
829  
830  
831  
832  
833  
834  
835  
836  
837  
838  
839  
840  
841  
842  
843  
844  
845  
846  
847  
848  
849  
850  
851  
852  
853  
854  
855  
856  
857  
858  
859  
860  
861  
862  
863  
864  
865  
866  
867  
868  
869  
870  
871  
872  
873  
874  
875  
876  
877  
878  
879  
880  
881  
882  
883  
884  
885  
886  
887  
888  
889  
890  
891  
892  
893  
894  
895  
896  
897  
898  
899  
900  
901  
902  
903  
904  
905  
906  
907  
908  
909  
910  
911  
912  
913  
914  
915  
916  
917  
918  
919  
920  
921  
922  
923  
924  
925  
926  
927  
928  
929  
930  
931  
932  
933  
934  
935  
936  
937  
938  
939  
940  
941  
942  
943  
944  
945  
946  
947  
948  
949  
950  
951  
952  
953  
954  
955  
956  
957  
958  
959  
960  
961  
962  
963  
964  
965  
966  
967  
968  
969  
970  
971  
972  
973  
974  
975  
976  
977  
978  
979  
980  
981  
982  
983  
984  
985  
986  
987  
988  
989  
990  
991  
992  
993  
994  
995  
996  
997  
998  
999  
1000

All analyses were performed using the Statistical Analysis System (SAS) for Windows,

1  
2  
3  
4 version 9.4 (SAS Institute, Cary, NC).  $P < 0.05$  was considered statistically significant.  
5  
6  
7

### 8 *Patient and public involvement*

9

10  
11  
12 No patients were involved in the design, or conduct, or reporting, or dissemination plans  
13  
14  
15  
16 of our research.  
17

## 18 **Results**

19

### 20 *Study population and characteristics*

21  
22  
23

24  
25  
26  
27  
28 A total of 2630 pregnant women met the study inclusion criteria (Figure 1). The  
29  
30  
31 characteristics of all pregnant women in the study by total GWG is shown in Table 1.  
32

33  
34  
35 Among them, 1605 women who gained average weight in late pregnancy (z-score -1 to  
36  
37  
38 +1) were analyzed for the association of GWG in early pregnancy with the outcomes  
39

40  
41  
42 (Table S1); while 1717 women who gained average weight in early pregnancy were  
43  
44  
45 analyzed for the association of GWG in late pregnancy with the outcomes (Table S2).  
46

47  
48  
49 It should be noticed that for the two analytic datasets, the reference group was the same  
50  
51  
52 group of women who had average GWG in both early and late pregnancy (n=1233).  
53

### 54 *Weight gain during early pregnancy*

55  
56  
57  
58  
59  
60

1  
2  
3  
4 The risks of maternal and neonatal outcomes for GWG in early pregnancy are presented  
5  
6  
7  
8 in Figure 2A and Table S3. Lower GWG was not significantly associated with  
9  
10  
11 pregnancy outcomes, compared with the average GWG. In contrast, the risks of GDM  
12  
13  
14 (aRR=1.66; 95% CI: 1.11-2.48), caesarean section (aRR=1.21; 95% CI: 1.05-1.39) and  
15  
16  
17 prolonged hospitalization (aRR=1.56; 95% CI: 1.03-2.38) were higher in the group  
18  
19  
20  
21 with GWG above average in early pregnancy. No significant interactions between  
22  
23  
24  
25  
26 GWG in early pregnancy and covariates were observed.  
27  
28

### 29 ***Weight gain during late pregnancy***

30  
31  
32  
33 Associations of GWG in late pregnancy with perinatal outcomes are presented in Figure  
34  
35  
36  
37 2B and Table S4. In contrast to early pregnancy, the risks for GDM and SGA decreased  
38  
39  
40 significantly with increased GWG in late pregnancy, whereas the risks for LGA and  
41  
42  
43 macrosomia increased. Weight gain above average was correlated with a higher risk for  
44  
45  
46  
47 caesarean section (aRR=1.24; 95% CI: 1.09-1.41) in late pregnancy. In addition, higher  
48  
49  
50  
51  
52  
53  
54  
55  
56  
57  
58  
59  
60  
61  
62  
63  
64  
65  
66  
67  
68  
69  
70  
71  
72  
73  
74  
75  
76  
77  
78  
79  
80  
81  
82  
83  
84  
85  
86  
87  
88  
89  
90  
91  
92  
93  
94  
95  
96  
97  
98  
99  
100  
101  
102  
103  
104  
105  
106  
107  
108  
109  
110  
111  
112  
113  
114  
115  
116  
117  
118  
119  
120  
121  
122  
123  
124  
125  
126  
127  
128  
129  
130  
131  
132  
133  
134  
135  
136  
137  
138  
139  
140  
141  
142  
143  
144  
145  
146  
147  
148  
149  
150  
151  
152  
153  
154  
155  
156  
157  
158  
159  
160  
161  
162  
163  
164  
165  
166  
167  
168  
169  
170  
171  
172  
173  
174  
175  
176  
177  
178  
179  
180  
181  
182  
183  
184  
185  
186  
187  
188  
189  
190  
191  
192  
193  
194  
195  
196  
197  
198  
199  
200  
201  
202  
203  
204  
205  
206  
207  
208  
209  
210  
211  
212  
213  
214  
215  
216  
217  
218  
219  
220  
221  
222  
223  
224  
225  
226  
227  
228  
229  
230  
231  
232  
233  
234  
235  
236  
237  
238  
239  
240  
241  
242  
243  
244  
245  
246  
247  
248  
249  
250  
251  
252  
253  
254  
255  
256  
257  
258  
259  
260  
261  
262  
263  
264  
265  
266  
267  
268  
269  
270  
271  
272  
273  
274  
275  
276  
277  
278  
279  
280  
281  
282  
283  
284  
285  
286  
287  
288  
289  
290  
291  
292  
293  
294  
295  
296  
297  
298  
299  
300  
301  
302  
303  
304  
305  
306  
307  
308  
309  
310  
311  
312  
313  
314  
315  
316  
317  
318  
319  
320  
321  
322  
323  
324  
325  
326  
327  
328  
329  
330  
331  
332  
333  
334  
335  
336  
337  
338  
339  
340  
341  
342  
343  
344  
345  
346  
347  
348  
349  
350  
351  
352  
353  
354  
355  
356  
357  
358  
359  
360  
361  
362  
363  
364  
365  
366  
367  
368  
369  
370  
371  
372  
373  
374  
375  
376  
377  
378  
379  
380  
381  
382  
383  
384  
385  
386  
387  
388  
389  
390  
391  
392  
393  
394  
395  
396  
397  
398  
399  
400  
401  
402  
403  
404  
405  
406  
407  
408  
409  
410  
411  
412  
413  
414  
415  
416  
417  
418  
419  
420  
421  
422  
423  
424  
425  
426  
427  
428  
429  
430  
431  
432  
433  
434  
435  
436  
437  
438  
439  
440  
441  
442  
443  
444  
445  
446  
447  
448  
449  
450  
451  
452  
453  
454  
455  
456  
457  
458  
459  
460  
461  
462  
463  
464  
465  
466  
467  
468  
469  
470  
471  
472  
473  
474  
475  
476  
477  
478  
479  
480  
481  
482  
483  
484  
485  
486  
487  
488  
489  
490  
491  
492  
493  
494  
495  
496  
497  
498  
499  
500  
501  
502  
503  
504  
505  
506  
507  
508  
509  
510  
511  
512  
513  
514  
515  
516  
517  
518  
519  
520  
521  
522  
523  
524  
525  
526  
527  
528  
529  
530  
531  
532  
533  
534  
535  
536  
537  
538  
539  
540  
541  
542  
543  
544  
545  
546  
547  
548  
549  
550  
551  
552  
553  
554  
555  
556  
557  
558  
559  
560  
561  
562  
563  
564  
565  
566  
567  
568  
569  
570  
571  
572  
573  
574  
575  
576  
577  
578  
579  
580  
581  
582  
583  
584  
585  
586  
587  
588  
589  
590  
591  
592  
593  
594  
595  
596  
597  
598  
599  
600  
601  
602  
603  
604  
605  
606  
607  
608  
609  
610  
611  
612  
613  
614  
615  
616  
617  
618  
619  
620  
621  
622  
623  
624  
625  
626  
627  
628  
629  
630  
631  
632  
633  
634  
635  
636  
637  
638  
639  
640  
641  
642  
643  
644  
645  
646  
647  
648  
649  
650  
651  
652  
653  
654  
655  
656  
657  
658  
659  
660  
661  
662  
663  
664  
665  
666  
667  
668  
669  
670  
671  
672  
673  
674  
675  
676  
677  
678  
679  
680  
681  
682  
683  
684  
685  
686  
687  
688  
689  
690  
691  
692  
693  
694  
695  
696  
697  
698  
699  
700  
701  
702  
703  
704  
705  
706  
707  
708  
709  
710  
711  
712  
713  
714  
715  
716  
717  
718  
719  
720  
721  
722  
723  
724  
725  
726  
727  
728  
729  
730  
731  
732  
733  
734  
735  
736  
737  
738  
739  
740  
741  
742  
743  
744  
745  
746  
747  
748  
749  
750  
751  
752  
753  
754  
755  
756  
757  
758  
759  
760  
761  
762  
763  
764  
765  
766  
767  
768  
769  
770  
771  
772  
773  
774  
775  
776  
777  
778  
779  
780  
781  
782  
783  
784  
785  
786  
787  
788  
789  
790  
791  
792  
793  
794  
795  
796  
797  
798  
799  
800  
801  
802  
803  
804  
805  
806  
807  
808  
809  
810  
811  
812  
813  
814  
815  
816  
817  
818  
819  
820  
821  
822  
823  
824  
825  
826  
827  
828  
829  
830  
831  
832  
833  
834  
835  
836  
837  
838  
839  
840  
841  
842  
843  
844  
845  
846  
847  
848  
849  
850  
851  
852  
853  
854  
855  
856  
857  
858  
859  
860  
861  
862  
863  
864  
865  
866  
867  
868  
869  
870  
871  
872  
873  
874  
875  
876  
877  
878  
879  
880  
881  
882  
883  
884  
885  
886  
887  
888  
889  
890  
891  
892  
893  
894  
895  
896  
897  
898  
899  
900  
901  
902  
903  
904  
905  
906  
907  
908  
909  
910  
911  
912  
913  
914  
915  
916  
917  
918  
919  
920  
921  
922  
923  
924  
925  
926  
927  
928  
929  
930  
931  
932  
933  
934  
935  
936  
937  
938  
939  
940  
941  
942  
943  
944  
945  
946  
947  
948  
949  
950  
951  
952  
953  
954  
955  
956  
957  
958  
959  
960  
961  
962  
963  
964  
965  
966  
967  
968  
969  
970  
971  
972  
973  
974  
975  
976  
977  
978  
979  
980  
981  
982  
983  
984  
985  
986  
987  
988  
989  
990  
991  
992  
993  
994  
995  
996  
997  
998  
999  
1000

Significant interactions were identified between GWG in late pregnancy and fetal sex.



1  
2  
3  
4 Figure 3 and Table S5 shows the associations of late pregnancy weight gain with  
5  
6  
7  
8 pregnancy outcomes stratified by fetal sex. The risks for LGA and caesarean section  
9  
10  
11 significantly increased in women with higher GWG in late pregnancy, but the risk of  
12  
13  
14 GDM increased with less GWG, regardless of fetal sex. However, higher risks of  
15  
16  
17 gestational hypertension (aRR=2.31; 95% CI: 1.08-4.95) was only observed in women  
18  
19  
20 bearing a female fetus with higher GWG. Conversely, higher GWG in late pregnancy  
21  
22 was associated with GDM (aRR=0.30; 95% CI: 0.10-0.96), neonatal  
23  
24  
25 hyperbilirubinemia (aRR=0.46; 95% CI: 0.24-0.89) and macrosomia (aRR=2.05; 95%  
26  
27  
28 CI: 1.27-3.31) for women bearing a boy, but not for women bearing a girl, indicating  
29  
30  
31 effect modifications by fetal sex. But when stratified by fetal sex, the lower risk of SGA  
32  
33  
34 with higher GWG was no longer observed.  
35  
36  
37  
38  
39  
40  
41  
42  
43

#### ***Total weight gain during pregnancy***

44  
45  
46  
47 Figure 2C and Table S6 show results for pregnancy outcomes by total GWG. The effect  
48  
49  
50 sizes of GWG in late pregnancy on pregnancy outcomes were almost identical with the  
51  
52  
53 effect sizes of total GWG. Similar to late pregnancy, the risks for LGA, macrosomia  
54  
55  
56 and gestational hypertension increased significantly with increased total GWG. Higher  
57  
58  
59  
60

1  
2  
3  
4 GWG was also linked with a higher risk for caesarean section (aRR=1.78; 95% CI:  
5  
6  
7  
8 1.14-2.76). Moreover, total GWG below the average was associated with higher risks  
9  
10  
11 of GDM (aRR=1.51; 95% CI: 1.15-1.98) and SGA (aRR=1.53; 95% CI: 1.01-2.32). No  
12  
13  
14  
15 significant interactions between total GWG and other covariates were identified.  
16  
17

## 18 **Discussion**

### 19 **Main Findings**

20  
21  
22  
23  
24  
25  
26  
27 In this study, we found different associations of gestational stage-specific weight gain  
28  
29  
30 with maternal and neonatal outcomes. Of those, independent of GWG in late pregnancy,  
31  
32  
33 higher GWG in early pregnancy was associated with higher risks of GDM, caesarean  
34  
35  
36 section, and neonatal prolonged hospitalization.  
37  
38  
39  
40

### 41 **Strengths and limitations**

42  
43  
44  
45  
46 There are strengths in our study. In the study, some improvements have been made  
47  
48  
49 when compared with other studies reported in the literature. First, the SBC database  
50  
51  
52 contains detailed clinical data including pre-pregnancy weight, weight measurements  
53  
54  
55 during pregnancy and pregnancy weight measurements before delivery. This made it  
56  
57  
58 possible to study GWG in both early and late pregnancy. In addition, it is difficult to  
59  
60

1  
2  
3  
4 disentangle the effects of GWG on adverse pregnancy outcomes from the effects of the  
5  
6  
7  
8 gestation duration, because GWG is highly correlated with the gestational duration.  
9

10  
11 However, the use of GWG z-scores in our study can overcome this limitation. This  
12  
13  
14  
15 method ensured that the weight gain of women who experience adverse pregnancy  
16  
17  
18 outcomes would be compared with the weight gain of women without adverse  
19  
20  
21  
22 outcomes at the same point in pregnancy<sup>[14, 21]</sup>.  
23  
24  
25

26 There are also limitations in our study. We only investigated the short-term perinatal  
27  
28  
29 outcomes. Recently, researchers have linked an individual's susceptibility to chronic  
30  
31  
32 disease such as cardio-metabolic disease and obesity in later life to events during the  
33  
34  
35 intrauterine phase of development<sup>[8, 22-23]</sup>. Further studies on long-term outcomes would  
36  
37  
38  
39 provide important evidence regarding the associations between chronic diseases and  
40  
41  
42  
43 events during the intrauterine phase.  
44  
45

## 46 **Interpretation**

47  
48  
49  
50 Associations between insufficient or excessive weight gain during the whole pregnancy  
51  
52  
53 and maternal and child health outcomes have been well described<sup>[1-2, 7]</sup>. A meta-analysis  
54  
55  
56  
57 of pooled 1309136 participant data from 23 cohort studies showed that women who  
58  
59  
60

1  
2  
3  
4 gained high weight were more likely to have LGA, caesarean section and macrosomia,  
5  
6  
7  
8 while women who gained less weight were at higher risk of SGA<sup>[1]</sup>. These findings are  
9  
10  
11 in line with the association of maternal weight gain with adverse pregnancy outcomes  
12  
13  
14  
15 in our study.  
16

17  
18 There is growing recognition that the impacts of gestational stage-specific weight gain  
19  
20  
21 on pregnancy outcomes may vary<sup>[8-9, 22, 24-25]</sup>. GWG in early pregnancy largely reflects  
22  
23  
24  
25 maternal fat deposition, whereas GWG thereafter is mainly attributed to maternal and  
26  
27  
28  
29 amniotic fluid expansion, and growth of the fetus, placenta and uterus<sup>[5]</sup>. In this study,  
30  
31  
32  
33 mothers with increased fat deposition during pregnancy may affect the adiposity of the  
34  
35  
36  
37 offspring by higher placental transfer of nutrients, such as glucose and free fatty acids,  
38  
39  
40  
41 which may lead to maternal pregnancy complications, such as GDM, and permanent  
42  
43  
44 fetal and childhood adaptations in appetite, energy metabolism and neuro-endocrine  
45  
46  
47 function <sup>[25-26]</sup>. Therefore, GWG in early pregnancy, prior to the development of  
48  
49  
50  
51 pregnancy outcomes, might be as or more important than GWG in late pregnancy with  
52  
53  
54  
55 respect to pregnancy outcomes<sup>[9, 14]</sup>. A study of 5908 Netherlands mother-offspring  
56  
57  
58  
59  
60 pairs reported that higher weight gain in early pregnancy was associated with an

1  
2  
3  
4 adverse cardio-metabolic profile in the offspring<sup>[8]</sup>. Similarly, a study of 5154 UK  
5  
6  
7  
8 mother-offspring pairs showed that GWG in the first 14 week tended to be  
9  
10  
11 incrementally associated with offspring BMI, waist circumference and fat mass in  
12  
13  
14 children at age 9 years, but after 14 week of gestation, only high levels of GWG were  
15  
16  
17 associated with offspring's adiposity measures, highlighting the importance of the  
18  
19  
20  
21  
22 timing of weight gain in pregnancy<sup>[24]</sup>.  
23  
24

25  
26 Studies to clarify the relationship between gestational stage-specific weight gain and  
27  
28  
29 adverse pregnancy outcomes have been sporadic. A study of Korean pregnant women  
30  
31  
32 found that GWG velocity at early pregnancy was significantly associated with GDM,  
33  
34  
35 gestational hypertension, cesarean section, LGA, and macrosomia<sup>[12]</sup>. However, the  
36  
37  
38  
39 analyses have not accounted for the effects of weight gain in other periods of pregnancy.  
40  
41  
42

43  
44 In contrast, our analyses for early/late pregnancy GWG were restricted to women  
45  
46  
47 whose GWG z-scores in other pregnancy stage were normal, and thus the observed  
48  
49  
50 associations are independent of GWG in different periods. Our data from a large  
51  
52  
53 population-based Chinese cohort in Shanghai showed that higher, but not lower,  
54  
55  
56  
57 maternal GWG in early pregnancy was associated with increased risks of adverse  
58  
59  
60

1  
2  
3  
4 pregnancy outcomes, including GDM, caesarean section and prolonged hospitalization.  
5  
6  
7

8 In late pregnancy, low weight gain was associated with GDM as well as SGA, and high  
9  
10  
11 weight gain was associated with caesarean section, LGA and macrosomia.  
12  
13

14  
15 High GWG in early pregnancy has been associated with an increased risk of GDM,  
16  
17  
18 while there are some inconsistent data concerning the associations of GWG in second  
19  
20  
21 and third trimester or the whole pregnancy with GDM<sup>[11, 27-29]</sup>. Our study presents  
22  
23  
24 results which are in consistent with results produced by other studies <sup>[12, 27, 30]</sup> indicating  
25  
26  
27 that higher GWG in early pregnancy may increase the risk of developing GDM, but  
28  
29  
30 higher GWG in late pregnancy shows a reversed association. The discrepancy might be  
31  
32  
33 due to that women diagnosed with GDM might have undergone weight control  
34  
35  
36 interventions such as prescribed diet and physical exercise after the GDM diagnosis.  
37  
38  
39  
40  
41  
42  
43 Avoiding high weight gain in early pregnancy may prevent GDM, and health  
44  
45  
46 professionals who assist prenatal care might consider preemptive actions in high-risk  
47  
48  
49  
50 pregnant women.  
51

52  
53  
54 The risk of gestational hypertension increases significantly with higher maternal total  
55  
56  
57 GWG. A study of 29861 women from 25 hospitals in America showed that early weight  
58  
59  
60

1  
2  
3  
4 gain over the 2009 IOM recommendation were shown to be associated with the  
5  
6  
7  
8 development of gestational hypertension<sup>[31]</sup>. In a study of 101259 women with chronic  
9  
10  
11 hypertension, women who gained the amount of weight above the GWG range  
12  
13  
14 recommended by IOM guidelines were at increased risks of eclampsia<sup>[32]</sup>. Given the  
15  
16  
17 known vascular permeability and decreased plasma oncotic pressure that accompanies  
18  
19  
20 preeclampsia and its association with rapid weight gain<sup>[33]</sup>, excessive GWG may be a  
21  
22  
23 cause of hypertensive disease of pregnancy.  
24  
25  
26

27  
28  
29 Total GWG on average (-1 to +1) in our study were  $15.2 \pm 2.3$  kg for women with pre-  
30  
31  
32 pregnancy BMI less than 18.5 (underweight) and  $15.0 \pm 2.5$  kg for those who with pre-  
33  
34  
35 pregnancy BMI of 18.5 to 24.9 (normal weight), which corresponded to the 2009 IOM  
36  
37  
38 recommendations. Specifically, the 2009 IOM recommendations suggested GWG of  
39  
40  
41  
42  
43 12.5 to 18 kg for underweight women and 11.5 to 16 kg for normal weight women<sup>[5]</sup>.  
44  
45

46  
47 However, due to the sporadic number of obese women, we analyzed them together with  
48  
49  
50 overweight women. Total GWG on average were  $12.3 \pm 3.7$  kg for women with pre-  
51  
52  
53 pregnancy BMI greater than 25.0 (overweight and obese) in our study, which in general  
54  
55  
56  
57 was higher than the 2009 IOM recommended GWG range with 7 to 11.5 kg for  
58  
59  
60

1  
2  
3  
4 overweight and 5 to 9 kg for obese<sup>[5]</sup>. The most important reason for this difference is  
5  
6  
7  
8 that the IOM recommendation was derived largely from data collected among white  
9  
10  
11 women and may not well represent Chinese Population<sup>[34]</sup>. Therefore, we plan to  
12  
13  
14  
15 establish GWG standards that can be applied to Chinese population.  
16  
17

18 Our data suggest effect modification by fetal sex in the association of GWG in late  
19  
20  
21 pregnancy with birth outcomes. Recent studies suggest that fetus sex may affect  
22  
23  
24 pregnancy outcomes<sup>[35-36]</sup>. Although not very clear, how fetal sex may influence these  
25  
26  
27 outcomes may be explained by several factors. The placenta is an active endocrine  
28  
29  
30 organ, a sex-specific maternal-placental-fetal interaction may be involved<sup>[24]</sup>. Animal  
31  
32  
33 studies suggest that maternal baseline BMI and GWG are associated with the hormonal  
34  
35  
36 milieu, including insulin resistance<sup>[37]</sup>. In agreement with this concept, a growing body  
37  
38  
39 of evidence link early pregnancy GWG with cord blood hormones that may affect fetal  
40  
41  
42 growth and development<sup>[38]</sup>. Previous studies reported fetal sex differences in maternal  
43  
44  
45 first trimester hormones concentrations<sup>[15, 35, 39]</sup>. The resultant intrauterine environment  
46  
47  
48 may affect fetal development.  
49  
50  
51  
52  
53  
54

55  
56  
57 Our findings may have clinical implications. First, from early pregnancy onwards,  
58  
59  
60



1  
2  
3  
4 GWG may affect subsequent maternal and neonatal outcomes. Second, although  
5  
6  
7  
8 interventions to limit GWG in late pregnancy are effective, the benefits might be  
9  
10  
11 modest at best. To mitigate the harms of excessive weight gain, addressing the  
12  
13  
14 importance of gaining the appropriate amount of weight in both early and late  
15  
16  
17 pregnancy should be integrated into routine prenatal care<sup>[1, 7, 40]</sup>.  
18  
19  
20  
21

## 22 **Conclusion**

23  
24  
25  
26 The GWG associations with adverse pregnancy outcomes differ at early and late  
27  
28  
29 pregnancy, and there may be effect modification by fetal sex in the association of GWG  
30  
31  
32 in late pregnancy with some pregnancy outcomes. Weight gain management should be  
33  
34  
35 integrated into the routine prenatal care to decrease the risks of adverse pregnancy  
36  
37  
38 outcomes.  
39  
40  
41  
42

43  
44 **Acknowledgement** We thank the study participants for permitting us to use their  
45  
46  
47 personal data.  
48  
49

50  
51 **Contributors** YW and SW participated in interpretation of data and involved in  
52  
53  
54 drafting the manuscript. SG, ZM and LD analyzed the data and critically revised the  
55  
56  
57 manuscript. ZL, JZ and XH made substantial contributions to conception and design,  
58  
59  
60

1  
2  
3  
4 interpreted the data, and critically revised the manuscript. All authors read and  
5  
6  
7  
8 approved the final manuscript.  
9

10  
11 **Funding** This research was supported by a research grant (81873816) from the  
12  
13  
14  
15 National Natural Science Foundation of China.  
16

17  
18 **Competing interests** None declared. Completed disclosure of interests form  
19  
20  
21  
22 available to view online as supporting information.  
23  
24

25  
26 **Patient consent for publication** Not required.  
27

28  
29 **Ethics approval** This study was approved by Xinhua Hospital Research Ethics  
30  
31  
32  
33 Committee, Shanghai Jiao Tong University School of Medicine (reference number:  
34  
35  
36 XHEC-F-NSFC-2018-122).  
37  
38

39  
40 **Provenance and peer review** Not commissioned; externally peer reviewed.  
41

42  
43 **Open access** This is an open access article distributed in accordance with the  
44  
45  
46 Creative Commons Attribution Non Commercial (CC BY-NC 4.0) license, which  
47  
48  
49  
50 permits others to distribute, remix, adapt, build upon this work non-commercially, and  
51  
52  
53  
54 license their derivative works on different terms, provided the original work is properly  
55  
56  
57  
58 cited, appropriate credit is given, any changes made indicated, and the use is non-  
59  
60

commercial. See: <http://creativecommons.org/licenses/by-nc/4.0/>.

**Data sharing statement** The data will be available upon request to the corresponding authors.

## ORCID iD

X Hua <https://orcid.org/0000-0003-1098-5010>

## References

1. Goldstein R.F., Abell S.K., Ranasinha S., Misso M., Boyle J.A., Black M.H., et al. Association of Gestational Weight Gain With Maternal and Infant Outcomes: A Systematic Review and Meta-analysis. *Jama* 2017; 317: 2207.
2. Ismail L.C., Bishop D.C., Pang R., Ohuma E.O., Kac G., Abrams B., et al. Gestational weight gain standards based on women enrolled in the Fetal Growth Longitudinal Study of the INTERGROWTH-21st Project: a prospective longitudinal cohort study. *Bmj British Medical Journal* 2016; 352: i555.
3. Shulman R., Kottke M. Impact of maternal knowledge of recommended weight gain in pregnancy on gestational weight gain. *American Journal of Obstetrics & Gynecology* 2016; 214: 754.e751-754.e757.
4. Krukowski R.A., West D.S., Dicarolo M., Cleves M.A., Saylor M.E., Andres A. Association of Gestational Weight Gain Expectations and Advice on Actual Weight Gain. *Obstetrics & Gynecology* 2016; 129: 76.
5. Institute of Medicine (US), National Research Council (US) Committee to Reexamine IOM Pregnancy Weight Guidelines. In: Rasmussen KM, Yaktine AL, editors. *Weight Gain During Pregnancy*. Washington (DC): National Academies Press. 2009.
6. Flegal K.M., Kruszon-Moran D., Carroll M.D., Fryar C.D., Ogden C.L. Trends in Obesity Among Adults in the United States, 2005 to 2014. *JAMA* 2016; 315: 2284-2291.
7. Caughey A.B. Gestational Weight Gain and Outcomes for Mothers and Infants. *JAMA*

2017; 317: 2175-2176.

8. Gaillard R., Steegers E.A., Franco O.H., Hofman A., Jaddoe V.W. Maternal weight gain in different periods of pregnancy and childhood cardio-metabolic outcomes. The Generation R Study. *Int J Obes (Lond)* 2015; 39: 677-685.

9. Retnakaran R., Wen S.W., Tan H., Zhou S., Ye C., Shen M., et al. Association of Timing of Weight Gain in Pregnancy With Infant Birth Weight. *JAMA Pediatr* 2018; 172: 136-142.

10. Sommer C., Morkrid K., Jenum A.K., Sletner L., Mosdol A., Birkeland K.I. Weight gain, total fat gain and regional fat gain during pregnancy and the association with gestational diabetes: a population-based cohort study. *Int J Obes (Lond)* 2014; 38: 76-81.

11. Baci Y., Ustuner I., Keskin H.L., Ersoy R., Avsar A.F. Effect of maternal obesity and weight gain on gestational diabetes mellitus. *Gynecol Endocrinol* 2013; 29: 133-136.

12. Cho E.H., Hur J., Lee K.J. Early Gestational Weight Gain Rate and Adverse Pregnancy Outcomes in Korean Women. *Plos One* 2015; 10: e0140376.

13. Zhang J., Tian Y., Wang W., Ouyang F., Xu J., Yu X., et al. Cohort profile: the Shanghai Birth Cohort. *International Journal of Epidemiology* 2019; 48: 21-21g.

14. Johansson K., Hutcheon J.A., Bodnar L.M., Cnattingius S., Stephansson O. Pregnancy weight gain by gestational age and stillbirth: a population-based cohort study. *Bjog* 2017; 125.

15. Collares F.M., Korevaar T.I.M., Hofman A., Steegers E.A.P., Peeters R.P., Jaddoe V.W.V., et al. Maternal thyroid function, prepregnancy obesity and gestational weight gain-The Generation R Study: A prospective cohort study. *Clin Endocrinol (Oxf)* 2017; 87: 799-806.

16. Organization W.H. Obesity: preventing and managing the global epidemic. Report of a WHO consultation. 2000.

17. Berggren E.K., Groh-Wargo S., Presley L., Mouzon H.D., Catalano P.M. Maternal fat, but not lean, mass is increased among overweight/obesewomen with excess gestational weight gain. *American Journal of Obstetrics & Gynecology* 2016; 214: 745.e741-745.e745.

18. Zhu L., Zhang R., Zhang S., Shi W., Yan W., Wang X., et al. Chinese neonatal birth weight curve for different gestational age. *Chin J Pediatr* 2015; 53.

19. Yee L., Caughey A., Cheng Y. Association between gestational weight gain and perinatal outcomes in women with chronic hypertension. *Am J Obstet Gynecol* 2017; 09; 217 (3).

20. Waters T.P., Dyer A.R., Scholtens D.M., Dooley S.L., Herer E., Lowe L.P., et al. Maternal and Neonatal Morbidity for Women Who Would Be Added to the Diagnosis of GDM Using IADPSG Criteria: A Secondary Analysis of the Hyperglycemia and Adverse Pregnancy Outcome Study. *Diabetes Care* 2016; 2204-2210.

- 1  
2  
3  
4 21. Hutcheon J.A., Bodnar L.M., Joseph K.S., Abrams B., Simhan H.N., Platt R.W. The bias  
5 in current measures of gestational weight gain. *Paediatric and Perinatal Epidemiology* 2012;  
6 26: 109-116.  
7  
8  
9 22. Laitinen J., Jaaskelainen A., Hartikainen A.L., Sovio U., Vaarasmaki M., Pouta A., et al.  
10 Maternal weight gain during the first half of pregnancy and offspring obesity at 16 years: a  
11 prospective cohort study. *BJOG* 2012; 119: 716-723.  
12  
13 23. Margerison-Zilko C.E., Shrimali B.P., Eskenazi B., Lahiff M., Lindquist A.R., Abrams B.F.  
14 Trimester of Maternal Gestational Weight Gain and Offspring Body Weight at Birth and Age  
15 Five. *Maternal & Child Health Journal* 2012; 16: 1215-1223.  
16  
17 24. Fraser A., Tilling K., Macdonald-Wallis C., Sattar N., Brion M.-J., Benfield L., et al.  
18 Association of Maternal Weight Gain in Pregnancy With Offspring Obesity and Metabolic and  
19 Vascular Traits in Childhood. *Circulation* 2010; 121: 2557-2564.  
20  
21 25. Lawlor D.A., Paul L., Abigail F., Niklas L.N.M. Does maternal weight gain in pregnancy  
22 have long-term effects on offspring adiposity? A sibling study in a prospective cohort of  
23 146,894 men from 136,050 families. *American Journal of Clinical Nutrition* 2011; 94: 142.  
24  
25 26. Starling A.P., Brinton J.T., Glueck D.H., Shapiro A.L., Harrod C.S., Lynch A.M., et al.  
26 Associations of maternal BMI and gestational weight gain with neonatal adiposity in the  
27 Healthy Start study. *Am J Clin Nutr* 2015; 101: 302-309.  
28  
29 27. MacDonald S.C., Bodnar L.M., Himes K.P., Hutcheon J.A. Patterns of Gestational Weight  
30 Gain in Early Pregnancy and Risk of Gestational Diabetes Mellitus. *Epidemiology* 2017; 28:  
31 419-427.  
32  
33 28. Tomedi L.E., Simhan H.N., Chang C.C., McTigue K.M., Bodnar L.M. Gestational weight  
34 gain, early pregnancy maternal adiposity distribution, and maternal hyperglycemia. *Matern  
35 Child Health J* 2014; 18: 1265-1270.  
36  
37 29. Dai Z.Y., Liu D., Li R., Wang Y., Zhang J., Liu J., et al. Association between gestational  
38 weight gain per trimester/total gestational weight gain and gestational diabetes mellitus.  
39 *Zhonghua Liu Xing Bing Xue Za Zhi* 2016; 37: 1336-1340.  
40  
41 30. Moore Simas T.A., Waring M.E., Callaghan K., Leung K., Ward Harvey M., Buabud A.,  
42 et al. Weight gain in early pregnancy and risk of gestational diabetes mellitus among Latinas.  
43 *Diabetes Metab* 2019; 45: 26-31.  
44  
45 31. Kominiarek M.A., Saade G., Mele L., Bailit J., Reddy U.M., Wapner R.J., et al.  
46 Association Between Gestational Weight Gain and Perinatal Outcomes. *Obstet Gynecol* 2018;  
47 132: 875-881.  
48  
49  
50  
51  
52  
53  
54  
55  
56  
57  
58  
59  
60

- 1  
2  
3  
4 32. Yee L.M., Caughey A.B., Cheng Y.W. Association between gestational weight gain and  
5 perinatal outcomes in women with chronic hypertension. *Am J Obstet Gynecol* 2017; 217: 348  
6 e341-348 e349.  
7  
8  
9 33. American College of Obstetricians and Gynecologists; Task Force on Hypertension in  
10 Pregnancy. Hypertension in pregnancy. Report of the American College of Obstetricians and  
11 Gynecologists' Task Force on Hypertension in Pregnancy. *Obstet Gynecol* 2013; 122:1122–  
12 31.  
13  
14  
15 34. Jiang X., Liu M., Song Y., Mou J., Zhou M., Ma Z., et al. The Institute of Medicine  
16 recommendation for gestational weight gain is probably not optimal among non-American  
17 pregnant women: a retrospective study from China. *The Journal of Maternal-Fetal &*  
18 *Neonatal Medicine* 2019, 32(8): 1353-1358.  
19  
20  
21  
22 35. Broere-Brown Z.A., Schalekamp-Timmermans S., Hofman A., Jaddoe V.W.V., Steegers  
23 E.A.P. Fetal sex dependency of maternal vascular adaptation to pregnancy: a prospective  
24 population-based cohort study. *BJOG: An International Journal of Obstetrics & Gynaecology*  
25 2015; 123: 1087-1095.  
26  
27  
28  
29 36. Torricelli M., Voltolini C., Conti N., Bocchi C., Severi F.M., Petraglia F. Weight gain  
30 regardless of pre-pregnancy BMI and influence of fetal gender in response to labor induction  
31 in postdate pregnancy. *J Matern Fetal Neonatal Med* 2013; 26: 1016-1019.  
32  
33  
34 37. Nicholas L.M., Rattanatray L., MacLaughlin S.M., Ozanne S.E., Kleemann D.O., Walker  
35 S.K., et al. Differential effects of maternal obesity and weight loss in the periconceptional  
36 period on the epigenetic regulation of hepatic insulin-signaling pathways in the offspring. *The*  
37 *FASEB Journal* 2013; 27: 3786-3796.  
38  
39  
40 38. Rifas-Shiman S.L., Fleisch A., Hivert M.F., Mantzoros C., Gillman M.W., Oken E. First  
41 and second trimester gestational weight gains are most strongly associated with cord blood  
42 levels of hormones at delivery important for glycemic control and somatic growth. *Metabolism*  
43 2017; 69: 112-119.  
44  
45  
46 39. Arentson-Lantz E.J., Buhman K.K., Ajuwon K., Donkin S.S. Excess pregnancy weight  
47 gain leads to early indications of metabolic syndrome in a swine model of fetal programming.  
48 *Nutr Res* 2014; 34: 241-249.  
49  
50  
51 40. Teede H., Harrison C., Lombard C., Boyle J., East C., Brown W. Case for Action: proposal,  
52 obesity prevention through preventing excess weight gain during pregnancy and postpartum.  
53 2015.  
54  
55  
56  
57  
58  
59  
60

**Table 1. Characteristics of pregnant women in the study cohort (n=2630)**

| Characteristic                                                   | Total       | Total gestational weight gain |                     |                  | P       |
|------------------------------------------------------------------|-------------|-------------------------------|---------------------|------------------|---------|
|                                                                  |             | Below<br>(n=392)              | Average<br>(n=1842) | Above<br>(n=396) |         |
| Maternal age (year), mean ± SD                                   | 29.4 ± 3.6  | 29.9 ± 3.8                    | 29.4 ± 3.5          | 28.5 ± 3.6       | <0.0001 |
| Maternal age ≥35 years, n (%)                                    | 241 (9.2)   | 51 (13)                       | 169 (9.2)           | 21 (5.3)         | 0.0002  |
| Nulliparous, n (%)                                               | 2216 (84.3) | 325 (82.9)                    | 1532 (83.2)         | 359 (90.7)       | 0.0027  |
| Education, university degree and above, n (%)                    | 2404 (91.5) | 362 (92.6)                    | 1702 (92.5)         | 340 (85.7)       | 0.0007  |
| ART, n (%)                                                       | 55 (2.1)    | 9 (2.3)                       | 37 (2)              | 9 (2.3)          | 0.9834  |
| Tobacco smoking, n (%)                                           | 72 (2.7)    | 7 (1.8)                       | 41 (2.2)            | 24 (6.1)         | <0.0001 |
| Alcohol use, n (%)                                               | 338 (12.9)  | 52 (13.3)                     | 240 (13)            | 46 (11.6)        | 0.7221  |
| Pre-pregnancy BMI (kg/m <sup>2</sup> ), mean ± SD                | 21.3 ± 3.0  | 21.7 ± 3.1                    | 21.2 ± 3.0          | 21.5 ± 2.9       | 0.0139  |
| Pre-pregnancy BMI categories, n (%)                              |             |                               |                     |                  |         |
| Underweight (< 18.5 kg/m <sup>2</sup> )                          | 396 (15.1)  | 54 (13.8)                     | 292 (15.9)          | 50 (12.6)        | 0.7530  |
| Normal weight (18.5–24.9 kg/m <sup>2</sup> )                     | 1980 (75.3) | 298 (76)                      | 1372 (74.5)         | 310 (78.3)       |         |
| Overweight and obese (≥ 25 kg/m <sup>2</sup> )                   | 254 (9.7)   | 40 (10.2)                     | 178 (9.7)           | 36 (9.1)         |         |
| Gestational age at the first prenatal visit (week), median (IQR) | 15 (3)      | 14 (3)                        | 15 (3)              | 15 (3)           | 0.1986  |
| GWG in early pregnancy by BMI categories (kg), mean ± SD         |             |                               |                     |                  |         |
| All women                                                        | 2.2 ± 2.9   | -0.2 ± 2.8                    | 2.1 ± 2.2           | 4.9 ± 3.2        | <0.0001 |
| Underweight (< 18.5 kg/m <sup>2</sup> )                          | 2.5 ± 2.4   | 0.9 ± 1.9                     | 2.4 ± 2.0           | 4.8 ± 3.0        | <0.0001 |
| Normal weight (18.5–24.9 kg/m <sup>2</sup> )                     | 2.3±2.8     | 0.0 ± 2.8                     | 2.2 ± 2.2           | 4.9 ± 3.1        | <0.0001 |
| Overweight and obese (≥ 25 kg/m <sup>2</sup> )                   | 1.4±3.6     | -2.2 ± 3.3                    | 1.5 ± 2.6           | 4.7 ± 4.4        | <0.0001 |

1  
2  
3 GWG in late pregnancy by BMI categories (kg), mean  $\pm$  SD

|                                                        |                |               |                |                |         |
|--------------------------------------------------------|----------------|---------------|----------------|----------------|---------|
| 4 All women                                            | 13.0 $\pm$ 3.5 | 8.2 $\pm$ 3.0 | 12.6 $\pm$ 2.9 | 17.8 $\pm$ 3.6 | <0.0001 |
| 5 Underweight (< 18.5 kg/m <sup>2</sup> )              | 13.0 $\pm$ 3.5 | 8.9 $\pm$ 1.9 | 12.8 $\pm$ 2.5 | 18.2 $\pm$ 3.8 | <0.0001 |
| 6 Normal weight (18.5–24.9 kg/m <sup>2</sup> )         | 12.9 $\pm$ 4.0 | 8.4 $\pm$ 3.0 | 12.8 $\pm$ 2.8 | 17.8 $\pm$ 3.6 | <0.0001 |
| 7 Overweight and obese ( $\geq$ 25 kg/m <sup>2</sup> ) | 11.0 $\pm$ 4.9 | 5.8 $\pm$ 3.3 | 10.8 $\pm$ 3.8 | 17.4 $\pm$ 3.8 | <0.0001 |

8  
9  
10  
11 GWG in whole pregnancy by BMI categories (kg), mean  $\pm$  SD

|                                                         |                |               |                |                |         |
|---------------------------------------------------------|----------------|---------------|----------------|----------------|---------|
| 12 All women                                            | 15.0 $\pm$ 4.9 | 8.1 $\pm$ 2.6 | 14.8 $\pm$ 2.7 | 22.7 $\pm$ 2.9 | <0.0001 |
| 13 Underweight (< 18.5 kg/m <sup>2</sup> )              | 15.4 $\pm$ 4.2 | 9.7 $\pm$ 1.6 | 15.2 $\pm$ 2.3 | 23.1 $\pm$ 3.0 | <0.0001 |
| 14 Normal weight (18.5–24.9 kg/m <sup>2</sup> )         | 15.2 $\pm$ 4.7 | 8.4 $\pm$ 2.1 | 15.0 $\pm$ 2.5 | 22.7 $\pm$ 2.8 | <0.0001 |
| 15 Overweight and obese ( $\geq$ 25 kg/m <sup>2</sup> ) | 12.3 $\pm$ 6.1 | 3.7 $\pm$ 2.4 | 12.3 $\pm$ 3.7 | 22.0 $\pm$ 3.6 | <0.0001 |

16  
17  
18  
19 Gestational age at delivery (week), median (IQR)

|        |        |        |        |        |
|--------|--------|--------|--------|--------|
| 39 (2) | 39 (2) | 39 (2) | 39 (2) | 0.0793 |
|--------|--------|--------|--------|--------|

20 Birth weight (g), mean  $\pm$  SD

|                |                |                |                |         |
|----------------|----------------|----------------|----------------|---------|
| 3376 $\pm$ 450 | 3238 $\pm$ 422 | 3370 $\pm$ 438 | 3540 $\pm$ 480 | <0.0001 |
|----------------|----------------|----------------|----------------|---------|

21  
22  
23  
24 Male infant, n (%)

|             |            |          |            |        |
|-------------|------------|----------|------------|--------|
| 1334 (51.4) | 194 (50.4) | 945 (52) | 195 (49.5) | 0.7951 |
|-------------|------------|----------|------------|--------|

25  
26  
27  
28  
29  
30  
31  
32  
33  
34  
35  
36  
37  
38  
39  
40  
41  
42  
43  
44  
45  
46

---

ART: assisted reproductive technology; BMI: body mass index; GWG: gestational weight gain; IQR: interquartile range; SD: standard deviation.



## Figure Legend

### Figure 1. Study flow chart.

### Figure 2. Associations of gestational weight gain with pregnancy outcomes.

(A) Associations of early gestational weight gain ( $\leq 17$  week) with pregnancy outcomes. (B) Associations of late gestational weight gain ( $> 17$  week) with pregnancy outcomes. (C) Associations of total gestational weight gain with pregnancy outcomes.

NICU: neonatal intensive care unit; LGA: large for gestational age; SGA: small for gestational age; GDM: gestational diabetes mellitus; PIH: pregnancy-induced hypertension; GWG: gestational weight gain; ARR: adjusted relative risk. \* $< 0.05$

Average GWG group as the reference.

<sup>a1</sup> The analysis was adjusted for maternal age, parity, pre-pregnancy BMI and length of gestation.

<sup>b1</sup> The analysis was adjusted for parity, pre-pregnancy BMI, fetal sex, GDM and PIH.

<sup>c1</sup> The analysis was adjusted for pre-pregnancy BMI, fetal sex, alcohol/tobacco use, length of gestation, GDM and PIH.

<sup>d1</sup> The analysis was adjusted for maternal age, alcohol/tobacco use, GDM and PIH.

<sup>a2</sup> The analysis was adjusted for maternal age and pre-pregnancy BMI.;

<sup>b2</sup> The analysis was adjusted for parity, pre-pregnancy BMI, fetal sex and length of gestation.

<sup>c2</sup> The analysis was adjusted for maternal age, parity, pre-pregnancy BM, GDM and PIH.

<sup>d2</sup> The analysis was adjusted for parity, pre-pregnancy BMI, fetal sex, GDM and PIH.

<sup>e2</sup> The analysis was adjusted for parity, pre-pregnancy BMI, alcohol/tobacco use, length of gestation, GDM and PIH.

<sup>f2</sup> The analysis was adjusted for maternal age, alcohol/tobacco use and length of gestation.

<sup>a3</sup> The analysis was adjusted for maternal age, parity, pre-pregnancy BMI, alcohol/tobacco use and fetal sex.

<sup>b3</sup> The analysis was adjusted for parity, pre-pregnancy BMI and length of gestation.

<sup>c3</sup> The analysis was adjusted for parity, pre-pregnancy BMI, length of gestation, GDM and PIH.

<sup>d3</sup> The analysis was adjusted for maternal age, parity and length of gestation.

<sup>e3</sup> The analysis was adjusted for pre-pregnancy BMI, fetal sex, length of gestation, GDM and PIH.

1  
2  
3  
4 **Figure 3. Associations of late gestational weight gain (>17 week) with pregnancy**  
5  
6 **outcomes, stratified by fetal sex.**  
7

8  
9 NICU: neonatal intensive care unit; LGA: large for gestational age; SGA: small for gestational age; GDM:  
10 gestational diabetes mellitus; PIH: pregnancy-induced hypertension; GWG: gestational weight gain; ARR:  
11 adjusted relative risk.  
12

13  
14 \* $<0.05$   
15

16 Average GWG group as the reference.

17 <sup>a</sup> The analysis was adjusted for maternal age and pre-pregnancy BMI.

18  
19 <sup>b</sup> The analysis was adjusted for maternal age, parity, pre-pregnancy BMI, alcohol/tobacco use and length of  
20 gestation.  
21

22  
23 <sup>c</sup> The analysis was adjusted for maternal age, pre-pregnancy BMI, GDM and PIH.

24  
25 <sup>d</sup> The analysis was adjusted for parity, pre-pregnancy BMI, alcohol/tobacco use and length of gestation.

26  
27 <sup>e</sup> The analysis was adjusted for parity, alcohol/tobacco use, length of gestation, GDM and PIH.

28  
29 <sup>f</sup> The analysis was adjusted for parity, pre-pregnancy BMI, length of gestation, GDM and PIH.  
30  
31  
32  
33  
34  
35  
36  
37  
38  
39  
40  
41  
42  
43  
44  
45  
46  
47  
48  
49  
50  
51  
52  
53  
54  
55  
56  
57  
58  
59  
60

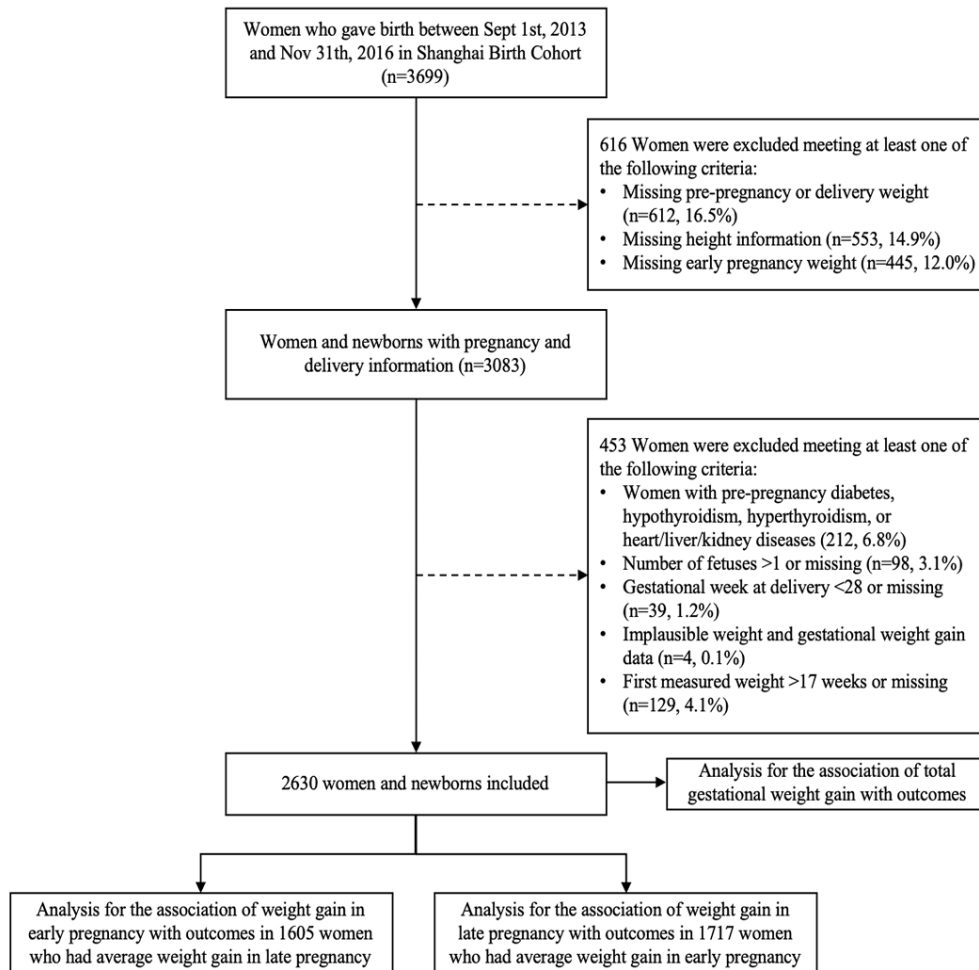

Figure 1. Study flow chart.



Figure 2. Associations of gestational weight gain with pregnancy outcomes. (A) Associations of early gestational weight gain ( $\leq 17$  week) with pregnancy outcomes. (B) Associations of late gestational weight gain ( $> 17$  week) with pregnancy outcomes. (C) Associations of total gestational weight gain with pregnancy outcomes. NICU: neonatal intensive care unit; LGA: large for gestational age; SGA: small for gestational age; GDM: gestational diabetes mellitus; PIH: pregnancy-induced hypertension; GWG: gestational weight gain; ARR: adjusted relative risk.  $* < 0.05$  Average GWG group as the reference. a1 The analysis was adjusted for maternal age, parity, pre-pregnancy BMI and length of gestation. b1 The analysis was adjusted for parity, pre-pregnancy BMI, fetal sex, GDM and PIH. c1 The analysis was adjusted for pre-pregnancy BMI, fetal sex, alcohol/tobacco use, length of gestation, GDM and PIH. d1 The analysis was adjusted for maternal age, alcohol/tobacco use, GDM and PIH. a2 The analysis was adjusted for maternal age and pre-pregnancy BMI.; b2 The analysis was adjusted for parity, pre-pregnancy BMI, fetal sex and length of gestation. c2 The analysis was adjusted for maternal age, parity, pre-pregnancy BM, GDM and PIH. d2 The analysis was adjusted for parity, pre-pregnancy BMI, fetal sex, GDM and PIH. e2 The analysis was adjusted for parity, pre-pregnancy BMI, alcohol/tobacco use, length of gestation, GDM and PIH. f2 The analysis was adjusted for maternal age, alcohol/tobacco use and length of gestation. a3 The analysis was adjusted for maternal age, parity, pre-pregnancy BMI, alcohol/tobacco use and fetal sex. b3 The analysis was adjusted for parity, pre-pregnancy BMI and length of gestation. c3 The analysis was adjusted for parity, pre-pregnancy BMI, length of gestation, GDM and PIH. d3 The analysis was adjusted for maternal age, parity and length of gestation. e3 The analysis was adjusted for pre-pregnancy BMI, fetal sex, length of gestation, GDM and PIH.



Figure 3. Associations of late gestational weight gain (>17 week) with pregnancy outcomes, stratified by fetal sex. NICU: neonatal intensive care unit; LGA: large for gestational age; SGA: small for gestational age; GDM: gestational diabetes mellitus; PIH: pregnancy-induced hypertension; GWG: gestational weight gain; ARR: adjusted relative risk. \* $<0.05$  Average GWG group as the reference. a The analysis was adjusted for maternal age and pre-pregnancy BMI. b The analysis was adjusted for maternal age, parity, pre-pregnancy BMI, alcohol/tobacco use and length of gestation. c The analysis was adjusted for maternal age, pre-pregnancy BMI, GDM and PIH. d The analysis was adjusted for parity, pre-pregnancy BMI, alcohol/tobacco use and length of gestation. e The analysis was adjusted for parity, alcohol/tobacco use, length of gestation, GDM and PIH. f The analysis was adjusted for parity, pre-pregnancy BMI, length of gestation, GDM and PIH.

**Table S1. Maternal characteristics in the study of gestational weight gain in early pregnancy ( $\leq 17$  week)**

| Characteristic                                                   | Below (n=186)  | Average (n=1233) | Above (n=186)  | <i>P</i> |
|------------------------------------------------------------------|----------------|------------------|----------------|----------|
| Maternal age (year), mean $\pm$ SD                               | 28.2 $\pm$ 3.4 | 29.4 $\pm$ 3.7   | 29.4 $\pm$ 3.5 | 0.0002   |
| Maternal age $\geq 35$ years, n (%)                              | 11 (5.9)       | 126 (10.2)       | 14 (7.5)       | 0.5946   |
| Nulliparous, n (%)                                               | 165 (88.7)     | 1011 (82)        | 155 (83.3)     | 0.1683   |
| Education, university degree and above, n (%)                    | 164 (88.1)     | 1138 (92.4)      | 162 (87.6)     | 0.8411   |
| ART, n (%)                                                       | 4 (2.2)        | 27 (2.2)         | 5 (2.7)        | 0.9110   |
| Tobacco smoking, n (%)                                           | 4 (2.2)        | 26 (2.1)         | 9 (4.8)        | 0.0924   |
| Alcohol use, n (%)                                               | 15 (8.1)       | 129 (10.5)       | 18 (9.37)      | 0.5876   |
| Pre-pregnancy BMI ( $\text{kg}/\text{m}^2$ ), mean $\pm$ SD      | 21.8 $\pm$ 3.1 | 21.2 $\pm$ 3.0   | 21.7 $\pm$ 3.1 | 0.0027   |
| Pre-pregnancy BMI categories, n (%)                              |                |                  |                |          |
| Underweight ( $< 18.5 \text{ kg}/\text{m}^2$ )                   | 28 (15.1)      | 193 (15.7)       | 28 (15.1)      |          |
| Normal weight ( $18.5\text{--}24.9 \text{ kg}/\text{m}^2$ )      | 134 (72)       | 929 (75.3)       | 133 (71.5)     | 0.9848   |
| Overweight and obese ( $\geq 25 \text{ kg}/\text{m}^2$ )         | 24 (12.9)      | 111 (9)          | 25 (13.4)      |          |
| Gestational age at the first prenatal visit (week), median (IQR) | 14 (3)         | 14 (3)           | 15 (3)         | 0.8298   |
| GWG in early pregnancy by BMI categories (kg), mean $\pm$ SD     |                |                  |                |          |
| All women                                                        | -2.5 $\pm$ 2.0 | 2.1 $\pm$ 1.5    | 6.7 $\pm$ 2.1  | <0.0001  |
| Underweight ( $< 18.5 \text{ kg}/\text{m}^2$ )                   | -0.6 $\pm$ 1.1 | 2.1 $\pm$ 1.2    | 6.4 $\pm$ 2.1  | <0.0001  |
| Normal weight ( $18.5\text{--}24.9 \text{ kg}/\text{m}^2$ )      | -2.5 $\pm$ 1.7 | 2.1 $\pm$ 1.5    | 7.0 $\pm$ 2.1  | <0.0001  |
| Overweight and obese ( $\geq 25 \text{ kg}/\text{m}^2$ )         | -4.7 $\pm$ 1.7 | 1.5 $\pm$ 1.8    | 5.7 $\pm$ 1.7  | <0.0001  |
| GWG in late pregnancy by BMI categories (kg), mean $\pm$ SD      |                |                  |                |          |
| All women                                                        | 12.5 $\pm$ 2.3 | 12.6 $\pm$ 2.3   | 12.3 $\pm$ 2.4 | 0.4854   |

1  
2  
3  
4  
5  
6  
7  
8  
9  
10  
11  
12  
13  
14  
15  
16  
17  
18  
19  
20  
21  
22  
23  
24  
25  
26  
27  
28  
29  
30  
31  
32  
33  
34  
35  
36  
37  
38  
39  
40  
41  
42  
43  
44  
45  
46

|                                                  |            |            |            |        |
|--------------------------------------------------|------------|------------|------------|--------|
| Underweight (< 18.5 kg/m <sup>2</sup> )          | 12.4 ± 1.9 | 12.7 ± 1.9 | 12.5 ± 1.8 | 0.6323 |
| Normal weight (18.5–24.9 kg/m <sup>2</sup> )     | 12.8 ± 2.2 | 12.7 ± 2.2 | 12.6 ± 2.1 | 0.8492 |
| Overweight and obese (≥ 25 kg/m <sup>2</sup> )   | 10.7 ± 2.2 | 11.1 ± 3.1 | 10.4 ± 3.3 | 0.5676 |
| Gestational age at delivery (week), median (IQR) | 39 (2)     | 39 (2)     | 39 (2)     | 0.9126 |
| Birth weight (g), mean ± SD                      | 3296 ± 435 | 3370 ± 446 | 3382 ± 515 | 0.0428 |
| Male infant, n (%)                               | 92 (50.3)  | 646 (53.2) | 102 (55.4) | 0.6091 |

ART: assisted reproductive technology; BMI: body mass index; GWG: gestational weight gain; IQR: interquartile range; SD: standard deviation.

For peer review only

**Table S2. Maternal characteristics in the study of gestational weight gain in late pregnancy (>17 week)**

| Characteristic                                                   | Below (n=236) | Average (n=1233) | Above (n=248) | <i>P</i> |
|------------------------------------------------------------------|---------------|------------------|---------------|----------|
| Maternal age (year), mean ± SD                                   | 30.4 ± 3.8    | 29.4 ± 3.7       | 27.9 ± 3.5    | <0.0001  |
| Maternal age ≥35 years, n (%)                                    | 37 (15.7)     | 126 (10.2)       | 10 (4)        | <0.0001  |
| Nulliparous, n (%)                                               | 183 (77.5)    | 1011 (82)        | 234 (94.4)    | <0.0001  |
| Education, university degree and above, n (%)                    | 222 (94.1)    | 1138 (92.4)      | 214 (86.3)    | 0.0017   |
| ART, n (%)                                                       | 7 (3)         | 27 (2.2)         | 6 (2.4)       | 0.7701   |
| Tobacco smoking, n (%)                                           | 4 (1.7)       | 26 (2.1)         | 12 (4.8)      | 0.0234   |
| Alcohol use, n (%)                                               | 20 (8.5)      | 129 (10.5)       | 20 (8.1)      | 0.3841   |
| Pre-pregnancy BMI (kg/m <sup>2</sup> ), mean ± SD                | 21.6 ± 3.1    | 21.2 ± 3.0       | 21.4 ± 3.1    | 0.0564   |
| Pre-pregnancy BMI categories, n (%)                              |               |                  |               |          |
| Underweight (< 18.5 kg/m <sup>2</sup> )                          | 29 (12.3)     | 193 (15.7)       | 37 (14.9)     |          |
| Normal weight (18.5–24.9 kg/m <sup>2</sup> )                     | 178 (75.4)    | 929 (75.3)       | 189 (76.2)    | 0.3711   |
| Overweight and obese (≥ 25 kg/m <sup>2</sup> )                   | 29 (12.3)     | 111 (9)          | 22 (8.9)      |          |
| Gestational age at the first prenatal visit (week), median (IQR) | 14 (3)        | 14 (3)           | 14 (3)        | 0.4231   |
| GWG in early pregnancy by BMI categories (kg), mean ± SD         |               |                  |               |          |
| All women                                                        | 2.1 ± 1.5     | 2.1 ± 1.5        | 2.3 ± 1.4     | 0.1943   |
| Underweight (< 18.5 kg/m <sup>2</sup> )                          | 2.7 ± 1.4     | 2.1 ± 1.2        | 2.8 ± 1.3     | 0.0009   |
| Normal weight (18.5–24.9 kg/m <sup>2</sup> )                     | 2.1 ± 1.5     | 2.1 ± 1.5        | 2.2 ± 1.5     | 0.7273   |
| Overweight and obese (≥ 25 kg/m <sup>2</sup> )                   | 1.5 ± 1.6     | 1.5 ± 1.8        | 2.1 ± 1.2     | 0.2109   |
| GWG in late pregnancy by BMI categories (kg), mean ± SD          |               |                  |               |          |
| All women                                                        | 7.0 ± 2.1     | 12.6 ± 2.3       | 19.1 ± 2.4    | <0.0001  |



1  
2  
3  
4  
5  
6  
7  
8  
9  
10  
11  
12  
13  
14  
15  
16  
17  
18  
19  
20  
21  
22  
23  
24  
25  
26  
27  
28  
29  
30  
31  
32  
33  
34  
35  
36  
37  
38  
39  
40  
41  
42  
43  
44  
45  
46

|                                                  |            |            |            |         |
|--------------------------------------------------|------------|------------|------------|---------|
| Underweight (< 18.5 kg/m <sup>2</sup> )          | 7.9 ± 1.2  | 12.7 ± 1.9 | 19.2 ± 2.6 | <0.0001 |
| Normal weight (18.5–24.9 kg/m <sup>2</sup> )     | 7.3 ± 1.9  | 12.7 ± 2.2 | 19.1 ± 2.2 | <0.0001 |
| Overweight and obese (≥ 25 kg/m <sup>2</sup> )   | 4.1 ± 1.9  | 11.1 ± 3.1 | 18.3 ± 3.2 | <0.0001 |
| Gestational age at delivery (week), median (IQR) | 39 (2)     | 39 (2)     | 39 (2)     | 0.0872  |
| Birth weight (g), mean ± SD                      | 3261 ± 397 | 3370 ± 446 | 3536 ± 461 | <0.0001 |
| Male infant, n (%)                               | 110 (47.8) | 646 (53.2) | 120 (49)   | 0.8381  |

ART: assisted reproductive technology; BMI: body mass index; GWG: gestational weight gain; IQR: interquartile range; SD: standard deviation.

For peer review only

**Table S3. Association of pregnancy outcomes by gestational weight gain in early pregnancy (≤17 week)**

| Outcomes                      | Below (n=186) |                   | Average (n=1233) |           | Above (n=186) |                    |
|-------------------------------|---------------|-------------------|------------------|-----------|---------------|--------------------|
|                               | n (%)         | aRR (95% CI)      | n (%)            | aRR       | n (%)         | aRR (95% CI)       |
| GDM                           | 18 (9.7)      | 1.19 (0.74, 1.91) | 97 (7.9)         | Reference | 25 (13.4)     | 1.66 (1.11, 2.48)* |
| PIH                           | 3 (1.6)       | 0.42 (0.13, 1.34) | 44 (3.6)         | Reference | 11 (5.9)      | 1.58 (0.83, 3.00)  |
| Caesarean section             | 71 (41)       | 0.87 (0.72, 1.04) | 548 (47.3)       | Reference | 101 (56.7)    | 1.21 (1.05, 1.39)* |
| Preterm birth                 | 9 (4.8)       | 1.17 (0.59, 2.33) | 54 (4.4)         | Reference | 11 (5.9)      | 1.31 (0.70, 2.46)  |
| NICU admission                | 24 (12.9)     | 0.95 (0.65, 1.39) | 168 (13.6)       | Reference | 31 (16.7)     | 1.22 (0.88, 1.70)  |
| Neonatal hospitalization ≥5 d | 12 (6.5)      | 1.01 (0.59, 1.73) | 71 (5.8)         | Reference | 17 (9.1)      | 1.56 (1.03, 2.38)* |
| Severe neonatal problem       | 2 (1.1)       | 0.47 (0.11, 1.94) | 26 (2.1)         | Reference | 6 (3.2)       | 1.48 (0.63, 3.50)  |
| Neonatal hyperbilirubinemia   | 30 (16.1)     | 1.03 (0.72, 1.46) | 191 (15.5)       | Reference | 24 (12.9)     | 0.83 (0.56, 1.23)  |
| LGA > 90 <sup>th</sup>        | 17 (9.3)      | 0.81 (0.50, 1.31) | 132 (10.9)       | Reference | 23 (12.5)     | 1.09 (0.73, 1.65)  |
| SGA < 10 <sup>th</sup>        | 11 (6)        | 1.24 (0.67, 2.30) | 60 (5)           | Reference | 8 (4.3)       | 0.72 (0.48, 1.12)  |
| Macrosomia                    | 11 (5.9)      | 0.83 (0.45, 1.52) | 84 (6.9)         | Reference | 16 (8.6)      | 1.20 (0.72, 1.99)  |
| Low birthweight               | 6 (3.2)       | 1.47 (0.61, 3.52) | 26 (2.1)         | Reference | 8 (4.3)       | 1.96 (0.90, 4.26)  |

aRR: adjusted relative risk; CI: confidence interval; GDM: gestational diabetes mellitus; LGA: large for gestational age; NICU: neonatal intensive care unit;

PIH: pregnancy-induced hypertension; SGA: small for gestational age.

\* $P < 0.05$

**Table S4. Association of pregnancy outcomes with gestational weight gain in late pregnancy (>17 week)**

| Outcomes                            | Below (n=236) |                     | Average (n=1233) |           | Above (n=248) |                     |
|-------------------------------------|---------------|---------------------|------------------|-----------|---------------|---------------------|
|                                     | n (%)         | aRR (95% CI)        | n (%)            | aRR       | n (%)         | aRR (95% CI)        |
| GDM                                 | 52 (22)       | 2.67 (1.98, 3.61) * | 97 (7.9)         | Reference | 8 (3.2)       | 0.41 (0.20, 0.83) * |
| PIH                                 | 7 (3)         | 0.82 (0.37, 1.78)   | 44 (3.6)         | Reference | 15 (6.1)      | 1.52 (0.86, 2.69)   |
| Caesarean section                   | 105 (46.9)    | 0.93 (0.80, 1.08)   | 548 (47.3)       | Reference | 129 (56.3)    | 1.24 (1.09, 1.41)*  |
| Preterm birth                       | 6 (2.5)       | 0.50 (0.20, 1.24)   | 54 (4.4)         | Reference | 12 (4.8)      | 1.12 (0.59, 2.12)   |
| NICU admission                      | 35 (14.8)     | 1.11 (0.80, 1.55)   | 168 (13.6)       | Reference | 27 (10.9)     | 0.76 (0.53, 1.10)   |
| Neonatal hospitalization $\geq 5$ d | 14 (5.9)      | 1.13 (0.65, 1.97)   | 71 (5.8)         | Reference | 11 (4.4)      | 0.78 (0.43, 1.43)   |
| Severe neonatal problem             | 6 (2.5)       | 1.60 (0.67, 3.80)   | 26 (2.1)         | Reference | 7 (2.8)       | 1.28 (0.58, 2.84)   |
| Neonatal hyperbilirubinemia         | 28 (11.9)     | 0.77 (0.53, 1.12)   | 191 (15.5)       | Reference | 25 (10.1)     | 0.64 (0.43, 0.94) * |
| LGA > 90 <sup>th</sup>              | 9 (3.9)       | 0.31 (0.16, 0.60)*  | 132 (10.9)       | Reference | 51 (20.8)     | 2.01 (1.50, 2.70)*  |
| SGA < 10 <sup>th</sup>              | 17 (7.4)      | 1.68 (1.00, 2.82) * | 60 (5)           | Reference | 3 (1.2)       | 0.24 (0.07, 0.75)*  |
| Macrosomia                          | 5 (2.1)       | 0.30 (0.12, 0.73)*  | 84 (6.9)         | Reference | 31 (12.6)     | 1.90 (1.30, 2.78)*  |
| Low birthweight                     | 8 (3.4)       | 1.69 (0.78, 3.68)   | 26 (2.1)         | Reference | 3 (1.2)       | 0.54 (0.16, 1.76)   |

aRR: adjusted relative risk; CI: confidence interval; GDM: gestational diabetes mellitus; LGA: large for gestational age; NICU: neonatal intensive care unit;

PIH: pregnancy-induced hypertension; SGA: small for gestational age.

\* $P < 0.05$

**Table S5. Association of pregnancy outcomes with gestational weight gain in late pregnancy (>17 week), by infant sex (27 sex unknown)**

| Outcomes                      | Male             |                    |                                   |           |                    | Female           |                    |                                   |           |                    |
|-------------------------------|------------------|--------------------|-----------------------------------|-----------|--------------------|------------------|--------------------|-----------------------------------|-----------|--------------------|
|                               | Below<br>(n=110) |                    | Average<br>(n=646)<br>(reference) |           | Above<br>(n=120)   | Below<br>(n=120) |                    | Average<br>(n=569)<br>(reference) |           | Above<br>(n=125)   |
|                               | n (%)            | aRR (95% CI)       | n (%)                             | n (%)     | aRR (95% CI)       | n (%)            | aRR (95% CI)       | n (%)                             | n (%)     | aRR (95% CI)       |
| GDM                           | 21(19.1)         | 2.41 (1.52, 3.84)* | 53 (8.2)                          | 3 (2.5)   | 0.30 (0.10, 0.96)* | 29(24.2)         | 2.86 (1.88, 4.35)* | 43 (7.6)                          | 5 (4)     | 0.52 (0.21, 1.28)  |
| PIH                           | 2 (1.8)          | 0.54 (0.13, 2.22)  | 25 (3.9)                          | 5 (4.2)   | 0.95 (0.37, 2.42)  | 5 (4.2)          | 1.16 (0.44, 3.04)  | 19 (3.3)                          | 9 (7.2)   | 2.31 (1.08, 4.95)  |
| Caesarean section             | 61 (57)          | 1.11 (0.93, 1.33)  | 291 (47.5)                        | 62 (56.4) | 1.27 (1.06, 1.52)* | 41(36.6)         | 0.74 (0.57, 0.96)* | 250 (47.3)                        | 66 (56.4) | 1.23(1.03, 1.48)*  |
| Preterm birth                 | 1 (0.9)          | 0.16 (0.02, 1.14)  | 35 (5.4)                          | 7 (5.8)   | 1.13 (0.51, 2.49)  | 4 (3.3)          | 0.97 (0.32, 2.91)  | 17 (3)                            | 4 (3.2)   | 1.23 (0.42, 3.62)  |
| NICU admission                | 16(14.6)         | 1.28 (0.77, 2.13)  | 86 (13.3)                         | 12 (10)   | 0.74 (0.42, 1.30)  | 16(13.3)         | 0.88 (0.58, 1.35)  | 75 (13.2)                         | 14 (11.2) | 0.84 (0.54, 1.30)  |
| Neonatal hospitalization ≥5 d | 5 (4.6)          | 0.84 (0.33, 2.13)  | 42 (6.5)                          | 4 (3.3)   | 0.52 (0.19, 1.41)  | 6 (5)            | 0.83 (0.42, 1.64)  | 28 (4.9)                          | 7 (5.6)   | 0.87 (0.47, 1.59)  |
| Severe neonatal problem       | 0                | NA                 | 17 (2.6)                          | 4 (3.3)   | 1.41 (0.48, 4.10)  | 5 (4.2)          | 2.39 (0.88, 6.54)  | 9 (1.6)                           | 3 (2.4)   | 1.22 (0.35, 4.27)  |
| Neonatal hyperbilirubinemia   | 13(11.8)         | 0.80 (0.47, 1.37)  | 100 (15.5)                        | 9 (7.5)   | 0.46 (0.24, 0.89)* | 15(12.5)         | 0.78 (0.47, 1.30)  | 90 (15.8)                         | 16 (12.8) | 0.79 (0.48, 1.30)  |
| LGA > 90 <sup>th</sup>        | 2 (1.8)          | 0.18 (0.04, 0.73)* | 62 (9.7)                          | 25 (20.8) | 2.18 (1.43, 3.32)* | 7 (5.8)          | 0.38 (0.18, 0.81)* | 70 (12.3)                         | 26 (20.8) | 1.74 (1.17, 2.61)* |
| SGA < 10 <sup>th</sup>        | 8 (7.3)          | 1.31 (0.64, 2.70)  | 37 (5.8)                          | 2 (1.7)   | 0.28 (0.07, 1.13)  | 9 (7.5)          | 1.97 (0.94, 4.15)  | 23 (4)                            | 1 (0.8)   | 0.17 (0.02, 1.27)  |
| Macrosomia                    | 3 (2.7)          | 0.33 (0.11, 1.04)  | 50 (7.8)                          | 19 (15.8) | 2.05 (1.27, 3.31)* | 2 (1.7)          | 0.26 (0.06, 1.05)  | 33 (5.8)                          | 12 (9.6)  | 1.71 (0.92, 3.19)  |
| Low birthweight               | 2 (1.8)          | 0.95 (0.22, 4.11)  | 14 (2.2)                          | 1 (0.8)   | 0.34 (0.05, 2.59)  | 5 (4.2)          | 2.48 (0.87, 7.11)  | 10 (1.8)                          | 1 (0.8)   | 0.42 (0.05, 3.29)  |

aRR: adjusted relative risk; CI: confidence interval; GDM: gestational diabetes mellitus; LGA: large for gestational age; NICU: neonatal intensive care unit; PIH: pregnancy-induced

hypertension; SGA: small for gestational age.

\* $P < 0.05$

**Table S6. Association of pregnancy outcomes with total gestational weight gain**

| Outcome                             | Below (n=392) |                    | Average (n=1842) |           | Above (n=396) |                    |
|-------------------------------------|---------------|--------------------|------------------|-----------|---------------|--------------------|
|                                     | n (%)         | aRR (95% CI)       | n (%)            | aRR       | n (%)         | aRR (95% CI)       |
| GDM                                 | 60 (15.3)     | 1.51 (1.15, 1.98)* | 176 (9.6)        | Reference | 27 (6.8)      | 0.72 (0.49, 1.07)  |
| PIH                                 | 6 (1.5)       | 0.43 (0.19, 0.97)* | 65 (3.5)         | Reference | 26 (6.6)      | 1.78 (1.14, 2.76)* |
| Caesarean section                   | 163 (45)      | 0.96 (0.85, 1.09)  | 778 (45.2)       | Reference | 203 (55.5)    | 1.20 (1.08, 1.32)* |
| Preterm birth                       | 15 (3.8)      | 0.83 (0.47, 1.45)  | 81 (4.4)         | Reference | 22 (5.6)      | 1.35 (0.85, 2.13)  |
| NICU admission                      | 61 (15.6)     | 1.08 (0.85, 1.36)  | 257 (14)         | Reference | 45 (11.4)     | 0.78 (0.59, 1.04)  |
| Neonatal hospitalization $\geq 5$ d | 27 (6.9)      | 1.19 (0.82, 1.72)  | 107 (5.8)        | Reference | 19 (4.8)      | 0.78 (0.50, 1.23)  |
| Severe neonatal problem             | 11 (2.8)      | 1.48 (0.78, 2.81)  | 37 (2)           | Reference | 7 (1.8)       | 0.82 (0.37, 1.79)  |
| Neonatal hyperbilirubinemia         | 58 (14.8)     | 0.97 (0.75, 1.26)  | 285 (15.5)       | Reference | 47 (11.9)     | 0.75 (0.56, 1.00)  |
| LGA > 90 <sup>th</sup>              | 20 (5.2)      | 0.48 (0.30, 0.74)* | 192 (10.6)       | Reference | 80 (20.4)     | 1.91 (1.51, 2.42)* |
| SGA < 10 <sup>th</sup>              | 27 (7)        | 1.53 (1.01, 2.32)* | 87 (4.8)         | Reference | 10 (2.5)      | 0.54 (0.28, 1.02)  |
| Macrosomia                          | 11 (2.8)      | 0.44 (0.24, 0.80)* | 115 (6.3)        | Reference | 53 (13.5)     | 2.16 (1.60, 2.93)* |
| Low birthweight                     | 15 (3.8)      | 1.72 (0.96, 3.08)  | 41 (2.2)         | Reference | 9 (2.3)       | 1.04 (0.51, 2.12)  |

aRR: adjusted relative risk; CI: confidence interval; GDM: gestational diabetes mellitus; LGA: large for gestational age; NICU: neonatal intensive care unit;

PIH: pregnancy-induced hypertension; SGA: small for gestational age.

\* $P < 0.05$

STROBE Statement—Checklist of items that should be included in reports of *cohort studies*

|                              | Item No | Recommendation                                                                                                                                                                                    | Page      |
|------------------------------|---------|---------------------------------------------------------------------------------------------------------------------------------------------------------------------------------------------------|-----------|
| <b>Title and abstract</b>    | 1       | (a) Indicate the study's design with a commonly used term in the title or the abstract                                                                                                            | 1         |
|                              |         | (b) Provide in the abstract an informative and balanced summary of what was done and what was found                                                                                               | 3-4       |
| <b>Introduction</b>          |         |                                                                                                                                                                                                   |           |
| Background/rationale         | 2       | Explain the scientific background and rationale for the investigation being reported                                                                                                              | 6         |
| Objectives                   | 3       | State specific objectives, including any prespecified hypotheses                                                                                                                                  | 7         |
| <b>Methods</b>               |         |                                                                                                                                                                                                   |           |
| Study design                 | 4       | Present key elements of study design early in the paper                                                                                                                                           | 7         |
| Setting                      | 5       | Describe the setting, locations, and relevant dates, including periods of recruitment, exposure, follow-up, and data collection                                                                   | 7         |
| Participants                 | 6       | (a) Give the eligibility criteria, and the sources and methods of selection of participants. Describe methods of follow-up                                                                        | 8         |
|                              |         | (b) For matched studies, give matching criteria and number of exposed and unexposed                                                                                                               | n/a       |
| Variables                    | 7       | Clearly define all outcomes, exposures, predictors, potential confounders, and effect modifiers. Give diagnostic criteria, if applicable                                                          | 9-11      |
| Data sources/<br>measurement | 8*      | For each variable of interest, give sources of data and details of methods of assessment (measurement). Describe comparability of assessment methods if there is more than one group              | 9         |
| Bias                         | 9       | Describe any efforts to address potential sources of bias                                                                                                                                         | 9         |
| Study size                   | 10      | Explain how the study size was arrived at                                                                                                                                                         | 8         |
| Quantitative variables       | 11      | Explain how quantitative variables were handled in the analyses. If applicable, describe which groupings were chosen and why                                                                      | 10-11     |
| Statistical methods          | 12      | (a) Describe all statistical methods, including those used to control for confounding                                                                                                             | 12-13     |
|                              |         | (b) Describe any methods used to examine subgroups and interactions                                                                                                                               | 12        |
|                              |         | (c) Explain how missing data were addressed                                                                                                                                                       | 12        |
|                              |         | (d) If applicable, explain how loss to follow-up was addressed                                                                                                                                    | 12        |
|                              |         | (e) Describe any sensitivity analyses                                                                                                                                                             | n/a       |
| <b>Results</b>               |         |                                                                                                                                                                                                   |           |
| Participants                 | 13*     | (a) Report numbers of individuals at each stage of study—eg numbers potentially eligible, examined for eligibility, confirmed eligible, included in the study, completing follow-up, and analysed | 13        |
|                              |         | (b) Give reasons for non-participation at each stage                                                                                                                                              | fig 1     |
|                              |         | (c) Consider use of a flow diagram                                                                                                                                                                | fig 1     |
| Descriptive data             | 14*     | (a) Give characteristics of study participants (eg demographic, clinical, social) and information on exposures and potential confounders                                                          | table 1   |
|                              |         | (b) Indicate number of participants with missing data for each variable of interest                                                                                                               | n/a       |
|                              |         | (c) Summarise follow-up time (eg, average and total amount)                                                                                                                                       | 13        |
| Outcome data                 | 15*     | Report numbers of outcome events or summary measures over time                                                                                                                                    | table 2-3 |
| Main results                 | 16      | (a) Give unadjusted estimates and, if applicable, confounder-adjusted                                                                                                                             | 14-15     |

|                          |    |                                                                                                                                                                            |       |
|--------------------------|----|----------------------------------------------------------------------------------------------------------------------------------------------------------------------------|-------|
|                          |    | estimates and their precision (eg, 95% confidence interval). Make clear which confounders were adjusted for and why they were included                                     |       |
|                          |    | (b) Report category boundaries when continuous variables were categorized                                                                                                  | n/a   |
|                          |    | (c) If relevant, consider translating estimates of relative risk into absolute risk for a meaningful time period                                                           | n/a   |
| Other analyses           | 17 | Report other analyses done—eg analyses of subgroups and interactions, and sensitivity analyses                                                                             | 15    |
| <b>Discussion</b>        |    |                                                                                                                                                                            |       |
| Key results              | 18 | Summarise key results with reference to study objectives                                                                                                                   | 16    |
| Limitations              | 19 | Discuss limitations of the study, taking into account sources of potential bias or imprecision. Discuss both direction and magnitude of any potential bias                 | 16-17 |
| Interpretation           | 20 | Give a cautious overall interpretation of results considering objectives, limitations, multiplicity of analyses, results from similar studies, and other relevant evidence | 17-22 |
| Generalisability         | 21 | Discuss the generalisability (external validity) of the study results                                                                                                      | 22    |
| <b>Other information</b> |    |                                                                                                                                                                            |       |
| Funding                  | 22 | Give the source of funding and the role of the funders for the present study and, if applicable, for the original study on which the present article is based              | 23    |

\*Give information separately for exposed and unexposed groups.

**Note:** An Explanation and Elaboration article discusses each checklist item and gives methodological background and published examples of transparent reporting. The STROBE checklist is best used in conjunction with this article (freely available on the Web sites of PLoS Medicine at <http://www.plosmedicine.org/>, Annals of Internal Medicine at <http://www.annals.org/>, and Epidemiology at <http://www.epidem.com/>). Information on the STROBE Initiative is available at <http://www.strobe-statement.org>.

# BMJ Open

## Gestational weight gain and adverse pregnancy outcomes: a prospective cohort study

|                                 |                                                                                                                                                                                                                                                                                                                                                                                                                                                                                                                                                                                                                                                                                                                                                                                 |
|---------------------------------|---------------------------------------------------------------------------------------------------------------------------------------------------------------------------------------------------------------------------------------------------------------------------------------------------------------------------------------------------------------------------------------------------------------------------------------------------------------------------------------------------------------------------------------------------------------------------------------------------------------------------------------------------------------------------------------------------------------------------------------------------------------------------------|
| Journal:                        | <i>BMJ Open</i>                                                                                                                                                                                                                                                                                                                                                                                                                                                                                                                                                                                                                                                                                                                                                                 |
| Manuscript ID                   | bmjopen-2020-038187.R3                                                                                                                                                                                                                                                                                                                                                                                                                                                                                                                                                                                                                                                                                                                                                          |
| Article Type:                   | Original research                                                                                                                                                                                                                                                                                                                                                                                                                                                                                                                                                                                                                                                                                                                                                               |
| Date Submitted by the Author:   | 21-Jul-2020                                                                                                                                                                                                                                                                                                                                                                                                                                                                                                                                                                                                                                                                                                                                                                     |
| Complete List of Authors:       | Wu, Yuelin; Shanghai First Maternity and infant hospital, Department of Obstetrics<br>Wan, Sheng; Shanghai First Maternity and infant hospital, Department of Obstetrics<br>Gu, Shengyi; Xinhua Hospital, Shanghai Jiao Tong University School of Medicine, Department of Obstetrics and Gynecology<br>Mou, Zhengqian; Xinhua Hospital, Shanghai Jiao Tong University School of Medicine, Department of Obstetrics and Gynecology<br>Dong, Lingling; Shanghai First Maternity and infant hospital, Department of Obstetrics<br>Luo, Zhong-Cheng; Lunenfeld-Tanenbaum Research Institute, Obstetrics and Gynecology, Mount Sinai Hospital<br>Zhang, Jun ; Shanghai Jiao Tong University,<br>Hua, Xiaolin; Shanghai First Maternity and infant hospital, Department of Obstetrics |
| <b>Primary Subject Heading</b>: | Obstetrics and gynaecology                                                                                                                                                                                                                                                                                                                                                                                                                                                                                                                                                                                                                                                                                                                                                      |
| Secondary Subject Heading:      | Obstetrics and gynaecology                                                                                                                                                                                                                                                                                                                                                                                                                                                                                                                                                                                                                                                                                                                                                      |
| Keywords:                       | EPIDEMIOLOGY, Maternal medicine < OBSTETRICS, Fetal medicine < OBSTETRICS, OBSTETRICS                                                                                                                                                                                                                                                                                                                                                                                                                                                                                                                                                                                                                                                                                           |
|                                 |                                                                                                                                                                                                                                                                                                                                                                                                                                                                                                                                                                                                                                                                                                                                                                                 |

SCHOLARONE™  
Manuscripts





I, the Submitting Author has the right to grant and does grant on behalf of all authors of the Work (as defined in the below author licence), an exclusive licence and/or a non-exclusive licence for contributions from authors who are: i) UK Crown employees; ii) where BMJ has agreed a CC-BY licence shall apply, and/or iii) in accordance with the terms applicable for US Federal Government officers or employees acting as part of their official duties; on a worldwide, perpetual, irrevocable, royalty-free basis to BMJ Publishing Group Ltd ("BMJ") its licensees and where the relevant Journal is co-owned by BMJ to the co-owners of the Journal, to publish the Work in this journal and any other BMJ products and to exploit all rights, as set out in our [licence](#).

The Submitting Author accepts and understands that any supply made under these terms is made by BMJ to the Submitting Author unless you are acting as an employee on behalf of your employer or a postgraduate student of an affiliated institution which is paying any applicable article publishing charge ("APC") for Open Access articles. Where the Submitting Author wishes to make the Work available on an Open Access basis (and intends to pay the relevant APC), the terms of reuse of such Open Access shall be governed by a Creative Commons licence – details of these licences and which [Creative Commons](#) licence will apply to this Work are set out in our licence referred to above.

Other than as permitted in any relevant BMJ Author's Self Archiving Policies, I confirm this Work has not been accepted for publication elsewhere, is not being considered for publication elsewhere and does not duplicate material already published. I confirm all authors consent to publication of this Work and authorise the granting of this licence.

# Gestational weight gain and adverse pregnancy outcomes: a prospective cohort study

Yuelin Wu, MA<sup>1#</sup>, Sheng Wan, MD<sup>1#</sup>, Shengyi Gu, MA<sup>2</sup>, Zhengqian Mou, MA<sup>2</sup>, Lingling Dong, MA<sup>1</sup>, Zhongcheng Lou, PhD<sup>3</sup>, Jun Zhang, PhD<sup>2\*</sup>, Xiaolin Hua, MD<sup>1\*</sup>

1. Department of Obstetrics, Shanghai First Maternity and Infant Hospital, Shanghai Tongji University School of Medicine, Shanghai, China
2. Department of Obstetrics and Gynecology, Xinhua Hospital, Shanghai Jiao Tong University School of Medicine, Shanghai, China
3. Lunenfeld-Tanenbaum Research Institute, Obstetrics and Gynecology, Mount Sinai Hospital, Department of Obstetrics and Gynecology, University of Toronto, Toronto, Canada

**#These authors contributed equally to this work.**

**\*Correspondence:**

**Xiaolin Hua, MD**

Department of Obstetrics, Shanghai First Maternity and infant hospital, Shanghai Tongji University School of Medicine, Shanghai, China

2699 West Gaoke Road, Shanghai, China 201204

Tel: 021-20261000

1  
2  
3  
4 Fax: 021-20261000  
5

6  
7 Email: xiaolin\_hua@tongji.edu.cn  
8  
9

10  
11  
12 **Jun Zhang, PhD**  
13

14 Department of Obstetrics and Gynecology, Xinhua Hospital, Shanghai Jiao Tong University  
15

16  
17 School of Medicine  
18

19  
20 1665 Kongjiang Road, Shanghai, China 200092  
21

22  
23 Tel: 021-25078999  
24

25  
26 Fax: 021-25078293  
27

28  
29 Email: zhangjun@xinhumed.com.cn  
30  
31  
32  
33  
34  
35  
36  
37  
38  
39  
40  
41  
42  
43  
44  
45  
46  
47  
48  
49  
50  
51  
52  
53  
54  
55  
56  
57  
58  
59  
60

## Abstract

**Objective** To assess the associations of gestational weight gain (GWG) in early and late pregnancy with subsequent risks of adverse pregnancy outcomes in Chinese women.

**Design** Prospective cohort study.

**Setting** Shanghai, China.

**Participants** We studied 2630 nulliparous singleton pregnant women with complete data on weight gain in early ( $\leq 17$  week of gestation) and late ( $> 17$  week) pregnancy in the Shanghai Birth Cohort.

**Methods** GWG was standardized into z-scores by gestational age and categorized as low (z score  $< -1$ ), normal ( $-1$  to  $1$ ), and high ( $> 1$ ). The adjusted relative risks (aRRs) and 95% confidence intervals (CIs) were estimated through log-binomial regression models. Interaction effects between GWG and some other adjustment factors were tested, further stratified analyses were performed separately where interaction terms were significant.

1  
2  
3  
4 **Outcome measures** Adverse maternal and neonatal outcomes.  
5  
6  
7

8 **Results** Independent from GWG in late pregnancy, higher GWG in early pregnancy  
9  
10 was associated with higher risks of gestational diabetes mellitus (aRR: 1.66; 95% CI:  
11  
12 1.11–2.48), caesarean section (aRR: 1.21; 95% CI: 1.05–1.39), and prolonged  
13  
14 hospitalization (aRR: 1.56; 95% CI: 1.03–2.38). Higher GWG in late pregnancy was  
15  
16 independently associated with higher risks of caesarean section (aRR: 1.24; 95% CI:  
17  
18 1.09–1.41), large for gestational age (aRR: 2.01; 95% CI: 1.50–2.7), and macrosomia  
19  
20 (aRR: 1.90; 95% CI: 1.30–2.78). In addition, the risk of gestational hypertension  
21  
22 increased significantly with increased total GWG (aRR: 1.78; 95% CI: 1.14–2.76). The  
23  
24 effects of GWG in late pregnancy on maternal and neonatal outcomes were  
25  
26 significantly different between the women bearing a female and the women bearing  
27  
28 male fetus.  
29  
30  
31  
32  
33  
34  
35  
36  
37  
38  
39  
40  
41  
42  
43  
44  
45  
46  
47

48 **Conclusion** The GWG associations with adverse pregnancy outcomes differ at early  
49  
50 and late pregnancy, and there may be effect modification by fetal sex in the association  
51  
52 of GWG in late pregnancy with some pregnancy outcomes.  
53  
54  
55  
56  
57

58 **Keywords** gestational weight gain, pregnancy outcomes, z-scores, fetal sex  
59  
60

## Strengths and limitations of this study

1. Weight gain data collected before and during pregnancy enabled us to investigate the effect of timing of weight gain on the outcomes.
2. The use of z-scores instead of original weight gain value to account for the gestational-age-dependent nature of GWG allowed us to differentiate the effect caused by weight gain from the effect caused by duration of pregnancy.
3. Effect modification by fetal sex was investigated.
4. Only short-term rather than long-term pregnancy outcomes were investigated.
5. Pre-pregnancy weight was self-reported rather than measured.

## Introduction

Gestational weight gain (GWG) has been associated with pregnancy outcomes. Insufficient weight gain has been linked with increased risks of low birth weight, small for gestational age (SGA) and preterm birth, while excessive weight gain has been associated with large for gestational age (LGA), gestational diabetes mellitus (GDM), preeclampsia, preterm birth, caesarean section, infant mortality and childhood obesity<sup>[1-2]</sup>. However, although women are routinely weighed in clinical settings and receive gestational weight gain advice<sup>[3-4]</sup>, a high proportion of pregnant women gain above or below GWG weight ranges recommended by the guidelines<sup>[5]</sup>. Based on data collected from 23 studies involving more than 1.3 million women, GWG was below or above the weight gain range suggested by Institute of Medicine (IOM) guidelines in 23% and 47% of pregnancies, respectively<sup>[1]</sup>, and the prevalence of excess gestational weight gain appears to be on the rise<sup>[6]</sup>.

It is well established that total GWG affects pregnancy outcomes<sup>[7]</sup>. Some studies suggest that GWG during early pregnancy may be more important than GWG at late pregnancy for developing certain pregnancy outcomes such as GDM and adverse

1  
2  
3  
4 cardio-metabolic profile in the offspring<sup>[8-11]</sup>. Overall, studies examining associations  
5  
6  
7  
8 of early GWG with perinatal outcomes have been relatively few, and these studies have  
9  
10  
11 often not accounted for the effects of weight gain during other periods of pregnancy<sup>[12]</sup>.  
12

13  
14 In a Chinese population-based study, our objective was to explore the association of  
15  
16  
17  
18 GWG during early and late pregnancy with maternal and neonatal outcomes .  
19

## 20 21 22 **Materials and Methods**

### 23 24 25 *Study design and data source*

26  
27  
28  
29  
30 This prospective cohort study is based on the recently developed Shanghai Birth Cohort  
31  
32  
33 (SBC) which has been described in details elsewhere<sup>[13]</sup>. Briefly, the SBC is a  
34  
35  
36  
37  
38 prospective observational study conducted in Shanghai, China, aiming to examine  
39  
40  
41 factors affecting fecundability, pregnancy outcomes, child growth and development,  
42  
43  
44 and risks of diseases. The cohort recruited 4127 women in pre-conception care (701)  
45  
46  
47  
48 or early antenatal care (3426). Written informed consent was obtained from the  
49  
50  
51  
52 participants. The data was collected between September 1st, 2013 and November 31th,  
53  
54  
55  
56 2016, resulting in 3699 live births. The collected data included maternal demographical  
57  
58  
59 characteristics, health behaviors, reproductive history, as well as clinical information  
60



1  
2  
3  
4 related to pregnancy, birth and pregnancy outcomes. This study was approved by  
5  
6  
7  
8 Xinhua Hospital Research Ethics Committee, Shanghai Jiao Tong University School of  
9  
10  
11 Medicine (reference number: XHEC-F-NSFC-2018-122).  
12  
13  
14

### 15 ***Study population***

16  
17  
18  
19 The present study collected the data from all singleton pregnancies in women with age  
20  
21  
22  
23  $\geq 20$  years old who started antenatal care before 17 week's gestation and delivered at  
24  
25  
26  
27  $\geq 28$  week of gestation with data available on weight gains in early and late gestation in  
28  
29  
30 the SBC cohort.  
31  
32

33  
34 Gestational age was estimated based on the date of last menstruation period and  
35  
36  
37 confirmed by first trimester ultrasound date. The eligible data collected in this study  
38  
39  
40 were obtained from: (1) self-reported pre-pregnancy weight (kg); (2) weight and height  
41  
42  
43 (cm) measured in early pregnancy (17 week of gestation or less); and (3) weight  
44  
45  
46 measured within the last week of pregnancy. Subjects were excluded if: (1) weight in  
47  
48  
49 early pregnancy  $< 30$  kg or  $> 350$  kg; or (2) z-score of gestational weight gain  $< -4.0$   
50  
51  
52 or  $> 4.0$ , the methods used in the study were similar to the study conducted by Johansson  
53  
54  
55 et al<sup>[14]</sup>. Women with pre-existing medical conditions such as pre-gestational diabetes,  
56  
57  
58  
59  
60

1  
2  
3  
4 hypo- or hyper-thyroidism (affecting GWG)<sup>[15]</sup> and heart/liver/kidney diseases were  
5  
6  
7  
8 also excluded.  
9

### 10 11 ***Weight measurements***

12  
13  
14  
15  
16 Pre-pregnancy weight (kg) was based on self-reporting, while weight at early  
17  
18  
19 pregnancy and at delivery was routinely measured to the nearest 0.1 kg using the  
20  
21  
22  
23 available electronic weighing device in the prenatal care clinics. Height (cm) at the first  
24  
25  
26 prenatal visit was routinely measured to the nearest 0.1 cm using the available  
27  
28  
29  
30 electronic stadiometer in the hospital. Pre-pregnancy body mass index (BMI; kg/m<sup>2</sup>)  
31  
32  
33 was calculated as pre-pregnancy weight (kg) divided by height (m)<sup>2</sup> and categorized as  
34  
35  
36  
37  
38  
39  
40  
41  
42  
43  
44  
45  
46  
47  
48  
49  
50  
51  
52  
53  
54  
55  
56  
57  
58  
59  
60  
underweight (<18.5 kg/m<sup>2</sup>), normal weight (18.5 to 24.9 kg/m<sup>2</sup>), overweight (25.0 to  
29.9 kg/m<sup>2</sup>), and obese ( $\geq 30.0$  kg/m<sup>2</sup>)<sup>[16]</sup>.

The 2009 IOM recommendations suggested 0.5 to 2 kg weight gain for women in the  
first trimester (0 to 13 week)<sup>[5]</sup> and the 50<sup>th</sup> centile GWG for women at gestational age  
 $\leq 17$  week is below 2 kg according to the INTERGROWTH-21<sup>st</sup> Project<sup>[2]</sup>. However,  
early pregnancy in this study was defined as gestational age  $\leq 17$  week so as to include  
virtually all women who started the first antenatal care in the hospital<sup>[17]</sup>. In addition,

1  
2  
3  
4 the 2009 IOM recommendations suggested total GWG of 12.5 to 18 kg for women with  
5  
6  
7  
8 pre-pregnancy BMI less than 18.5 (underweight); 11.5 to 16 kg for those with BMI of  
9  
10  
11 18.5 to 24.9 (normal weight); 7 to 11.5 kg for those with an initial BMI of 25.0 to 29.9  
12  
13  
14 (overweight); and 5 to 9 kg for those with an initial BMI greater than 30.0 (obese) [5].  
15  
16  
17

18 In this study, due to the sporadic number of obese women, we analyze them together  
19  
20  
21 with overweight women. We examined GWG in early pregnancy (the last weight  
22  
23  
24 measured  $\leq 17$  week minus pre-pregnancy weight) and late pregnancy (last  
25  
26  
27 measurement of weight prior to delivery minus the last weight measured  $\leq 17$  week).  
28  
29  
30

31  
32 Total GWG was calculated as last measurement of weight before delivery minus pre-  
33  
34  
35 pregnancy weight. All GWG values were standardized into z-scores by gestational age,  
36  
37  
38 stratified by BMI categories. The means and standard deviations (SD) of GWGs in  
39  
40  
41 early pregnancy and late pregnancy were used to convert the GWG values into z-scores.  
42  
43  
44

45  
46 All GWG z-scores were first examined as continuous variables, and then categorized  
47  
48  
49 as  $< -1.0$  (below),  $-1.0$  to  $+1.0$  (average) and  $> +1.0$  (above) in data analyses. Previous  
50  
51  
52  
53 studies suggested different associations of gestational stage-specific weight gain with  
54  
55  
56  
57 maternal and neonatal outcomes<sup>[8]</sup>. For example, weight gain in early pregnancy is  
58  
59  
60

1  
2  
3  
4 associated with offspring BMI, whereas weight gain in mid pregnancy tended to be  
5  
6  
7  
8 associated with the offspring's metabolic and inflammatory biomarkers<sup>[5, 8]</sup>. Thus, to  
9  
10  
11 disentangle the associations of other periods of GWG with pregnancy outcomes from  
12  
13  
14  
15 GWG in specific periods, we restricted the analyses for GWG in early pregnancy in  
16  
17  
18 women whose GWGs in late pregnancy were average (-1.0 to +1.0). Similarly, the  
19  
20  
21 analyses for late pregnancy weight gain were restricted to women with weight gain  
22  
23  
24  
25 value in early pregnancy within -1.0 to +1.0.  
26  
27  
28

### 29 ***Covariates***

30  
31  
32  
33 Co-variables included fetal sex, maternal age (20 to 34,  $\geq 35$  years), parity (0,  $\geq 1$ ), pre-  
34  
35  
36 pregnancy body mass index (BMI) categories (underweight, normal, overweight/obese),  
37  
38 alcohol/tobacco use (yes or no), GDM (yes or no), gestational hypertension (yes or no)  
39  
40  
41 and length of gestation (28 to 36,  $\geq 37$  week).  
42  
43  
44  
45  
46  
47

### 48 ***Outcomes***

49  
50  
51  
52 The outcomes included gestational diabetes mellitus (GDM), gestational hypertension,  
53  
54  
55 caesarean section, preterm birth, neonatal intensive care unit (NICU) admission,  
56  
57  
58  
59 neonatal prolonged hospitalization ( $\geq 5$  days), severe neonatal outcomes, neonatal  
60

1  
2  
3  
4 hyperbilirubinemia ( $\leq 12$  mg/dL), LGA, SGA, macrosomia ( $>4000$  g) and low  
5  
6  
7  
8 birthweight ( $<2500$  g).  
9

10  
11 All women received a 75 g oral glucose tolerance test (OGTT) during 24-28 week of  
12  
13  
14 gestation. GDM was diagnosed according to the IADPSG criteria: if anyone had the  
15  
16  
17  
18 glucose values fell at or above the following thresholds: fasting 5.1 mmol/L, 1 hour  
19  
20  
21 10.0 mmol/L, 2 hour 8.5 mmol/L. Gestational hypertension was defined as de novo  
22  
23  
24  
25 hypertension (systolic blood pressure  $\geq 140$  mmHg or diastolic blood pressure  $\geq 90$   
26  
27  
28 mmHg) after 20 week's gestation. Preterm birth was defined as gestational age at  
29  
30  
31  
32 delivery  $<37$  week. SGA was defined as birth weight  $\leq 10^{\text{th}}$  percentile, and LGA as birth  
33  
34  
35  
36 weight  $\geq 90^{\text{th}}$  percentile according to Chinese sex- and gestational age-specific birth  
37  
38  
39  
40 weight standards<sup>[18]</sup>. Severe neonatal outcomes included death, 5 minute APGAR score  
41  
42  
43  $<7$ , hypoglycemia ( $<40$  mg/dL), sepsis, cardiopulmonary resuscitation or ventilator  
44  
45  
46 support within 24 hours after birth, severe respiratory disorders (respiratory distress  
47  
48  
49  
50 syndrome or transient tachypnea of the newborn), serious birth defects, seizures,  
51  
52  
53  
54 necrotizing enterocolitis, and hypoxic-ischemic encephalopathy.  
55  
56

### 57 ***Statistical analyses***

58  
59  
60

1  
2  
3  
4 Maternal demographic characteristics and clinical factors were compared across GWG  
5  
6  
7  
8 groups. Continuous variables were described by mean with standard deviation (SD) or  
9  
10  
11 median with interquartile range (IQR). Categorical variables were described by  
12  
13  
14 frequencies (%). Analysis of variance or Kruskal-Wallis H tests were performed for  
15  
16  
17 continuous data, and chi-square tests or Fisher's exact tests were performed for  
18  
19  
20  
21  
22 categorical data.  
23  
24

25 The incidence of adverse pregnancy outcomes were examined among three GWG  
26  
27  
28 groups. Multivariate log-binomial regression models were used to estimate the  
29  
30  
31 unadjusted relative risks (RRs), adjusted relative risks (ARRs) and 95% confidence  
32  
33  
34 intervals (CIs) of adverse pregnancy outcomes across GWG groups. Regression model  
35  
36  
37 for maternal outcomes were adjusted for only co-variables with  $p < 0.2$  (maternal age,  
38  
39  
40 parity, pre-pregnancy BMI, alcohol/tobacco use, fetal sex and length of gestation).  
41  
42  
43  
44  
45

46 Women with GDM or HIP have long been known to be at increased risk for adverse  
47  
48  
49 neonatal outcomes, including neonatal intensive care admission, cesarean section,  
50  
51  
52 preterm delivery  $< 37$  weeks and neonatal morbidity<sup>[19, 20]</sup>. As a result, neonatal  
53  
54  
55  
56  
57 outcomes models were further adjusted for GDM and PIH in addition to the  
58  
59  
60

1  
2  
3  
4  
5  
6  
7  
8  
9  
10  
11  
12  
13  
14  
15  
16  
17  
18  
19  
20  
21  
22  
23  
24  
25  
26  
27  
28  
29  
30  
31  
32  
33  
34  
35  
36  
37  
38  
39  
40  
41  
42  
43  
44  
45  
46  
47  
48  
49  
50  
51  
52  
53  
54  
55  
56  
57  
58  
59  
60

aforementioned factors. Effects between weight gain and fetal sex and other covariates on adverse neonatal outcomes were also investigated. Interaction effects between GWG and fetal sex and other covariates (parity, maternal pre-pregnancy BMI, maternal age) on adverse maternal and neonatal outcomes were also tested.

All analyses were performed using the Statistical Analysis System (SAS) for Windows, version 9.4 (SAS Institute, Cary, NC).  $P < 0.05$  was considered statistically significant.

### ***Patient and public involvement***

No patients were involved in the design, or conduct, or reporting, or dissemination plans of our research.

## **Results**

### ***Study population and characteristics***

A total of 2630 pregnant women met the study inclusion criteria (Figure 1). The characteristics of all pregnant women in the study by total GWG is shown in Table 1. Among them, 1605 women who gained average weight in late pregnancy (z-score -1 to +1) were analyzed for the association of GWG in early pregnancy with the outcomes (Table S1); while 1717 women who gained average weight in early pregnancy were

1  
2  
3  
4 analyzed for the association of GWG in late pregnancy with the outcomes (Table S2).  
5  
6  
7

8 It should be noticed that for the two analytic datasets, the reference group was the same  
9  
10  
11 group of women who had average GWG in both early and late pregnancy (n=1233).  
12  
13

### 14 15 ***Weight gain during early pregnancy*** 16

17  
18  
19 The risks of maternal and neonatal outcomes for GWG in early pregnancy are presented  
20  
21  
22 in Figure 2A and Table S3. Lower GWG was not significantly associated with  
23  
24  
25 pregnancy outcomes, compared with the average GWG. In contrast, the risks of GDM  
26  
27  
28 (aRR=1.66; 95% CI: 1.11-2.48), caesarean section (aRR=1.21; 95% CI: 1.05-1.39) and  
29  
30  
31 prolonged hospitalization (aRR=1.56; 95% CI: 1.03-2.38) were higher in the group  
32  
33  
34 with GWG above average in early pregnancy. No significant interactions between  
35  
36  
37  
38  
39  
40  
41 GWG in early pregnancy and covariates were observed.  
42  
43

### 44 45 ***Weight gain during late pregnancy*** 46

47  
48  
49 Associations of GWG in late pregnancy with perinatal outcomes are presented in Figure  
50  
51  
52  
53 2B and Table S4. In contrast to early pregnancy, the risks for GDM and SGA decreased  
54  
55  
56 significantly with increased GWG in late pregnancy, whereas the risks for LGA and  
57  
58  
59 macrosomia increased. Weight gain above average was correlated with a higher risk for  
60



1  
2  
3  
4 caesarean section (aRR=1.24; 95% CI: 1.09-1.41) in late pregnancy. In addition, higher  
5  
6  
7  
8 GWG showed a protective effect against neonatal hyperbilirubinemia (aRR=0.64; 95%  
9  
10  
11 CI: 0.43-0.94).

12  
13  
14  
15 Significant interactions were identified between GWG in late pregnancy and fetal sex.

16  
17  
18 Figure 3 and Table S5 shows the associations of late pregnancy weight gain with  
19  
20  
21 pregnancy outcomes stratified by fetal sex. The risks for LGA and caesarean section  
22  
23  
24 significantly increased in women with higher GWG in late pregnancy, but the risk of  
25  
26  
27  
28  
29 GDM increased with less GWG, regardless of fetal sex. However, higher risks of  
30  
31  
32 gestational hypertension (aRR=2.31; 95% CI: 1.08-4.95) was only observed in women  
33  
34  
35 bearing a female fetus with higher GWG. Conversely, higher GWG in late pregnancy  
36  
37  
38 was associated with GDM (aRR=0.30; 95% CI: 0.10-0.96), neonatal  
39  
40  
41 hyperbilirubinemia (aRR=0.46; 95% CI: 0.24-0.89) and macrosomia (aRR=2.05; 95%  
42  
43  
44 CI: 1.27-3.31) for women bearing a boy, but not for women bearing a girl, indicating  
45  
46  
47 effect modifications by fetal sex. But when stratified by fetal sex, the lower risk of SGA  
48  
49  
50  
51  
52  
53  
54 with higher GWG was no longer observed.

55  
56  
57 ***Total weight gain during pregnancy***  
58  
59  
60

1  
2  
3  
4 Figure 2C and Table S6 show results for pregnancy outcomes by total GWG. The effect  
5  
6  
7  
8 sizes of GWG in late pregnancy on pregnancy outcomes were almost identical with the  
9  
10  
11 effect sizes of total GWG. Similar to late pregnancy, the risks for LGA, macrosomia  
12  
13  
14 and gestational hypertension increased significantly with increased total GWG. Higher  
15  
16  
17  
18 GWG was also linked with a higher risk for caesarean section (aRR=1.78; 95% CI:  
19  
20  
21 1.14-2.76). Moreover, total GWG below the average was associated with higher risks  
22  
23  
24 of GDM (aRR=1.51; 95% CI: 1.15-1.98) and SGA (aRR=1.53; 95% CI: 1.01-2.32). No  
25  
26  
27  
28  
29 significant interactions between total GWG and other covariates were identified.  
30  
31

## 32 **Discussion**

### 33 **Main Findings**

34  
35  
36  
37  
38  
39  
40  
41 In this study, we found different associations of gestational stage-specific weight gain  
42  
43  
44  
45 with maternal and neonatal outcomes. Of those, independent of GWG in late pregnancy,  
46  
47  
48  
49 higher GWG in early pregnancy was associated with higher risks of GDM, caesarean  
50  
51  
52 section, and neonatal prolonged hospitalization.  
53  
54

### 55 **Strengths and limitations**

56  
57  
58  
59  
60 There are strengths in our study. In the study, some improvements have been made

1  
2  
3  
4 when compared with other studies reported in the literature. First, the SBC database  
5  
6  
7  
8 contains detailed clinical data including pre-pregnancy weight, weight measurements  
9  
10  
11 during pregnancy and pregnancy weight measurements before delivery. This made it  
12  
13  
14 possible to study GWG in both early and late pregnancy. In addition, it is difficult to  
15  
16  
17 disentangle the effects of GWG on adverse pregnancy outcomes from the effects of the  
18  
19  
20 gestation duration, because GWG is highly correlated with the gestational duration.  
21  
22  
23  
24  
25 However, the use of GWG z-scores in our study can overcome this limitation. This  
26  
27  
28  
29 method ensured that the weight gain of women who experience adverse pregnancy  
30  
31  
32 outcomes would be compared with the weight gain of women without adverse  
33  
34  
35 outcomes at the same point in pregnancy<sup>[14, 21]</sup>.

36  
37  
38  
39  
40 There are also limitations in our study. We only investigated the short-term perinatal  
41  
42  
43 outcomes. Recently, researchers have linked an individual's susceptibility to chronic  
44  
45  
46 disease such as cardio-metabolic disease and obesity in later life to events during the  
47  
48  
49 intrauterine phase of development<sup>[8, 22-23]</sup>. Further studies on long-term outcomes would  
50  
51  
52  
53  
54 provide important evidence regarding the associations between chronic diseases and  
55  
56  
57 events during the intrauterine phase.  
58  
59  
60

## Interpretation

Associations between insufficient or excessive weight gain during the whole pregnancy and maternal and child health outcomes have been well described<sup>[1-2, 7]</sup>. A meta-analysis of pooled 1309136 participant data from 23 cohort studies showed that women who gained high weight were more likely to have LGA, caesarean section and macrosomia, while women who gained less weight were at higher risk of SGA<sup>[1]</sup>. These findings are in line with the association of maternal weight gain with adverse pregnancy outcomes in our study.

There is growing recognition that the impacts of gestational stage-specific weight gain on pregnancy outcomes may vary<sup>[8-9, 22, 24-25]</sup>. GWG in early pregnancy largely reflects maternal fat deposition, whereas GWG thereafter is mainly attributed to maternal and amniotic fluid expansion, and growth of the fetus, placenta and uterus<sup>[5]</sup>. In this study, mothers with increased fat deposition during pregnancy may affect the adiposity of the offspring by higher placental transfer of nutrients, such as glucose and free fatty acids, which may lead to maternal pregnancy complications, such as GDM, and permanent fetal and childhood adaptations in appetite, energy metabolism and neuro-endocrine function <sup>[25-26]</sup>. Therefore, GWG in early pregnancy, prior to the development of

1  
2  
3  
4 pregnancy outcomes, might be as or more important than GWG in late pregnancy with  
5  
6  
7  
8 respect to pregnancy outcomes<sup>[9, 14]</sup>. A study of 5908 Netherlands mother-offspring  
9  
10  
11 pairs reported that higher weight gain in early pregnancy was associated with an  
12  
13  
14 adverse cardio-metabolic profile in the offspring<sup>[8]</sup>. Similarly, a study of 5154 UK  
15  
16  
17 mother-offspring pairs showed that GWG in the first 14 week tended to be  
18  
19  
20 incrementally associated with offspring BMI, waist circumference and fat mass in  
21  
22  
23 children at age 9 years, but after 14 week of gestation, only high levels of GWG were  
24  
25  
26 associated with offspring's adiposity measures, highlighting the importance of the  
27  
28  
29 timing of weight gain in pregnancy<sup>[24]</sup>.  
30  
31  
32  
33  
34  
35

36 Studies to clarify the relationship between gestational stage-specific weight gain and  
37  
38  
39 adverse pregnancy outcomes have been sporadic. A study of Korean pregnant women  
40  
41  
42 found that GWG velocity at early pregnancy was significantly associated with GDM,  
43  
44  
45 gestational hypertension, cesarean section, LGA, and macrosomia<sup>[12]</sup>. However, the  
46  
47  
48 analyses have not accounted for the effects of weight gain in other periods of pregnancy.  
49  
50  
51  
52  
53 In contrast, our analyses for early/late pregnancy GWG were restricted to women  
54  
55  
56 whose GWG z-scores in other pregnancy stage were normal, and thus the observed  
57  
58  
59  
60

1  
2  
3  
4 associations are independent of GWG in different periods. Our data from a large  
5  
6  
7  
8 population-based Chinese cohort in Shanghai showed that higher, but not lower,  
9  
10  
11 maternal GWG in early pregnancy was associated with increased risks of adverse  
12  
13  
14 pregnancy outcomes, including GDM, caesarean section and prolonged hospitalization.  
15  
16

17  
18 In late pregnancy, low weight gain was associated with GDM as well as SGA, and high  
19  
20  
21 weight gain was associated with caesarean section, LGA and macrosomia.  
22  
23

24  
25 High GWG in early pregnancy has been associated with an increased risk of GDM,  
26  
27  
28 while there are some inconsistent data concerning the associations of GWG in second  
29  
30  
31 and third trimester or the whole pregnancy with GDM<sup>[11, 27-29]</sup>. Our study presents  
32  
33  
34 results which are in consistent with results produced by other studies <sup>[12, 27, 30]</sup> indicating  
35  
36  
37 that higher GWG in early pregnancy may increase the risk of developing GDM, but  
38  
39  
40 higher GWG in late pregnancy shows a reversed association. The discrepancy might be  
41  
42  
43 due to that women diagnosed with GDM might have undergone weight control  
44  
45  
46 interventions such as prescribed diet and physical exercise after the GDM diagnosis.  
47  
48  
49

50  
51  
52  
53 Avoiding high weight gain in early pregnancy may prevent GDM, and health  
54  
55  
56 professionals who assist prenatal care might consider preemptive actions in high-risk  
57  
58  
59  
60

1  
2  
3  
4 pregnant women.  
5  
6  
7

8 The risk of gestational hypertension increases significantly with higher maternal total  
9  
10  
11 GWG. A study of 29861 women from 25 hospitals in America showed that early weight  
12  
13  
14 gain over the 2009 IOM recommendation were shown to be associated with the  
15  
16  
17 development of gestational hypertension<sup>[31]</sup>. In a study of 101259 women with chronic  
18  
19  
20 hypertension, women who gained the amount of weight above the GWG range  
21  
22  
23 recommended by IOM guidelines were at increased risks of eclampsia<sup>[32]</sup>. Given the  
24  
25  
26 known vascular permeability and decreased plasma oncotic pressure that accompanies  
27  
28  
29 preeclampsia and its association with rapid weight gain<sup>[33]</sup>, excessive GWG may be a  
30  
31  
32 cause of hypertensive disease of pregnancy.  
33  
34  
35  
36  
37  
38  
39

40 Total GWG on average (-1 to +1) in our study were  $15.2 \pm 2.3$  kg for women with pre-  
41  
42  
43 pregnancy BMI less than 18.5 (underweight) and  $15.0 \pm 2.5$  kg for those who with pre-  
44  
45  
46 pregnancy BMI of 18.5 to 24.9 (normal weight), which corresponded to the 2009 IOM  
47  
48  
49 recommendations. Specifically, the 2009 IOM recommendations suggested GWG of  
50  
51  
52  
53 12.5 to 18 kg for underweight women and 11.5 to 16 kg for normal weight women<sup>[5]</sup>.  
54  
55  
56

57 However, due to the sporadic number of obese women, we analyzed them together with  
58  
59  
60

1  
2  
3  
4 overweight women. Total GWG on average were  $12.3 \pm 3.7$  kg for women with pre-  
5  
6  
7  
8 pregnancy BMI greater than 25.0 (overweight and obese) in our study, which in general  
9  
10  
11 was higher than the 2009 IOM recommended GWG range with 7 to 11.5 kg for  
12  
13  
14 overweight and 5 to 9 kg for obese<sup>[5]</sup>. The most important reason for this difference is  
15  
16  
17 that the IOM recommendation was derived largely from data collected among white  
18  
19  
20 women and may not well represent Chinese Population<sup>[34]</sup>. Therefore, we plan to  
21  
22  
23 establish GWG standards that can be applied to Chinese population.  
24  
25  
26

27  
28  
29 Our data suggest effect modification by fetal sex in the association of GWG in late  
30  
31  
32 pregnancy with birth outcomes. Recent studies suggest that fetus sex may affect  
33  
34  
35 pregnancy outcomes<sup>[35-36]</sup>. Although not very clear, how fetal sex may influence these  
36  
37  
38 outcomes may be explained by several factors. The placenta is an active endocrine  
39  
40  
41 organ, a sex-specific maternal-placental-fetal interaction may be involved<sup>[24]</sup>. Animal  
42  
43  
44 studies suggest that maternal baseline BMI and GWG are associated with the hormonal  
45  
46  
47 milieu, including insulin resistance<sup>[37]</sup>. In agreement with this concept, a growing body  
48  
49  
50 of evidence link early pregnancy GWG with cord blood hormones that may affect fetal  
51  
52  
53 growth and development<sup>[38]</sup>. Previous studies reported fetal sex differences in maternal  
54  
55  
56  
57  
58  
59  
60



1  
2  
3  
4 first trimester hormones concentrations<sup>[15, 35, 39]</sup>. The resultant intrauterine environment  
5  
6  
7  
8 may affect fetal development.  
9

10  
11 Our findings may have clinical implications. First, from early pregnancy onwards,  
12  
13  
14  
15 GWG may affect subsequent maternal and neonatal outcomes. Second, although  
16  
17  
18 interventions to limit GWG in late pregnancy are effective, the benefits might be  
19  
20  
21  
22 modest at best. To mitigate the harms of excessive weight gain, addressing the  
23  
24  
25 importance of gaining the appropriate amount of weight in both early and late  
26  
27  
28  
29 pregnancy should be integrated into routine prenatal care<sup>[1, 7, 40]</sup>.  
30  
31

## 32 **Conclusion**

33  
34  
35  
36  
37 The GWG associations with adverse pregnancy outcomes differ at early and late  
38  
39  
40 pregnancy, and there may be effect modification by fetal sex in the association of GWG  
41  
42  
43  
44 in late pregnancy with some pregnancy outcomes. Weight gain management should be  
45  
46  
47  
48 integrated into the routine prenatal care to decrease the risks of adverse pregnancy  
49  
50  
51 outcomes.  
52

53  
54 **Acknowledgement** We thank the study participants for permitting us to use their  
55  
56  
57 personal data.  
58  
59  
60

1  
2  
3  
4 **Contributors** YW and SW participated in interpretation of data and involved in  
5  
6  
7  
8 drafting the manuscript. SG, ZM and LD analyzed the data and critically revised the  
9  
10  
11 manuscript. ZL, JZ and XH made substantial contributions to conception and design,  
12  
13  
14 interpreted the data, and critically revised the manuscript. All authors read and  
15  
16  
17 approved the final manuscript.  
18  
19

20  
21  
22 **Funding** This research was supported by a research grant (81873816) from the  
23  
24  
25 National Natural Science Foundation of China.  
26  
27

28  
29 **Competing interests** None declared. Completed disclosure of interests form  
30  
31  
32 available to view online as supporting information.  
33  
34

35  
36 **Patient consent for publication** Not required.  
37  
38

39  
40 **Ethics approval** This study was approved by Xinhua Hospital Research Ethics  
41  
42  
43 Committee, Shanghai Jiao Tong University School of Medicine (reference number:  
44  
45  
46 XHEC-F-NSFC-2018-122).  
47  
48

49  
50 **Provenance and peer review** Not commissioned; externally peer reviewed.  
51  
52

53  
54 **Open access** This is an open access article distributed in accordance with the  
55  
56  
57 Creative Commons Attribution Non Commercial (CC BY-NC 4.0) license, which  
58  
59  
60

1  
2  
3  
4 permits others to distribute, remix, adapt, build upon this work non-commercially, and  
5  
6  
7  
8 license their derivative works on different terms, provided the original work is properly  
9  
10  
11 cited, appropriate credit is given, any changes made indicated, and the use is non-  
12  
13  
14  
15 commercial. See: <http://creativecommons.org/licenses/by-nc/4.0/>.

16  
17  
18 **Data sharing statement** Data are available upon reasonable request. Prospective  
19  
20  
21 scientists who are interested in the SBC are welcomed to contact the authors via e-mail  
22  
23  
24  
25 to [junjimzhang@sina.com].

## 26 27 28 29 **ORCID iD**

30  
31  
32 X Hua <https://orcid.org/0000-0003-1098-5010>

## 33 34 35 36 37 38 **References**

- 39  
40  
41 1. Goldstein R.F., Abell S.K., Ranasinha S., Misso M., Boyle J.A., Black M.H., et al.  
42 Association of Gestational Weight Gain With Maternal and Infant Outcomes: A Systematic  
43 Review and Meta-analysis. *Jama* 2017; 317: 2207.  
44  
45 2. Ismail L.C., Bishop D.C., Pang R., Ohuma E.O., Kac G., Abrams B., et al. Gestational  
46 weight gain standards based on women enrolled in the Fetal Growth Longitudinal Study of the  
47 INTERGROWTH-21st Project: a prospective longitudinal cohort study. *Bmj British Medical*  
48 *Journal* 2016; 352: i555.  
49  
50 3. Shulman R., Kottke M. Impact of maternal knowledge of recommended weight gain in  
51 pregnancy on gestational weight gain. *American Journal of Obstetrics & Gynecology* 2016;  
52 214: 754.e751-754.e757.  
53  
54 4. Krukowski R.A., West D.S., Dicarlo M., Cleves M.A., Saylor M.E., Andres A.  
55  
56  
57  
58  
59  
60

1  
2  
3 Association of Gestational Weight Gain Expectations and Advice on Actual Weight Gain.  
4 ***Obstetrics & Gynecology*** 2016; 129: 76.  
5

6  
7 5. Institute of Medicine (US), National Research Council (US) Committee to Reexamine  
8 IOM Pregnancy Weight Guidelines. In: Rasmussen KM, Yaktine AL, editors. Weight Gain  
9 During Pregnancy. Washington (DC): National Academies Press. 2009.  
10

11  
12 6. Flegal K.M., Kruszon-Moran D., Carroll M.D., Fryar C.D., Ogden C.L. Trends in Obesity  
13 Among Adults in the United States, 2005 to 2014. ***JAMA*** 2016; 315: 2284-2291.  
14

15  
16 7. Caughey A.B. Gestational Weight Gain and Outcomes for Mothers and Infants. ***JAMA***  
17 2017; 317: 2175-2176.  
18

19  
20 8. Gaillard R., Steegers E.A., Franco O.H., Hofman A., Jaddoe V.W. Maternal weight gain in  
21 different periods of pregnancy and childhood cardio-metabolic outcomes. The Generation R  
22 Study. ***Int J Obes (Lond)*** 2015; 39: 677-685.  
23

24  
25 9. Retnakaran R., Wen S.W., Tan H., Zhou S., Ye C., Shen M., et al. Association of Timing  
26 of Weight Gain in Pregnancy With Infant Birth Weight. ***JAMA Pediatr*** 2018; 172: 136-142.  
27

28  
29 10. Sommer C., Morkrid K., Jenum A.K., Sletner L., Mosdol A., Birkeland K.I. Weight gain,  
30 total fat gain and regional fat gain during pregnancy and the association with gestational  
31 diabetes: a population-based cohort study. ***Int J Obes (Lond)*** 2014; 38: 76-81.  
32

33  
34 11. Baci Y., Ustuner I., Keskin H.L., Ersoy R., Avsar A.F. Effect of maternal obesity and  
35 weight gain on gestational diabetes mellitus. ***Gynecol Endocrinol*** 2013; 29: 133-136.  
36

37  
38 12. Cho E.H., Hur J., Lee K.J. Early Gestational Weight Gain Rate and Adverse Pregnancy  
39 Outcomes in Korean Women. ***Plos One*** 2015; 10: e0140376.  
40

41  
42 13. Zhang J., Tian Y., Wang W., Ouyang F., Xu J., Yu X., et al. Cohort profile: the Shanghai  
43 Birth Cohort. ***International Journal of Epidemiology*** 2019; 48: 21-21g.  
44

45  
46 14. Johansson K., Hutcheon J.A., Bodnar L.M., Cnattingius S., Stephansson O. Pregnancy  
47 weight gain by gestational age and stillbirth: a population-based cohort study. ***Bjog*** 2017; 125.  
48

49  
50 15. Collares F.M., Korevaar T.I.M., Hofman A., Steegers E.A.P., Peeters R.P., Jaddoe V.W.V.,  
51 et al. Maternal thyroid function, prepregnancy obesity and gestational weight gain-The  
52 Generation R Study: A prospective cohort study. ***Clin Endocrinol (Oxf)*** 2017; 87: 799-806.  
53

54  
55 16. Organization W.H. Obesity: preventing and managing the global epidemic. Report of a  
56 WHO consultation. 2000.  
57

58  
59 17. Berggren E.K., Groh-Wargo S., Presley L., Mouzon H.D., Catalano P.M. Maternal fat, but  
60 not lean, mass is increased among overweight/obesewomen with excess gestational weight gain.  
***American Journal of Obstetrics & Gynecology*** 2016; 214: 745.e741-745.e745.

- 1  
2  
3  
4 18. Zhu L., Zhang R., Zhang S., Shi W., Yan W., Wang X., et al. Chinese neonatal birth weight  
5 curve for different gestational age. *Chin J Pediatr* 2015; 53.  
6  
7 19. Yee L., Caughey A., Cheng Y. Association between gestational weight gain and perinatal  
8 outcomes in women with chronic hypertension. *Am J Obstet Gynecol* 2017; 09; 217 (3).  
9  
10 20. Waters T.P., Dyer A.R., Scholtens D.M., Dooley S.L., Herer E., Lowe L.P., et al. Maternal  
11 and Neonatal Morbidity for Women Who Would Be Added to the Diagnosis of GDM Using  
12 IADPSG Criteria: A Secondary Analysis of the Hyperglycemia and Adverse Pregnancy  
13 Outcome Study. *Diabetes Care* 2016; 2204-2210.  
14  
15 21. Hutcheon J.A., Bodnar L.M., Joseph K.S., Abrams B., Simhan H.N., Platt R.W. The bias  
16 in current measures of gestational weight gain. *Paediatric and Perinatal Epidemiology* 2012;  
17 26: 109-116.  
18  
19 22. Laitinen J., Jaaskelainen A., Hartikainen A.L., Sovio U., Vaarasmaki M., Pouta A., et al.  
20 Maternal weight gain during the first half of pregnancy and offspring obesity at 16 years: a  
21 prospective cohort study. *BJOG* 2012; 119: 716-723.  
22  
23 23. Margerison-Zilko C.E., Shrimali B.P., Eskenazi B., Lahiff M., Lindquist A.R., Abrams B.F.  
24 Trimester of Maternal Gestational Weight Gain and Offspring Body Weight at Birth and Age  
25 Five. *Maternal & Child Health Journal* 2012; 16: 1215-1223.  
26  
27 24. Fraser A., Tilling K., Macdonald-Wallis C., Sattar N., Brion M.-J., Benfield L., et al.  
28 Association of Maternal Weight Gain in Pregnancy With Offspring Obesity and Metabolic and  
29 Vascular Traits in Childhood. *Circulation* 2010; 121: 2557-2564.  
30  
31 25. Lawlor D.A., Paul L., Abigail F., Niklas L.N.M. Does maternal weight gain in pregnancy  
32 have long-term effects on offspring adiposity? A sibling study in a prospective cohort of  
33 146,894 men from 136,050 families. *American Journal of Clinical Nutrition* 2011; 94: 142.  
34  
35 26. Starling A.P., Brinton J.T., Glueck D.H., Shapiro A.L., Harrod C.S., Lynch A.M., et al.  
36 Associations of maternal BMI and gestational weight gain with neonatal adiposity in the  
37 Healthy Start study. *Am J Clin Nutr* 2015; 101: 302-309.  
38  
39 27. MacDonald S.C., Bodnar L.M., Himes K.P., Hutcheon J.A. Patterns of Gestational Weight  
40 Gain in Early Pregnancy and Risk of Gestational Diabetes Mellitus. *Epidemiology* 2017; 28:  
41 419-427.  
42  
43 28. Tomedi L.E., Simhan H.N., Chang C.C., McTigue K.M., Bodnar L.M. Gestational weight  
44 gain, early pregnancy maternal adiposity distribution, and maternal hyperglycemia. *Matern*  
45 *Child Health J* 2014; 18: 1265-1270.  
46  
47 29. Dai Z.Y., Liu D., Li R., Wang Y., Zhang J., Liu J., et al. Association between gestational  
48  
49  
50  
51  
52  
53  
54  
55  
56  
57  
58  
59  
60

weight gain per trimester/total gestational weight gain and gestational diabetes mellitus.

*Zhonghua Liu Xing Bing Xue Za Zhi* 2016; 37: 1336-1340.

30. Moore Simas T.A., Waring M.E., Callaghan K., Leung K., Ward Harvey M., Buabud A., et al. Weight gain in early pregnancy and risk of gestational diabetes mellitus among Latinas.

*Diabetes Metab* 2019; 45: 26-31.

31. Kominiarek M.A., Saade G., Mele L., Bailit J., Reddy U.M., Wapner R.J., et al. Association Between Gestational Weight Gain and Perinatal Outcomes. *Obstet Gynecol* 2018; 132: 875-881.

32. Yee L.M., Caughey A.B., Cheng Y.W. Association between gestational weight gain and perinatal outcomes in women with chronic hypertension. *Am J Obstet Gynecol* 2017; 217: 348 e341-348 e349.

33. American College of Obstetricians and Gynecologists; Task Force on Hypertension in Pregnancy. Hypertension in pregnancy. Report of the American College of Obstetricians and Gynecologists' Task Force on Hypertension in Pregnancy. *Obstet Gynecol* 2013; 122:1122–31.

34. Jiang X., Liu M., Song Y., Mou J., Zhou M., Ma Z., et al. The Institute of Medicine recommendation for gestational weight gain is probably not optimal among non-American pregnant women: a retrospective study from China. *The Journal of Maternal-Fetal & Neonatal Medicine* 2019, 32(8): 1353-1358.

35. Broere-Brown Z.A., Schalekamp-Timmermans S., Hofman A., Jaddoe V.W.V., Steegers E.A.P. Fetal sex dependency of maternal vascular adaptation to pregnancy: a prospective population-based cohort study. *BJOG: An International Journal of Obstetrics & Gynaecology* 2015; 123: 1087-1095.

36. Torricelli M., Voltolini C., Conti N., Bocchi C., Severi F.M., Petraglia F. Weight gain regardless of pre-pregnancy BMI and influence of fetal gender in response to labor induction in postdate pregnancy. *J Matern Fetal Neonatal Med* 2013; 26: 1016-1019.

37. Nicholas L.M., Rattanaraj L., MacLaughlin S.M., Ozanne S.E., Kleemann D.O., Walker S.K., et al. Differential effects of maternal obesity and weight loss in the periconceptional period on the epigenetic regulation of hepatic insulin-signaling pathways in the offspring. *The FASEB Journal* 2013; 27: 3786-3796.

38. Rifas-Shiman S.L., Fleisch A., Hivert M.F., Mantzoros C., Gillman M.W., Oken E. First and second trimester gestational weight gains are most strongly associated with cord blood levels of hormones at delivery important for glycemic control and somatic growth. *Metabolism*

1  
2  
3  
4 2017; 69: 112-119.

5 39. Arentson-Lantz E.J., Buhman K.K., Ajuwon K., Donkin S.S. Excess pregnancy weight  
6 gain leads to early indications of metabolic syndrome in a swine model of fetal programming.  
7

8 *Nutr Res* 2014; 34: 241-249.  
9

10 40. Teede H., Harrison C., Lombard C., Boyle J., East C., Brown W. Case for Action: proposal,  
11 obesity prevention through preventing excess weight gain during pregnancy and postpartum.  
12  
13 2015.  
14  
15  
16  
17  
18  
19  
20  
21  
22  
23  
24  
25  
26  
27  
28  
29  
30  
31  
32  
33  
34  
35  
36  
37  
38  
39  
40  
41  
42  
43  
44  
45  
46  
47  
48  
49  
50  
51  
52  
53  
54  
55  
56  
57  
58  
59  
60

For peer review only

**Table 1. Characteristics of pregnant women in the study cohort (n=2630)**

| Characteristic                                                   | Total       | Total gestational weight gain |                     |                  | P       |
|------------------------------------------------------------------|-------------|-------------------------------|---------------------|------------------|---------|
|                                                                  |             | Below<br>(n=392)              | Average<br>(n=1842) | Above<br>(n=396) |         |
| Maternal age (year), mean ± SD                                   | 29.4 ± 3.6  | 29.9 ± 3.8                    | 29.4 ± 3.5          | 28.5 ± 3.6       | <0.0001 |
| Maternal age ≥35 years, n (%)                                    | 241 (9.2)   | 51 (13)                       | 169 (9.2)           | 21 (5.3)         | 0.0002  |
| Nulliparous, n (%)                                               | 2216 (84.3) | 325 (82.9)                    | 1532 (83.2)         | 359 (90.7)       | 0.0027  |
| Education, university degree and above, n (%)                    | 2404 (91.5) | 362 (92.6)                    | 1702 (92.5)         | 340 (85.7)       | 0.0007  |
| ART, n (%)                                                       | 55 (2.1)    | 9 (2.3)                       | 37 (2)              | 9 (2.3)          | 0.9834  |
| Tobacco smoking, n (%)                                           | 72 (2.7)    | 7 (1.8)                       | 41 (2.2)            | 24 (6.1)         | <0.0001 |
| Alcohol use, n (%)                                               | 338 (12.9)  | 52 (13.3)                     | 240 (13)            | 46 (11.6)        | 0.7221  |
| Pre-pregnancy BMI (kg/m <sup>2</sup> ), mean ± SD                | 21.3 ± 3.0  | 21.7 ± 3.1                    | 21.2 ± 3.0          | 21.5 ± 2.9       | 0.0139  |
| Pre-pregnancy BMI categories, n (%)                              |             |                               |                     |                  |         |
| Underweight (< 18.5 kg/m <sup>2</sup> )                          | 396 (15.1)  | 54 (13.8)                     | 292 (15.9)          | 50 (12.6)        | 0.7530  |
| Normal weight (18.5–24.9 kg/m <sup>2</sup> )                     | 1980 (75.3) | 298 (76)                      | 1372 (74.5)         | 310 (78.3)       |         |
| Overweight and obese (≥ 25 kg/m <sup>2</sup> )                   | 254 (9.7)   | 40 (10.2)                     | 178 (9.7)           | 36 (9.1)         |         |
| Gestational age at the first prenatal visit (week), median (IQR) | 15 (3)      | 14 (3)                        | 15 (3)              | 15 (3)           | 0.1986  |
| GWG in early pregnancy by BMI categories (kg), mean ± SD         |             |                               |                     |                  |         |
| All women                                                        | 2.2 ± 2.9   | -0.2 ± 2.8                    | 2.1 ± 2.2           | 4.9 ± 3.2        | <0.0001 |
| Underweight (< 18.5 kg/m <sup>2</sup> )                          | 2.5 ± 2.4   | 0.9 ± 1.9                     | 2.4 ± 2.0           | 4.8 ± 3.0        | <0.0001 |
| Normal weight (18.5–24.9 kg/m <sup>2</sup> )                     | 2.3±2.8     | 0.0 ± 2.8                     | 2.2 ± 2.2           | 4.9 ± 3.1        | <0.0001 |
| Overweight and obese (≥ 25 kg/m <sup>2</sup> )                   | 1.4±3.6     | -2.2 ± 3.3                    | 1.5 ± 2.6           | 4.7 ± 4.4        | <0.0001 |



1  
2  
3  
4  
5  
6  
7  
8  
9  
10  
11  
12  
13  
14  
15  
16  
17  
18  
19  
20  
21  
22  
23  
24  
25  
26  
27  
28  
29  
30  
31  
32  
33  
34  
35  
36  
37  
38  
39  
40  
41  
42  
43  
44  
45  
46

GWG in late pregnancy by BMI categories (kg), mean ± SD

|                                                |            |           |            |            |         |
|------------------------------------------------|------------|-----------|------------|------------|---------|
| All women                                      | 13.0 ± 3.5 | 8.2 ± 3.0 | 12.6 ± 2.9 | 17.8 ± 3.6 | <0.0001 |
| Underweight (< 18.5 kg/m <sup>2</sup> )        | 13.0 ± 3.5 | 8.9 ± 1.9 | 12.8 ± 2.5 | 18.2 ± 3.8 | <0.0001 |
| Normal weight (18.5–24.9 kg/m <sup>2</sup> )   | 12.9 ± 4.0 | 8.4 ± 3.0 | 12.8 ± 2.8 | 17.8 ± 3.6 | <0.0001 |
| Overweight and obese (≥ 25 kg/m <sup>2</sup> ) | 11.0 ± 4.9 | 5.8 ± 3.3 | 10.8 ± 3.8 | 17.4 ± 3.8 | <0.0001 |

GWG in whole pregnancy by BMI categories (kg), mean ± SD

|                                                |            |           |            |            |         |
|------------------------------------------------|------------|-----------|------------|------------|---------|
| All women                                      | 15.0 ± 4.9 | 8.1 ± 2.6 | 14.8 ± 2.7 | 22.7 ± 2.9 | <0.0001 |
| Underweight (< 18.5 kg/m <sup>2</sup> )        | 15.4 ± 4.2 | 9.7 ± 1.6 | 15.2 ± 2.3 | 23.1 ± 3.0 | <0.0001 |
| Normal weight (18.5–24.9 kg/m <sup>2</sup> )   | 15.2 ± 4.7 | 8.4 ± 2.1 | 15.0 ± 2.5 | 22.7 ± 2.8 | <0.0001 |
| Overweight and obese (≥ 25 kg/m <sup>2</sup> ) | 12.3 ± 6.1 | 3.7 ± 2.4 | 12.3 ± 3.7 | 22.0 ± 3.6 | <0.0001 |

Gestational age at delivery (week), median (IQR)

|        |        |        |        |        |
|--------|--------|--------|--------|--------|
| 39 (2) | 39 (2) | 39 (2) | 39 (2) | 0.0793 |
|--------|--------|--------|--------|--------|

Birth weight (g), mean ± SD

|            |            |            |            |         |
|------------|------------|------------|------------|---------|
| 3376 ± 450 | 3238 ± 422 | 3370 ± 438 | 3540 ± 480 | <0.0001 |
|------------|------------|------------|------------|---------|

Male infant, n (%)

|             |            |          |            |        |
|-------------|------------|----------|------------|--------|
| 1334 (51.4) | 194 (50.4) | 945 (52) | 195 (49.5) | 0.7951 |
|-------------|------------|----------|------------|--------|

ART: assisted reproductive technology; BMI: body mass index; GWG: gestational weight gain; IQR: interquartile range; SD: standard deviation.

## Figure Legend

### Figure 1. Study flow chart.

### Figure 2. Associations of gestational weight gain with pregnancy outcomes.

(A) Associations of early gestational weight gain ( $\leq 17$  week) with pregnancy outcomes. (B) Associations of late gestational weight gain ( $> 17$  week) with pregnancy outcomes. (C) Associations of total gestational weight gain with pregnancy outcomes.

NICU: neonatal intensive care unit; LGA: large for gestational age; SGA: small for gestational age; GDM: gestational diabetes mellitus; PIH: pregnancy-induced hypertension; GWG: gestational weight gain; ARR: adjusted relative risk. \* $<0.05$

Average GWG group as the reference.

<sup>a1</sup> The analysis was adjusted for maternal age, parity, pre-pregnancy BMI and length of gestation.

<sup>b1</sup> The analysis was adjusted for parity, pre-pregnancy BMI, fetal sex, GDM and PIH.

<sup>c1</sup> The analysis was adjusted for pre-pregnancy BMI, fetal sex, alcohol/tobacco use, length of gestation, GDM and PIH.

<sup>d1</sup> The analysis was adjusted for maternal age, alcohol/tobacco use, GDM and PIH.

<sup>a2</sup> The analysis was adjusted for maternal age and pre-pregnancy BMI.;

<sup>b2</sup> The analysis was adjusted for parity, pre-pregnancy BMI, fetal sex and length of gestation.

<sup>c2</sup> The analysis was adjusted for maternal age, parity, pre-pregnancy BM, GDM and PIH.

<sup>d2</sup> The analysis was adjusted for parity, pre-pregnancy BMI, fetal sex, GDM and PIH.

<sup>e2</sup> The analysis was adjusted for parity, pre-pregnancy BMI, alcohol/tobacco use, length of gestation, GDM and PIH.

<sup>f2</sup> The analysis was adjusted for maternal age, alcohol/tobacco use and length of gestation.

<sup>a3</sup> The analysis was adjusted for maternal age, parity, pre-pregnancy BMI, alcohol/tobacco use and fetal sex.

<sup>b3</sup> The analysis was adjusted for parity, pre-pregnancy BMI and length of gestation.

<sup>c3</sup> The analysis was adjusted for parity, pre-pregnancy BMI, length of gestation, GDM and PIH.

<sup>d3</sup> The analysis was adjusted for maternal age, parity and length of gestation.

<sup>e3</sup> The analysis was adjusted for pre-pregnancy BMI, fetal sex, length of gestation, GDM and PIH.

1  
2  
3  
4 **Figure 3. Associations of late gestational weight gain (>17 week) with pregnancy**  
5  
6 **outcomes, stratified by fetal sex.**  
7

8  
9 NICU: neonatal intensive care unit; LGA: large for gestational age; SGA: small for gestational age; GDM:  
10 gestational diabetes mellitus; PIH: pregnancy-induced hypertension; GWG: gestational weight gain; ARR:  
11 adjusted relative risk.  
12

13  
14 \* $<0.05$   
15

16 Average GWG group as the reference.

17 <sup>a</sup> The analysis was adjusted for maternal age and pre-pregnancy BMI.

18  
19 <sup>b</sup> The analysis was adjusted for maternal age, parity, pre-pregnancy BMI, alcohol/tobacco use and length of  
20 gestation.  
21

22  
23 <sup>c</sup> The analysis was adjusted for maternal age, pre-pregnancy BMI, GDM and PIH.

24  
25 <sup>d</sup> The analysis was adjusted for parity, pre-pregnancy BMI, alcohol/tobacco use and length of gestation.

26  
27 <sup>e</sup> The analysis was adjusted for parity, alcohol/tobacco use, length of gestation, GDM and PIH.

28  
29 <sup>f</sup> The analysis was adjusted for parity, pre-pregnancy BMI, length of gestation, GDM and PIH.  
30  
31  
32  
33  
34  
35  
36  
37  
38  
39  
40  
41  
42  
43  
44  
45  
46  
47  
48  
49  
50  
51  
52  
53  
54  
55  
56  
57  
58  
59  
60

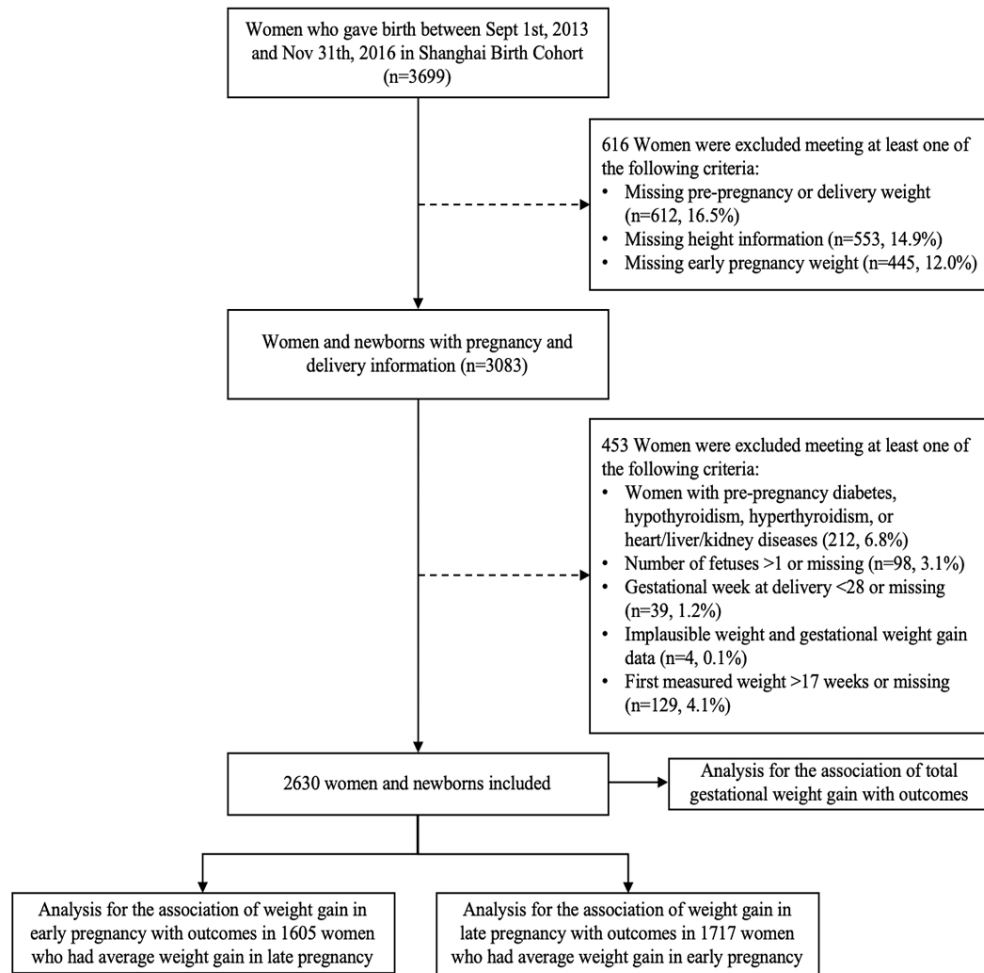

Figure 1. Study flow chart.

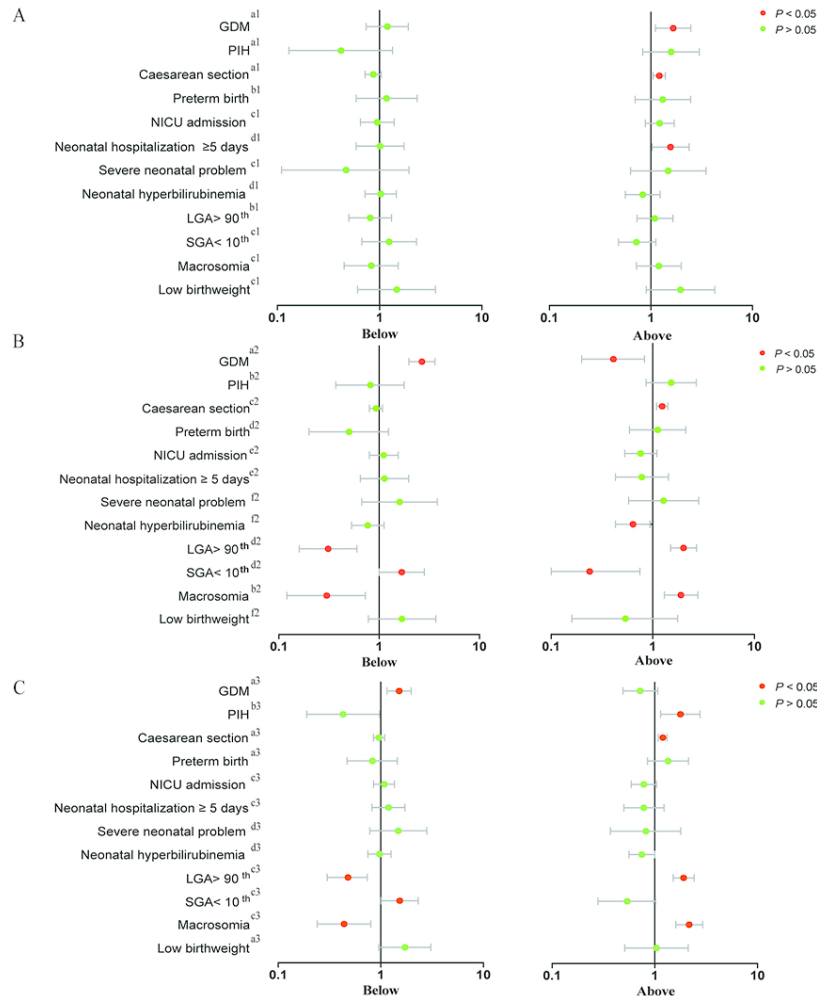

Figure 2. Associations of gestational weight gain with pregnancy outcomes. (A) Associations of early gestational weight gain ( $\leq 17$  week) with pregnancy outcomes. (B) Associations of late gestational weight gain ( $> 17$  week) with pregnancy outcomes. (C) Associations of total gestational weight gain with pregnancy outcomes. NICU: neonatal intensive care unit; LGA: large for gestational age; SGA: small for gestational age; GDM: gestational diabetes mellitus; PIH: pregnancy-induced hypertension; GWG: gestational weight gain; ARR: adjusted relative risk.  $* < 0.05$  Average GWG group as the reference. a1 The analysis was adjusted for maternal age, parity, pre-pregnancy BMI and length of gestation. b1 The analysis was adjusted for parity, pre-pregnancy BMI, fetal sex, GDM and PIH. c1 The analysis was adjusted for pre-pregnancy BMI, fetal sex, alcohol/tobacco use, length of gestation, GDM and PIH. d1 The analysis was adjusted for maternal age, alcohol/tobacco use, GDM and PIH. a2 The analysis was adjusted for maternal age and pre-pregnancy BMI.; b2 The analysis was adjusted for parity, pre-pregnancy BMI, fetal sex and length of gestation. c2 The analysis was adjusted for maternal age, parity, pre-pregnancy BM, GDM and PIH. d2 The analysis was adjusted for parity, pre-pregnancy BMI, fetal sex, GDM and PIH. e2 The analysis was adjusted for parity, pre-pregnancy BMI, alcohol/tobacco use, length of gestation, GDM and PIH. f2 The analysis was adjusted for maternal age, alcohol/tobacco use and length of gestation. a3 The analysis was adjusted for maternal age, parity, pre-pregnancy BMI, alcohol/tobacco use and fetal sex. b3 The analysis was adjusted for parity, pre-pregnancy BMI and length of gestation. c3 The analysis was adjusted for parity, pre-pregnancy BMI, length of gestation, GDM and PIH. d3 The analysis was adjusted for maternal age, parity and length of gestation. e3 The analysis was adjusted for pre-pregnancy BMI, fetal sex, length of gestation, GDM and PIH.

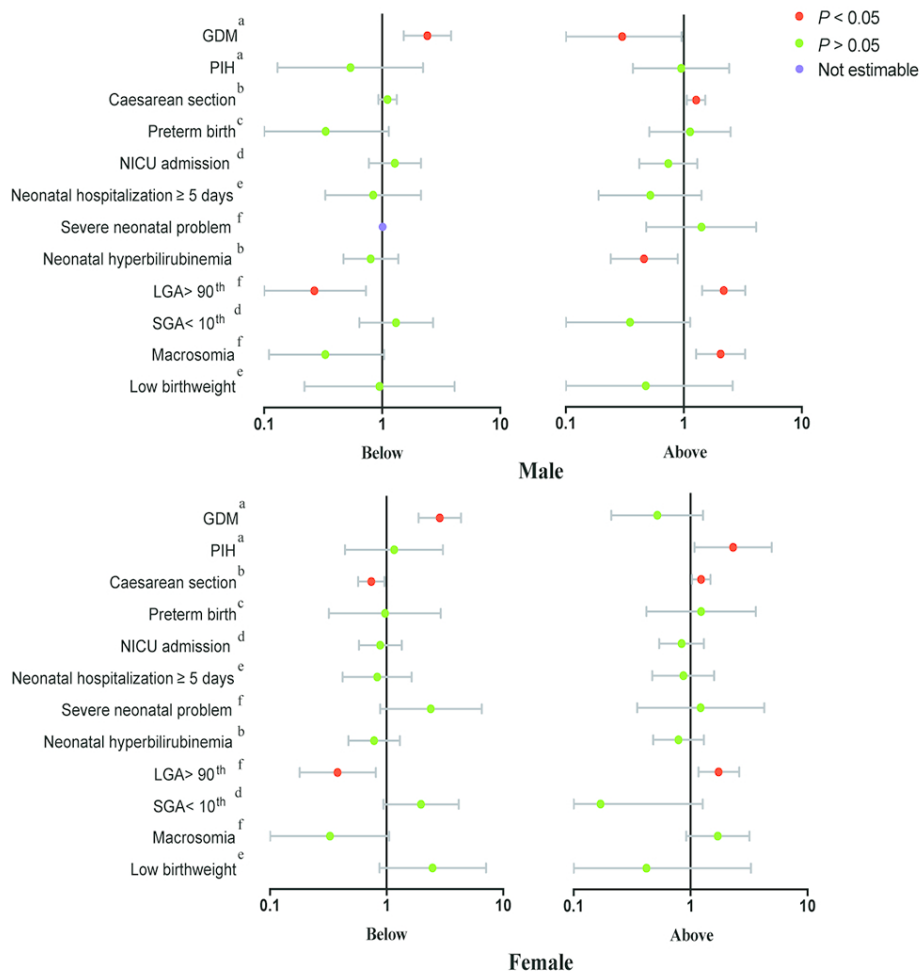

Figure 3. Associations of late gestational weight gain (>17 week) with pregnancy outcomes, stratified by fetal sex. NICU: neonatal intensive care unit; LGA: large for gestational age; SGA: small for gestational age; GDM: gestational diabetes mellitus; PIH: pregnancy-induced hypertension; GWG: gestational weight gain; ARR: adjusted relative risk. \* < 0.05 Average GWG group as the reference. a The analysis was adjusted for maternal age and pre-pregnancy BMI. b The analysis was adjusted for maternal age, parity, pre-pregnancy BMI, alcohol/tobacco use and length of gestation. c The analysis was adjusted for maternal age, pre-pregnancy BMI, GDM and PIH. d The analysis was adjusted for parity, pre-pregnancy BMI, alcohol/tobacco use and length of gestation. e The analysis was adjusted for parity, alcohol/tobacco use, length of gestation, GDM and PIH. f The analysis was adjusted for parity, pre-pregnancy BMI, length of gestation, GDM and PIH.

**Table S1. Maternal characteristics in the study of gestational weight gain in early pregnancy ( $\leq 17$  week)**

| Characteristic                                                   | Below (n=186)  | Average (n=1233) | Above (n=186)  | <i>P</i> |
|------------------------------------------------------------------|----------------|------------------|----------------|----------|
| Maternal age (year), mean $\pm$ SD                               | 28.2 $\pm$ 3.4 | 29.4 $\pm$ 3.7   | 29.4 $\pm$ 3.5 | 0.0002   |
| Maternal age $\geq 35$ years, n (%)                              | 11 (5.9)       | 126 (10.2)       | 14 (7.5)       | 0.5946   |
| Nulliparous, n (%)                                               | 165 (88.7)     | 1011 (82)        | 155 (83.3)     | 0.1683   |
| Education, university degree and above, n (%)                    | 164 (88.1)     | 1138 (92.4)      | 162 (87.6)     | 0.8411   |
| ART, n (%)                                                       | 4 (2.2)        | 27 (2.2)         | 5 (2.7)        | 0.9110   |
| Tobacco smoking, n (%)                                           | 4 (2.2)        | 26 (2.1)         | 9 (4.8)        | 0.0924   |
| Alcohol use, n (%)                                               | 15 (8.1)       | 129 (10.5)       | 18 (9.37)      | 0.5876   |
| Pre-pregnancy BMI ( $\text{kg}/\text{m}^2$ ), mean $\pm$ SD      | 21.8 $\pm$ 3.1 | 21.2 $\pm$ 3.0   | 21.7 $\pm$ 3.1 | 0.0027   |
| Pre-pregnancy BMI categories, n (%)                              |                |                  |                |          |
| Underweight ( $< 18.5 \text{ kg}/\text{m}^2$ )                   | 28 (15.1)      | 193 (15.7)       | 28 (15.1)      |          |
| Normal weight ( $18.5\text{--}24.9 \text{ kg}/\text{m}^2$ )      | 134 (72)       | 929 (75.3)       | 133 (71.5)     | 0.9848   |
| Overweight and obese ( $\geq 25 \text{ kg}/\text{m}^2$ )         | 24 (12.9)      | 111 (9)          | 25 (13.4)      |          |
| Gestational age at the first prenatal visit (week), median (IQR) | 14 (3)         | 14 (3)           | 15 (3)         | 0.8298   |
| GWG in early pregnancy by BMI categories (kg), mean $\pm$ SD     |                |                  |                |          |
| All women                                                        | -2.5 $\pm$ 2.0 | 2.1 $\pm$ 1.5    | 6.7 $\pm$ 2.1  | <0.0001  |
| Underweight ( $< 18.5 \text{ kg}/\text{m}^2$ )                   | -0.6 $\pm$ 1.1 | 2.1 $\pm$ 1.2    | 6.4 $\pm$ 2.1  | <0.0001  |
| Normal weight ( $18.5\text{--}24.9 \text{ kg}/\text{m}^2$ )      | -2.5 $\pm$ 1.7 | 2.1 $\pm$ 1.5    | 7.0 $\pm$ 2.1  | <0.0001  |
| Overweight and obese ( $\geq 25 \text{ kg}/\text{m}^2$ )         | -4.7 $\pm$ 1.7 | 1.5 $\pm$ 1.8    | 5.7 $\pm$ 1.7  | <0.0001  |
| GWG in late pregnancy by BMI categories (kg), mean $\pm$ SD      |                |                  |                |          |
| All women                                                        | 12.5 $\pm$ 2.3 | 12.6 $\pm$ 2.3   | 12.3 $\pm$ 2.4 | 0.4854   |

|    |                                                  |            |            |            |        |
|----|--------------------------------------------------|------------|------------|------------|--------|
| 1  |                                                  |            |            |            |        |
| 2  | Underweight (< 18.5 kg/m <sup>2</sup> )          | 12.4 ± 1.9 | 12.7 ± 1.9 | 12.5 ± 1.8 | 0.6323 |
| 3  |                                                  |            |            |            |        |
| 4  | Normal weight (18.5–24.9 kg/m <sup>2</sup> )     | 12.8 ± 2.2 | 12.7 ± 2.2 | 12.6 ± 2.1 | 0.8492 |
| 5  |                                                  |            |            |            |        |
| 6  | Overweight and obese (≥ 25 kg/m <sup>2</sup> )   | 10.7 ± 2.2 | 11.1 ± 3.1 | 10.4 ± 3.3 | 0.5676 |
| 7  |                                                  |            |            |            |        |
| 8  | Gestational age at delivery (week), median (IQR) | 39 (2)     | 39 (2)     | 39 (2)     | 0.9126 |
| 9  |                                                  |            |            |            |        |
| 10 | Birth weight (g), mean ± SD                      | 3296 ± 435 | 3370 ± 446 | 3382 ± 515 | 0.0428 |
| 11 |                                                  |            |            |            |        |
| 12 | Male infant, n (%)                               | 92 (50.3)  | 646 (53.2) | 102 (55.4) | 0.6091 |

13 ART: assisted reproductive technology; BMI: body mass index; GWG: gestational weight gain; IQR: interquartile range; SD: standard deviation.



**Table S2. Maternal characteristics in the study of gestational weight gain in late pregnancy (>17 week)**

| Characteristic                                                   | Below (n=236) | Average (n=1233) | Above (n=248) | <i>P</i> |
|------------------------------------------------------------------|---------------|------------------|---------------|----------|
| Maternal age (year), mean ± SD                                   | 30.4 ± 3.8    | 29.4 ± 3.7       | 27.9 ± 3.5    | <0.0001  |
| Maternal age ≥35 years, n (%)                                    | 37 (15.7)     | 126 (10.2)       | 10 (4)        | <0.0001  |
| Nulliparous, n (%)                                               | 183 (77.5)    | 1011 (82)        | 234 (94.4)    | <0.0001  |
| Education, university degree and above, n (%)                    | 222 (94.1)    | 1138 (92.4)      | 214 (86.3)    | 0.0017   |
| ART, n (%)                                                       | 7 (3)         | 27 (2.2)         | 6 (2.4)       | 0.7701   |
| Tobacco smoking, n (%)                                           | 4 (1.7)       | 26 (2.1)         | 12 (4.8)      | 0.0234   |
| Alcohol use, n (%)                                               | 20 (8.5)      | 129 (10.5)       | 20 (8.1)      | 0.3841   |
| Pre-pregnancy BMI (kg/m <sup>2</sup> ), mean ± SD                | 21.6 ± 3.1    | 21.2 ± 3.0       | 21.4 ± 3.1    | 0.0564   |
| Pre-pregnancy BMI categories, n (%)                              |               |                  |               |          |
| Underweight (< 18.5 kg/m <sup>2</sup> )                          | 29 (12.3)     | 193 (15.7)       | 37 (14.9)     |          |
| Normal weight (18.5–24.9 kg/m <sup>2</sup> )                     | 178 (75.4)    | 929 (75.3)       | 189 (76.2)    | 0.3711   |
| Overweight and obese (≥ 25 kg/m <sup>2</sup> )                   | 29 (12.3)     | 111 (9)          | 22 (8.9)      |          |
| Gestational age at the first prenatal visit (week), median (IQR) | 14 (3)        | 14 (3)           | 14 (3)        | 0.4231   |
| GWG in early pregnancy by BMI categories (kg), mean ± SD         |               |                  |               |          |
| All women                                                        | 2.1 ± 1.5     | 2.1 ± 1.5        | 2.3 ± 1.4     | 0.1943   |
| Underweight (< 18.5 kg/m <sup>2</sup> )                          | 2.7 ± 1.4     | 2.1 ± 1.2        | 2.8 ± 1.3     | 0.0009   |
| Normal weight (18.5–24.9 kg/m <sup>2</sup> )                     | 2.1 ± 1.5     | 2.1 ± 1.5        | 2.2 ± 1.5     | 0.7273   |
| Overweight and obese (≥ 25 kg/m <sup>2</sup> )                   | 1.5 ± 1.6     | 1.5 ± 1.8        | 2.1 ± 1.2     | 0.2109   |
| GWG in late pregnancy by BMI categories (kg), mean ± SD          |               |                  |               |          |
| All women                                                        | 7.0 ± 2.1     | 12.6 ± 2.3       | 19.1 ± 2.4    | <0.0001  |

|    |                                                  |            |            |            |         |
|----|--------------------------------------------------|------------|------------|------------|---------|
| 1  |                                                  |            |            |            |         |
| 2  | Underweight (< 18.5 kg/m <sup>2</sup> )          | 7.9 ± 1.2  | 12.7 ± 1.9 | 19.2 ± 2.6 | <0.0001 |
| 3  |                                                  |            |            |            |         |
| 4  | Normal weight (18.5–24.9 kg/m <sup>2</sup> )     | 7.3 ± 1.9  | 12.7 ± 2.2 | 19.1 ± 2.2 | <0.0001 |
| 5  |                                                  |            |            |            |         |
| 6  | Overweight and obese (≥ 25 kg/m <sup>2</sup> )   | 4.1 ± 1.9  | 11.1 ± 3.1 | 18.3 ± 3.2 | <0.0001 |
| 7  |                                                  |            |            |            |         |
| 8  | Gestational age at delivery (week), median (IQR) | 39 (2)     | 39 (2)     | 39 (2)     | 0.0872  |
| 9  |                                                  |            |            |            |         |
| 10 | Birth weight (g), mean ± SD                      | 3261 ± 397 | 3370 ± 446 | 3536 ± 461 | <0.0001 |
| 11 |                                                  |            |            |            |         |
| 12 | Male infant, n (%)                               | 110 (47.8) | 646 (53.2) | 120 (49)   | 0.8381  |

ART: assisted reproductive technology; BMI: body mass index; GWG: gestational weight gain; IQR: interquartile range; SD: standard deviation.

For peer review only

**Table S3. Association of pregnancy outcomes by gestational weight gain in early pregnancy ( $\leq 17$  week)**

| Outcomes                            | Below (n=186) |                   | Average (n=1233) |           | Above (n=186) |                    |
|-------------------------------------|---------------|-------------------|------------------|-----------|---------------|--------------------|
|                                     | n (%)         | aRR (95% CI)      | n (%)            | aRR       | n (%)         | aRR (95% CI)       |
| GDM                                 | 18 (9.7)      | 1.19 (0.74, 1.91) | 97 (7.9)         | Reference | 25 (13.4)     | 1.66 (1.11, 2.48)* |
| PIH                                 | 3 (1.6)       | 0.42 (0.13, 1.34) | 44 (3.6)         | Reference | 11 (5.9)      | 1.58 (0.83, 3.00)  |
| Caesarean section                   | 71 (41)       | 0.87 (0.72, 1.04) | 548 (47.3)       | Reference | 101 (56.7)    | 1.21 (1.05, 1.39)* |
| Preterm birth                       | 9 (4.8)       | 1.17 (0.59, 2.33) | 54 (4.4)         | Reference | 11 (5.9)      | 1.31 (0.70, 2.46)  |
| NICU admission                      | 24 (12.9)     | 0.95 (0.65, 1.39) | 168 (13.6)       | Reference | 31 (16.7)     | 1.22 (0.88, 1.70)  |
| Neonatal hospitalization $\geq 5$ d | 12 (6.5)      | 1.01 (0.59, 1.73) | 71 (5.8)         | Reference | 17 (9.1)      | 1.56 (1.03, 2.38)* |
| Severe neonatal problem             | 2 (1.1)       | 0.47 (0.11, 1.94) | 26 (2.1)         | Reference | 6 (3.2)       | 1.48 (0.63, 3.50)  |
| Neonatal hyperbilirubinemia         | 30 (16.1)     | 1.03 (0.72, 1.46) | 191 (15.5)       | Reference | 24 (12.9)     | 0.83 (0.56, 1.23)  |
| LGA $> 90^{\text{th}}$              | 17 (9.3)      | 0.81 (0.50, 1.31) | 132 (10.9)       | Reference | 23 (12.5)     | 1.09 (0.73, 1.65)  |
| SGA $< 10^{\text{th}}$              | 11 (6)        | 1.24 (0.67, 2.30) | 60 (5)           | Reference | 8 (4.3)       | 0.72 (0.48, 1.12)  |
| Macrosomia                          | 11 (5.9)      | 0.83 (0.45, 1.52) | 84 (6.9)         | Reference | 16 (8.6)      | 1.20 (0.72, 1.99)  |
| Low birthweight                     | 6 (3.2)       | 1.47 (0.61, 3.52) | 26 (2.1)         | Reference | 8 (4.3)       | 1.96 (0.90, 4.26)  |

aRR: adjusted relative risk; CI: confidence interval; GDM: gestational diabetes mellitus; LGA: large for gestational age; NICU: neonatal intensive care unit;

PIH: pregnancy-induced hypertension; SGA: small for gestational age.

\* $P < 0.05$

**Table S4. Association of pregnancy outcomes with gestational weight gain in late pregnancy (>17 week)**

| Outcomes                            | Below (n=236) |                     | Average (n=1233) |           | Above (n=248) |                     |
|-------------------------------------|---------------|---------------------|------------------|-----------|---------------|---------------------|
|                                     | n (%)         | aRR (95% CI)        | n (%)            | aRR       | n (%)         | aRR (95% CI)        |
| GDM                                 | 52 (22)       | 2.67 (1.98, 3.61) * | 97 (7.9)         | Reference | 8 (3.2)       | 0.41 (0.20, 0.83) * |
| PIH                                 | 7 (3)         | 0.82 (0.37, 1.78)   | 44 (3.6)         | Reference | 15 (6.1)      | 1.52 (0.86, 2.69)   |
| Caesarean section                   | 105 (46.9)    | 0.93 (0.80, 1.08)   | 548 (47.3)       | Reference | 129 (56.3)    | 1.24 (1.09, 1.41)*  |
| Preterm birth                       | 6 (2.5)       | 0.50 (0.20, 1.24)   | 54 (4.4)         | Reference | 12 (4.8)      | 1.12 (0.59, 2.12)   |
| NICU admission                      | 35 (14.8)     | 1.11 (0.80, 1.55)   | 168 (13.6)       | Reference | 27 (10.9)     | 0.76 (0.53, 1.10)   |
| Neonatal hospitalization $\geq 5$ d | 14 (5.9)      | 1.13 (0.65, 1.97)   | 71 (5.8)         | Reference | 11 (4.4)      | 0.78 (0.43, 1.43)   |
| Severe neonatal problem             | 6 (2.5)       | 1.60 (0.67, 3.80)   | 26 (2.1)         | Reference | 7 (2.8)       | 1.28 (0.58, 2.84)   |
| Neonatal hyperbilirubinemia         | 28 (11.9)     | 0.77 (0.53, 1.12)   | 191 (15.5)       | Reference | 25 (10.1)     | 0.64 (0.43, 0.94) * |
| LGA > 90 <sup>th</sup>              | 9 (3.9)       | 0.31 (0.16, 0.60)*  | 132 (10.9)       | Reference | 51 (20.8)     | 2.01 (1.50, 2.70)*  |
| SGA < 10 <sup>th</sup>              | 17 (7.4)      | 1.68 (1.00, 2.82) * | 60 (5)           | Reference | 3 (1.2)       | 0.24 (0.07, 0.75)*  |
| Macrosomia                          | 5 (2.1)       | 0.30 (0.12, 0.73)*  | 84 (6.9)         | Reference | 31 (12.6)     | 1.90 (1.30, 2.78)*  |
| Low birthweight                     | 8 (3.4)       | 1.69 (0.78, 3.68)   | 26 (2.1)         | Reference | 3 (1.2)       | 0.54 (0.16, 1.76)   |

aRR: adjusted relative risk; CI: confidence interval; GDM: gestational diabetes mellitus; LGA: large for gestational age; NICU: neonatal intensive care unit;

PIH: pregnancy-induced hypertension; SGA: small for gestational age.

\* $P < 0.05$

**Table S5. Association of pregnancy outcomes with gestational weight gain in late pregnancy (>17 week), by infant sex (27 sex unknown)**

| Outcomes                      | Male             |                    |                                   |           |                    | Female           |                    |                                   |           |                    |
|-------------------------------|------------------|--------------------|-----------------------------------|-----------|--------------------|------------------|--------------------|-----------------------------------|-----------|--------------------|
|                               | Below<br>(n=110) |                    | Average<br>(n=646)<br>(reference) |           | Above<br>(n=120)   | Below<br>(n=120) |                    | Average<br>(n=569)<br>(reference) |           | Above<br>(n=125)   |
|                               | n (%)            | aRR (95% CI)       | n (%)                             | n (%)     | aRR (95% CI)       | n (%)            | aRR (95% CI)       | n (%)                             | n (%)     | aRR (95% CI)       |
| GDM                           | 21(19.1)         | 2.41 (1.52, 3.84)* | 53 (8.2)                          | 3 (2.5)   | 0.30 (0.10, 0.96)* | 29(24.2)         | 2.86 (1.88, 4.35)* | 43 (7.6)                          | 5 (4)     | 0.52 (0.21, 1.28)  |
| PIH                           | 2 (1.8)          | 0.54 (0.13, 2.22)  | 25 (3.9)                          | 5 (4.2)   | 0.95 (0.37, 2.42)  | 5 (4.2)          | 1.16 (0.44, 3.04)  | 19 (3.3)                          | 9 (7.2)   | 2.31 (1.08, 4.95)  |
| Caesarean section             | 61 (57)          | 1.11 (0.93, 1.33)  | 291 (47.5)                        | 62 (56.4) | 1.27 (1.06, 1.52)* | 41(36.6)         | 0.74 (0.57, 0.96)* | 250 (47.3)                        | 66 (56.4) | 1.23(1.03, 1.48)*  |
| Preterm birth                 | 1 (0.9)          | 0.16 (0.02, 1.14)  | 35 (5.4)                          | 7 (5.8)   | 1.13 (0.51, 2.49)  | 4 (3.3)          | 0.97 (0.32, 2.91)  | 17 (3)                            | 4 (3.2)   | 1.23 (0.42, 3.62)  |
| NICU admission                | 16(14.6)         | 1.28 (0.77, 2.13)  | 86 (13.3)                         | 12 (10)   | 0.74 (0.42, 1.30)  | 16(13.3)         | 0.88 (0.58, 1.35)  | 75 (13.2)                         | 14 (11.2) | 0.84 (0.54, 1.30)  |
| Neonatal hospitalization ≥5 d | 5 (4.6)          | 0.84 (0.33, 2.13)  | 42 (6.5)                          | 4 (3.3)   | 0.52 (0.19, 1.41)  | 6 (5)            | 0.83 (0.42, 1.64)  | 28 (4.9)                          | 7 (5.6)   | 0.87 (0.47, 1.59)  |
| Severe neonatal problem       | 0                | NA                 | 17 (2.6)                          | 4 (3.3)   | 1.41 (0.48, 4.10)  | 5 (4.2)          | 2.39 (0.88, 6.54)  | 9 (1.6)                           | 3 (2.4)   | 1.22 (0.35, 4.27)  |
| Neonatal hyperbilirubinemia   | 13(11.8)         | 0.80 (0.47, 1.37)  | 100 (15.5)                        | 9 (7.5)   | 0.46 (0.24, 0.89)* | 15(12.5)         | 0.78 (0.47, 1.30)  | 90 (15.8)                         | 16 (12.8) | 0.79 (0.48, 1.30)  |
| LGA > 90 <sup>th</sup>        | 2 (1.8)          | 0.18 (0.04, 0.73)* | 62 (9.7)                          | 25 (20.8) | 2.18 (1.43, 3.32)* | 7 (5.8)          | 0.38 (0.18, 0.81)* | 70 (12.3)                         | 26 (20.8) | 1.74 (1.17, 2.61)* |
| SGA < 10 <sup>th</sup>        | 8 (7.3)          | 1.31 (0.64, 2.70)  | 37 (5.8)                          | 2 (1.7)   | 0.28 (0.07, 1.13)  | 9 (7.5)          | 1.97 (0.94, 4.15)  | 23 (4)                            | 1 (0.8)   | 0.17 (0.02, 1.27)  |
| Macrosomia                    | 3 (2.7)          | 0.33 (0.11, 1.04)  | 50 (7.8)                          | 19 (15.8) | 2.05 (1.27, 3.31)* | 2 (1.7)          | 0.26 (0.06, 1.05)  | 33 (5.8)                          | 12 (9.6)  | 1.71 (0.92, 3.19)  |
| Low birthweight               | 2 (1.8)          | 0.95 (0.22, 4.11)  | 14 (2.2)                          | 1 (0.8)   | 0.34 (0.05, 2.59)  | 5 (4.2)          | 2.48 (0.87, 7.11)  | 10 (1.8)                          | 1 (0.8)   | 0.42 (0.05, 3.29)  |

aRR: adjusted relative risk; CI: confidence interval; GDM: gestational diabetes mellitus; LGA: large for gestational age; NICU: neonatal intensive care unit; PIH: pregnancy-induced

hypertension; SGA: small for gestational age.

\* $P < 0.05$

**Table S6. Association of pregnancy outcomes with total gestational weight gain**

| Outcome                             | Below (n=392) |                    | Average (n=1842) |           | Above (n=396) |                    |
|-------------------------------------|---------------|--------------------|------------------|-----------|---------------|--------------------|
|                                     | n (%)         | aRR (95% CI)       | n (%)            | aRR       | n (%)         | aRR (95% CI)       |
| GDM                                 | 60 (15.3)     | 1.51 (1.15, 1.98)* | 176 (9.6)        | Reference | 27 (6.8)      | 0.72 (0.49, 1.07)  |
| PIH                                 | 6 (1.5)       | 0.43 (0.19, 0.97)* | 65 (3.5)         | Reference | 26 (6.6)      | 1.78 (1.14, 2.76)* |
| Caesarean section                   | 163 (45)      | 0.96 (0.85, 1.09)  | 778 (45.2)       | Reference | 203 (55.5)    | 1.20 (1.08, 1.32)* |
| Preterm birth                       | 15 (3.8)      | 0.83 (0.47, 1.45)  | 81 (4.4)         | Reference | 22 (5.6)      | 1.35 (0.85, 2.13)  |
| NICU admission                      | 61 (15.6)     | 1.08 (0.85, 1.36)  | 257 (14)         | Reference | 45 (11.4)     | 0.78 (0.59, 1.04)  |
| Neonatal hospitalization $\geq 5$ d | 27 (6.9)      | 1.19 (0.82, 1.72)  | 107 (5.8)        | Reference | 19 (4.8)      | 0.78 (0.50, 1.23)  |
| Severe neonatal problem             | 11 (2.8)      | 1.48 (0.78, 2.81)  | 37 (2)           | Reference | 7 (1.8)       | 0.82 (0.37, 1.79)  |
| Neonatal hyperbilirubinemia         | 58 (14.8)     | 0.97 (0.75, 1.26)  | 285 (15.5)       | Reference | 47 (11.9)     | 0.75 (0.56, 1.00)  |
| LGA > 90 <sup>th</sup>              | 20 (5.2)      | 0.48 (0.30, 0.74)* | 192 (10.6)       | Reference | 80 (20.4)     | 1.91 (1.51, 2.42)* |
| SGA < 10 <sup>th</sup>              | 27 (7)        | 1.53 (1.01, 2.32)* | 87 (4.8)         | Reference | 10 (2.5)      | 0.54 (0.28, 1.02)  |
| Macrosomia                          | 11 (2.8)      | 0.44 (0.24, 0.80)* | 115 (6.3)        | Reference | 53 (13.5)     | 2.16 (1.60, 2.93)* |
| Low birthweight                     | 15 (3.8)      | 1.72 (0.96, 3.08)  | 41 (2.2)         | Reference | 9 (2.3)       | 1.04 (0.51, 2.12)  |

aRR: adjusted relative risk; CI: confidence interval; GDM: gestational diabetes mellitus; LGA: large for gestational age; NICU: neonatal intensive care unit;

PIH: pregnancy-induced hypertension; SGA: small for gestational age.

\* $P < 0.05$

STROBE Statement—Checklist of items that should be included in reports of *cohort studies*

|                              | Item No | Recommendation                                                                                                                                                                                    | Page      |
|------------------------------|---------|---------------------------------------------------------------------------------------------------------------------------------------------------------------------------------------------------|-----------|
| <b>Title and abstract</b>    | 1       | (a) Indicate the study's design with a commonly used term in the title or the abstract                                                                                                            | 1         |
|                              |         | (b) Provide in the abstract an informative and balanced summary of what was done and what was found                                                                                               | 3-4       |
| <b>Introduction</b>          |         |                                                                                                                                                                                                   |           |
| Background/rationale         | 2       | Explain the scientific background and rationale for the investigation being reported                                                                                                              | 6         |
| Objectives                   | 3       | State specific objectives, including any prespecified hypotheses                                                                                                                                  | 7         |
| <b>Methods</b>               |         |                                                                                                                                                                                                   |           |
| Study design                 | 4       | Present key elements of study design early in the paper                                                                                                                                           | 7         |
| Setting                      | 5       | Describe the setting, locations, and relevant dates, including periods of recruitment, exposure, follow-up, and data collection                                                                   | 7         |
| Participants                 | 6       | (a) Give the eligibility criteria, and the sources and methods of selection of participants. Describe methods of follow-up                                                                        | 8         |
|                              |         | (b) For matched studies, give matching criteria and number of exposed and unexposed                                                                                                               | n/a       |
| Variables                    | 7       | Clearly define all outcomes, exposures, predictors, potential confounders, and effect modifiers. Give diagnostic criteria, if applicable                                                          | 9-11      |
| Data sources/<br>measurement | 8*      | For each variable of interest, give sources of data and details of methods of assessment (measurement). Describe comparability of assessment methods if there is more than one group              | 9         |
| Bias                         | 9       | Describe any efforts to address potential sources of bias                                                                                                                                         | 9         |
| Study size                   | 10      | Explain how the study size was arrived at                                                                                                                                                         | 8         |
| Quantitative variables       | 11      | Explain how quantitative variables were handled in the analyses. If applicable, describe which groupings were chosen and why                                                                      | 10-11     |
| Statistical methods          | 12      | (a) Describe all statistical methods, including those used to control for confounding                                                                                                             | 12-13     |
|                              |         | (b) Describe any methods used to examine subgroups and interactions                                                                                                                               | 12        |
|                              |         | (c) Explain how missing data were addressed                                                                                                                                                       | 12        |
|                              |         | (d) If applicable, explain how loss to follow-up was addressed                                                                                                                                    | 12        |
|                              |         | (e) Describe any sensitivity analyses                                                                                                                                                             | n/a       |
| <b>Results</b>               |         |                                                                                                                                                                                                   |           |
| Participants                 | 13*     | (a) Report numbers of individuals at each stage of study—eg numbers potentially eligible, examined for eligibility, confirmed eligible, included in the study, completing follow-up, and analysed | 13        |
|                              |         | (b) Give reasons for non-participation at each stage                                                                                                                                              | fig 1     |
|                              |         | (c) Consider use of a flow diagram                                                                                                                                                                | fig 1     |
| Descriptive data             | 14*     | (a) Give characteristics of study participants (eg demographic, clinical, social) and information on exposures and potential confounders                                                          | table 1   |
|                              |         | (b) Indicate number of participants with missing data for each variable of interest                                                                                                               | n/a       |
|                              |         | (c) Summarise follow-up time (eg, average and total amount)                                                                                                                                       | 13        |
| Outcome data                 | 15*     | Report numbers of outcome events or summary measures over time                                                                                                                                    | table 2-3 |
| Main results                 | 16      | (a) Give unadjusted estimates and, if applicable, confounder-adjusted                                                                                                                             | 14-15     |

|                          |    |                                                                                                                                                                            |       |
|--------------------------|----|----------------------------------------------------------------------------------------------------------------------------------------------------------------------------|-------|
|                          |    | estimates and their precision (eg, 95% confidence interval). Make clear which confounders were adjusted for and why they were included                                     |       |
|                          |    | (b) Report category boundaries when continuous variables were categorized                                                                                                  | n/a   |
|                          |    | (c) If relevant, consider translating estimates of relative risk into absolute risk for a meaningful time period                                                           | n/a   |
| Other analyses           | 17 | Report other analyses done—eg analyses of subgroups and interactions, and sensitivity analyses                                                                             | 15    |
| <b>Discussion</b>        |    |                                                                                                                                                                            |       |
| Key results              | 18 | Summarise key results with reference to study objectives                                                                                                                   | 16    |
| Limitations              | 19 | Discuss limitations of the study, taking into account sources of potential bias or imprecision. Discuss both direction and magnitude of any potential bias                 | 16-17 |
| Interpretation           | 20 | Give a cautious overall interpretation of results considering objectives, limitations, multiplicity of analyses, results from similar studies, and other relevant evidence | 17-22 |
| Generalisability         | 21 | Discuss the generalisability (external validity) of the study results                                                                                                      | 22    |
| <b>Other information</b> |    |                                                                                                                                                                            |       |
| Funding                  | 22 | Give the source of funding and the role of the funders for the present study and, if applicable, for the original study on which the present article is based              | 23    |

\*Give information separately for exposed and unexposed groups.

**Note:** An Explanation and Elaboration article discusses each checklist item and gives methodological background and published examples of transparent reporting. The STROBE checklist is best used in conjunction with this article (freely available on the Web sites of PLoS Medicine at <http://www.plosmedicine.org/>, Annals of Internal Medicine at <http://www.annals.org/>, and Epidemiology at <http://www.epidem.com/>). Information on the STROBE Initiative is available at <http://www.strobe-statement.org>.
