# Supplementary material for: Gestational weight gain and adverse pregnancy outcomes: a prospective cohort study
Source: PubMed Central journal article supplement — BMJ Open. 2020 Sep 2;10(9):e038187. doi: 10.1136/bmjopen-2020-038187 (PMC7470642; doi:10.1136/bmjopen-2020-038187), 2020-09-02
Supplement: bmjopen-2020-038187supp001.pdf [file bmjopen-2020-038187supp001.pdf]

**Table S1. Maternal characteristics in the study of gestational weight gain in early pregnancy ( $\leq 17$  week)**

| Characteristic                                                   | Below (n=186)  | Average (n=1233) | Above (n=186)  | P       |
|------------------------------------------------------------------|----------------|------------------|----------------|---------|
| Maternal age (year), mean $\pm$ SD                               | 28.2 $\pm$ 3.4 | 29.4 $\pm$ 3.7   | 29.4 $\pm$ 3.5 | 0.0002  |
| Maternal age $\geq 35$ years, n (%)                              | 11 (5.9)       | 126 (10.2)       | 14 (7.5)       | 0.5946  |
| Nulliparous, n (%)                                               | 165 (88.7)     | 1011 (82)        | 155 (83.3)     | 0.1683  |
| Education, university degree and above, n (%)                    | 164 (88.1)     | 1138 (92.4)      | 162 (87.6)     | 0.8411  |
| ART, n (%)                                                       | 4 (2.2)        | 27 (2.2)         | 5 (2.7)        | 0.9110  |
| Tobacco smoking, n (%)                                           | 4 (2.2)        | 26 (2.1)         | 9 (4.8)        | 0.0924  |
| Alcohol use, n (%)                                               | 15 (8.1)       | 129 (10.5)       | 18 (9.37)      | 0.5876  |
| Pre-pregnancy BMI (kg/m <sup>2</sup> ), mean $\pm$ SD            | 21.8 $\pm$ 3.1 | 21.2 $\pm$ 3.0   | 21.7 $\pm$ 3.1 | 0.0027  |
| Pre-pregnancy BMI categories, n (%)                              |                |                  |                |         |
| Underweight (< 18.5 kg/m <sup>2</sup> )                          | 28 (15.1)      | 193 (15.7)       | 28 (15.1)      |         |
| Normal weight (18.5–24.9 kg/m <sup>2</sup> )                     | 134 (72)       | 929 (75.3)       | 133 (71.5)     | 0.9848  |
| Overweight and obese ( $\geq 25$ kg/m <sup>2</sup> )             | 24 (12.9)      | 111 (9)          | 25 (13.4)      |         |
| Gestational age at the first prenatal visit (week), median (IQR) | 14 (3)         | 14 (3)           | 15 (3)         | 0.8298  |
| GWG in early pregnancy by BMI categories (kg), mean $\pm$ SD     |                |                  |                |         |
| All women                                                        | -2.5 $\pm$ 2.0 | 2.1 $\pm$ 1.5    | 6.7 $\pm$ 2.1  | <0.0001 |
| Underweight (< 18.5 kg/m <sup>2</sup> )                          | -0.6 $\pm$ 1.1 | 2.1 $\pm$ 1.2    | 6.4 $\pm$ 2.1  | <0.0001 |
| Normal weight (18.5–24.9 kg/m <sup>2</sup> )                     | -2.5 $\pm$ 1.7 | 2.1 $\pm$ 1.5    | 7.0 $\pm$ 2.1  | <0.0001 |
| Overweight and obese ( $\geq 25$ kg/m <sup>2</sup> )             | -4.7 $\pm$ 1.7 | 1.5 $\pm$ 1.8    | 5.7 $\pm$ 1.7  | <0.0001 |
| GWG in late pregnancy by BMI categories (kg), mean $\pm$ SD      |                |                  |                |         |
| All women                                                        | 12.5 $\pm$ 2.3 | 12.6 $\pm$ 2.3   | 12.3 $\pm$ 2.4 | 0.4854  |

|                                                  |            |            |            |        |
|--------------------------------------------------|------------|------------|------------|--------|
| Underweight (< 18.5 kg/m <sup>2</sup> )          | 12.4 ± 1.9 | 12.7 ± 1.9 | 12.5 ± 1.8 | 0.6323 |
| Normal weight (18.5–24.9 kg/m <sup>2</sup> )     | 12.8 ± 2.2 | 12.7 ± 2.2 | 12.6 ± 2.1 | 0.8492 |
| Overweight and obese (≥ 25 kg/m <sup>2</sup> )   | 10.7 ± 2.2 | 11.1 ± 3.1 | 10.4 ± 3.3 | 0.5676 |
| Gestational age at delivery (week), median (IQR) | 39 (2)     | 39 (2)     | 39 (2)     | 0.9126 |
| Birth weight (g), mean ± SD                      | 3296 ± 435 | 3370 ± 446 | 3382 ± 515 | 0.0428 |
| Male infant, n (%)                               | 92 (50.3)  | 646 (53.2) | 102 (55.4) | 0.6091 |

ART: assisted reproductive technology; BMI: body mass index; GWG: gestational weight gain; IQR: interquartile range; SD: standard deviation.

**Table S2. Maternal characteristics in the study of gestational weight gain in late pregnancy (>17 week)**

| Characteristic                                                   | Below (n=236)  | Average (n=1233) | Above (n=248)  | P       |
|------------------------------------------------------------------|----------------|------------------|----------------|---------|
| Maternal age (year), mean $\pm$ SD                               | 30.4 $\pm$ 3.8 | 29.4 $\pm$ 3.7   | 27.9 $\pm$ 3.5 | <0.0001 |
| Maternal age $\geq$ 35 years, n (%)                              | 37 (15.7)      | 126 (10.2)       | 10 (4)         | <0.0001 |
| Nulliparous, n (%)                                               | 183 (77.5)     | 1011 (82)        | 234 (94.4)     | <0.0001 |
| Education, university degree and above, n (%)                    | 222 (94.1)     | 1138 (92.4)      | 214 (86.3)     | 0.0017  |
| ART, n (%)                                                       | 7 (3)          | 27 (2.2)         | 6 (2.4)        | 0.7701  |
| Tobacco smoking, n (%)                                           | 4 (1.7)        | 26 (2.1)         | 12 (4.8)       | 0.0234  |
| Alcohol use, n (%)                                               | 20 (8.5)       | 129 (10.5)       | 20 (8.1)       | 0.3841  |
| Pre-pregnancy BMI (kg/m <sup>2</sup> ), mean $\pm$ SD            | 21.6 $\pm$ 3.1 | 21.2 $\pm$ 3.0   | 21.4 $\pm$ 3.1 | 0.0564  |
| Pre-pregnancy BMI categories, n (%)                              |                |                  |                |         |
| Underweight (< 18.5 kg/m <sup>2</sup> )                          | 29 (12.3)      | 193 (15.7)       | 37 (14.9)      |         |
| Normal weight (18.5–24.9 kg/m <sup>2</sup> )                     | 178 (75.4)     | 929 (75.3)       | 189 (76.2)     | 0.3711  |
| Overweight and obese ( $\geq$ 25 kg/m <sup>2</sup> )             | 29 (12.3)      | 111 (9)          | 22 (8.9)       |         |
| Gestational age at the first prenatal visit (week), median (IQR) | 14 (3)         | 14 (3)           | 14 (3)         | 0.4231  |
| GWG in early pregnancy by BMI categories (kg), mean $\pm$ SD     |                |                  |                |         |
| All women                                                        | 2.1 $\pm$ 1.5  | 2.1 $\pm$ 1.5    | 2.3 $\pm$ 1.4  | 0.1943  |
| Underweight (< 18.5 kg/m <sup>2</sup> )                          | 2.7 $\pm$ 1.4  | 2.1 $\pm$ 1.2    | 2.8 $\pm$ 1.3  | 0.0009  |
| Normal weight (18.5–24.9 kg/m <sup>2</sup> )                     | 2.1 $\pm$ 1.5  | 2.1 $\pm$ 1.5    | 2.2 $\pm$ 1.5  | 0.7273  |
| Overweight and obese ( $\geq$ 25 kg/m <sup>2</sup> )             | 1.5 $\pm$ 1.6  | 1.5 $\pm$ 1.8    | 2.1 $\pm$ 1.2  | 0.2109  |
| GWG in late pregnancy by BMI categories (kg), mean $\pm$ SD      |                |                  |                |         |
| All women                                                        | 7.0 $\pm$ 2.1  | 12.6 $\pm$ 2.3   | 19.1 $\pm$ 2.4 | <0.0001 |

|                                                  |            |            |            |         |
|--------------------------------------------------|------------|------------|------------|---------|
| Underweight (< 18.5 kg/m <sup>2</sup> )          | 7.9 ± 1.2  | 12.7 ± 1.9 | 19.2 ± 2.6 | <0.0001 |
| Normal weight (18.5–24.9 kg/m <sup>2</sup> )     | 7.3 ± 1.9  | 12.7 ± 2.2 | 19.1 ± 2.2 | <0.0001 |
| Overweight and obese (≥ 25 kg/m <sup>2</sup> )   | 4.1 ± 1.9  | 11.1 ± 3.1 | 18.3 ± 3.2 | <0.0001 |
| Gestational age at delivery (week), median (IQR) | 39 (2)     | 39 (2)     | 39 (2)     | 0.0872  |
| Birth weight (g), mean ± SD                      | 3261 ± 397 | 3370 ± 446 | 3536 ± 461 | <0.0001 |
| Male infant, n (%)                               | 110 (47.8) | 646 (53.2) | 120 (49)   | 0.8381  |

ART: assisted reproductive technology; BMI: body mass index; GWG: gestational weight gain; IQR: interquartile range; SD: standard deviation.

**Table S3. Association of pregnancy outcomes by gestational weight gain in early pregnancy ( $\leq 17$  week)**

| Outcomes                            | Below (n=186) |                   | Average (n=1233) |           | Above (n=186) |                    |
|-------------------------------------|---------------|-------------------|------------------|-----------|---------------|--------------------|
|                                     | n (%)         | aRR (95% CI)      | n (%)            | aRR       | n (%)         | aRR (95% CI)       |
| GDM                                 | 18 (9.7)      | 1.19 (0.74, 1.91) | 97 (7.9)         | Reference | 25 (13.4)     | 1.66 (1.11, 2.48)* |
| PIH                                 | 3 (1.6)       | 0.42 (0.13, 1.34) | 44 (3.6)         | Reference | 11 (5.9)      | 1.58 (0.83, 3.00)  |
| Caesarean section                   | 71 (41)       | 0.87 (0.72, 1.04) | 548 (47.3)       | Reference | 101 (56.7)    | 1.21 (1.05, 1.39)* |
| Preterm birth                       | 9 (4.8)       | 1.17 (0.59, 2.33) | 54 (4.4)         | Reference | 11 (5.9)      | 1.31 (0.70, 2.46)  |
| NICU admission                      | 24 (12.9)     | 0.95 (0.65, 1.39) | 168 (13.6)       | Reference | 31 (16.7)     | 1.22 (0.88, 1.70)  |
| Neonatal hospitalisation $\geq 5$ d | 12 (6.5)      | 1.01 (0.59, 1.73) | 71 (5.8)         | Reference | 17 (9.1)      | 1.56 (1.03, 2.38)* |
| Severe neonatal problem             | 2 (1.1)       | 0.47 (0.11, 1.94) | 26 (2.1)         | Reference | 6 (3.2)       | 1.48 (0.63, 3.50)  |
| Neonatal hyperbilirubinemia         | 30 (16.1)     | 1.03 (0.72, 1.46) | 191 (15.5)       | Reference | 24 (12.9)     | 0.83 (0.56, 1.23)  |
| LGA $> 90^{\text{th}}$              | 17 (9.3)      | 0.81 (0.50, 1.31) | 132 (10.9)       | Reference | 23 (12.5)     | 1.09 (0.73, 1.65)  |
| SGA $< 10^{\text{th}}$              | 11 (6)        | 1.24 (0.67, 2.30) | 60 (5)           | Reference | 8 (4.3)       | 0.72 (0.48, 1.12)  |
| Macrosomia                          | 11 (5.9)      | 0.83 (0.45, 1.52) | 84 (6.9)         | Reference | 16 (8.6)      | 1.20 (0.72, 1.99)  |
| Low birthweight                     | 6 (3.2)       | 1.47 (0.61, 3.52) | 26 (2.1)         | Reference | 8 (4.3)       | 1.96 (0.90, 4.26)  |

aRR: adjusted relative risk; CI: confidence interval; GDM: gestational diabetes mellitus; LGA: large for gestational age; NICU: neonatal intensive care unit;

PIH: pregnancy-induced hypertension; SGA: small for gestational age.

\* $P < 0.05$

**Table S4. Association of pregnancy outcomes with gestational weight gain in late pregnancy (>17 week)**

| Outcomes                      | Below (n=236) |                    | Average (n=1233) |           | Above (n=248) |                    |
|-------------------------------|---------------|--------------------|------------------|-----------|---------------|--------------------|
|                               | n (%)         | aRR (95% CI)       | n (%)            | aRR       | n (%)         | aRR (95% CI)       |
| GDM                           | 52 (22)       | 2.67 (1.98, 3.61)* | 97 (7.9)         | Reference | 8 (3.2)       | 0.41 (0.20, 0.83)* |
| PIH                           | 7 (3)         | 0.82 (0.37, 1.78)  | 44 (3.6)         | Reference | 15 (6.1)      | 1.52 (0.86, 2.69)  |
| Caesarean section             | 105 (46.9)    | 0.93 (0.80, 1.08)  | 548 (47.3)       | Reference | 129 (56.3)    | 1.24 (1.09, 1.41)* |
| Preterm birth                 | 6 (2.5)       | 0.50 (0.20, 1.24)  | 54 (4.4)         | Reference | 12 (4.8)      | 1.12 (0.59, 2.12)  |
| NICU admission                | 35 (14.8)     | 1.11 (0.80, 1.55)  | 168 (13.6)       | Reference | 27 (10.9)     | 0.76 (0.53, 1.10)  |
| Neonatal hospitalisation ≥5 d | 14 (5.9)      | 1.13 (0.65, 1.97)  | 71 (5.8)         | Reference | 11 (4.4)      | 0.78 (0.43, 1.43)  |
| Severe neonatal problem       | 6 (2.5)       | 1.60 (0.67, 3.80)  | 26 (2.1)         | Reference | 7 (2.8)       | 1.28 (0.58, 2.84)  |
| Neonatal hyperbilirubinemia   | 28 (11.9)     | 0.77 (0.53, 1.12)  | 191 (15.5)       | Reference | 25 (10.1)     | 0.64 (0.43, 0.94)* |
| LGA > 90 <sup>th</sup>        | 9 (3.9)       | 0.31 (0.16, 0.60)* | 132 (10.9)       | Reference | 51 (20.8)     | 2.01 (1.50, 2.70)* |
| SGA < 10 <sup>th</sup>        | 17 (7.4)      | 1.68 (1.00, 2.82)* | 60 (5)           | Reference | 3 (1.2)       | 0.24 (0.07, 0.75)* |
| Macrosomia                    | 5 (2.1)       | 0.30 (0.12, 0.73)* | 84 (6.9)         | Reference | 31 (12.6)     | 1.90 (1.30, 2.78)* |
| Low birthweight               | 8 (3.4)       | 1.69 (0.78, 3.68)  | 26 (2.1)         | Reference | 3 (1.2)       | 0.54 (0.16, 1.76)  |

aRR: adjusted relative risk; CI: confidence interval; GDM: gestational diabetes mellitus; LGA: large for gestational age; NICU: neonatal intensive care unit;

PIH: pregnancy-induced hypertension; SGA: small for gestational age.

\* $P < 0.05$

**Table S5. Association of pregnancy outcomes with gestational weight gain in late pregnancy (>17 week), by infant sex (27 sex unknown)**

| Outcomes                      | Male     |                    |            |           |                    | Female   |                    |            |           |                    |
|-------------------------------|----------|--------------------|------------|-----------|--------------------|----------|--------------------|------------|-----------|--------------------|
|                               | Below    |                    | Average    |           | Above              | Below    |                    | Average    |           | Above              |
|                               | (n=110)  |                    | (n=646)    | (n=646)   | (n=120)            | (n=120)  | (n=120)            | (n=569)    | (n=569)   | (n=125)            |
|                               | n (%)    | aRR (95% CI)       | n (%)      | n (%)     | aRR (95% CI)       | n (%)    | aRR (95% CI)       | n (%)      | n (%)     | aRR (95% CI)       |
| GDM                           | 21(19.1) | 2.41 (1.52, 3.84)* | 53 (8.2)   | 3 (2.5)   | 0.30 (0.10, 0.96)* | 29(24.2) | 2.86 (1.88, 4.35)* | 43 (7.6)   | 5 (4)     | 0.52 (0.21, 1.28)  |
| PIH                           | 2 (1.8)  | 0.54 (0.13, 2.22)  | 25 (3.9)   | 5 (4.2)   | 0.95 (0.37, 2.42)  | 5 (4.2)  | 1.16 (0.44, 3.04)  | 19 (3.3)   | 9 (7.2)   | 2.31 (1.08, 4.95)  |
| Caesarean section             | 61 (57)  | 1.11 (0.93, 1.33)  | 291 (47.5) | 62 (56.4) | 1.27 (1.06, 1.52)* | 41(36.6) | 0.74 (0.57, 0.96)* | 250 (47.3) | 66 (56.4) | 1.23(1.03, 1.48)*  |
| Preterm birth                 | 1 (0.9)  | 0.16 (0.02, 1.14)  | 35 (5.4)   | 7 (5.8)   | 1.13 (0.51, 2.49)  | 4 (3.3)  | 0.97 (0.32, 2.91)  | 17 (3)     | 4 (3.2)   | 1.23 (0.42, 3.62)  |
| NICU admission                | 16(14.6) | 1.28 (0.77, 2.13)  | 86 (13.3)  | 12 (10)   | 0.74 (0.42, 1.30)  | 16(13.3) | 0.88 (0.58, 1.35)  | 75 (13.2)  | 14 (11.2) | 0.84 (0.54, 1.30)  |
| Neonatal hospitalisation ≥5 d | 5 (4.6)  | 0.84 (0.33, 2.13)  | 42 (6.5)   | 4 (3.3)   | 0.52 (0.19, 1.41)  | 6 (5)    | 0.83 (0.42, 1.64)  | 28 (4.9)   | 7 (5.6)   | 0.87 (0.47, 1.59)  |
| Severe neonatal problem       | 0        | NA                 | 17 (2.6)   | 4 (3.3)   | 1.41 (0.48, 4.10)  | 5 (4.2)  | 2.39 (0.88, 6.54)  | 9 (1.6)    | 3 (2.4)   | 1.22 (0.35, 4.27)  |
| Neonatal hyperbilirubinemia   | 13(11.8) | 0.80 (0.47, 1.37)  | 100 (15.5) | 9 (7.5)   | 0.46 (0.24, 0.89)* | 15(12.5) | 0.78 (0.47, 1.30)  | 90 (15.8)  | 16 (12.8) | 0.79 (0.48, 1.30)  |
| LGA > 90 <sup>th</sup>        | 2 (1.8)  | 0.18 (0.04, 0.73)* | 62 (9.7)   | 25 (20.8) | 2.18 (1.43, 3.32)* | 7 (5.8)  | 0.38 (0.18, 0.81)* | 70 (12.3)  | 26 (20.8) | 1.74 (1.17, 2.61)* |
| SGA < 10 <sup>th</sup>        | 8 (7.3)  | 1.31 (0.64, 2.70)  | 37 (5.8)   | 2 (1.7)   | 0.28 (0.07, 1.13)  | 9 (7.5)  | 1.97 (0.94, 4.15)  | 23 (4)     | 1 (0.8)   | 0.17 (0.02, 1.27)  |
| Macrosomia                    | 3 (2.7)  | 0.33 (0.11, 1.04)  | 50 (7.8)   | 19 (15.8) | 2.05 (1.27, 3.31)* | 2 (1.7)  | 0.26 (0.06, 1.05)  | 33 (5.8)   | 12 (9.6)  | 1.71 (0.92, 3.19)  |
| Low birthweight               | 2 (1.8)  | 0.95 (0.22, 4.11)  | 14 (2.2)   | 1 (0.8)   | 0.34 (0.05, 2.59)  | 5 (4.2)  | 2.48 (0.87, 7.11)  | 10 (1.8)   | 1 (0.8)   | 0.42 (0.05, 3.29)  |

aRR: adjusted relative risk; CI: confidence interval; GDM: gestational diabetes mellitus; LGA: large for gestational age; NICU: neonatal intensive care unit; PIH: pregnancy-induced

hypertension; SGA: small for gestational age.

\* $P < 0.05$

**Table S6. Association of pregnancy outcomes with total gestational weight gain**

| Outcome                             | Below (n=392) |                     | Average (n=1842) |           | Above (n=396) |                     |
|-------------------------------------|---------------|---------------------|------------------|-----------|---------------|---------------------|
|                                     | n (%)         | aRR (95% CI)        | n (%)            | aRR       | n (%)         | aRR (95% CI)        |
| GDM                                 | 60 (15.3)     | 1.51 (1.15, 1.98) * | 176 (9.6)        | Reference | 27 (6.8)      | 0.72 (0.49, 1.07)   |
| PIH                                 | 6 (1.5)       | 0.43 (0.19, 0.97) * | 65 (3.5)         | Reference | 26 (6.6)      | 1.78 (1.14, 2.76) * |
| Caesarean section                   | 163 (45)      | 0.96 (0.85, 1.09)   | 778 (45.2)       | Reference | 203 (55.5)    | 1.20 (1.08, 1.32) * |
| Preterm birth                       | 15 (3.8)      | 0.83 (0.47, 1.45)   | 81 (4.4)         | Reference | 22 (5.6)      | 1.35 (0.85, 2.13)   |
| NICU admission                      | 61 (15.6)     | 1.08 (0.85, 1.36)   | 257 (14)         | Reference | 45 (11.4)     | 0.78 (0.59, 1.04)   |
| Neonatal hospitalisation $\geq$ 5 d | 27 (6.9)      | 1.19 (0.82, 1.72)   | 107 (5.8)        | Reference | 19 (4.8)      | 0.78 (0.50, 1.23)   |
| Severe neonatal problem             | 11 (2.8)      | 1.48 (0.78, 2.81)   | 37 (2)           | Reference | 7 (1.8)       | 0.82 (0.37, 1.79)   |
| Neonatal hyperbilirubinemia         | 58 (14.8)     | 0.97 (0.75, 1.26)   | 285 (15.5)       | Reference | 47 (11.9)     | 0.75 (0.56, 1.00)   |
| LGA > 90 <sup>th</sup>              | 20 (5.2)      | 0.48 (0.30, 0.74) * | 192 (10.6)       | Reference | 80 (20.4)     | 1.91 (1.51, 2.42) * |
| SGA < 10 <sup>th</sup>              | 27 (7)        | 1.53 (1.01, 2.32) * | 87 (4.8)         | Reference | 10 (2.5)      | 0.54 (0.28, 1.02)   |
| Macrosomia                          | 11 (2.8)      | 0.44 (0.24, 0.80) * | 115 (6.3)        | Reference | 53 (13.5)     | 2.16 (1.60, 2.93) * |
| Low birthweight                     | 15 (3.8)      | 1.72 (0.96, 3.08)   | 41 (2.2)         | Reference | 9 (2.3)       | 1.04 (0.51, 2.12)   |

aRR: adjusted relative risk; CI: confidence interval; GDM: gestational diabetes mellitus; LGA: large for gestational age; NICU: neonatal intensive care unit;

PIH: pregnancy-induced hypertension; SGA: small for gestational age.

\* $P < 0.05$
